# Supplementary material for: Mechanical properties of the cuticles of three cockroach species that differ in their wind-evoked escape behavior
Source: PeerJ. 2014 Jul 31;2:e501. doi: 10.7717/peerj.501 (PMC4121590; doi:10.7717/peerj.501)
Supplement: Supplemental Information 2 — Raw data from each of the tensile and puncture force tests for the three cockroach species used in this manuscript. The tensile tests were used to obtain tensile strength, strain energy storage, and peak strain results and puncture force tests were used to calculate puncture force. [file peerj-02-501-s002.xlsx]

## Sheet: Hissing-Tensile
Species		Date		Sample information
G. portentosa		2012-03-05		Trial #	CSA (m2)	Grip Sep (mm)	Test Speed (mm/min)	Segment #	Individual #
Tensile Testing Raw Data				1	7.008e-07	9.79	1.5	2	1
				2	6.724e-07	11.29	1.5	3	1
Disp (mm)	Force (N)	Trial #		3	3.915e-07	8.92	1.5	4	1
0	0	1		4	4.704e-07	9.84	1.5	5	1
0	0	1		5	6.045e-07	8.64	1.5	6	1
0	0	1		6	3.2e-07	8.48	1.5	2	2
0	0.02	1		7	4.785e-07	6.24	1.5	3	2
0	0.05	1		8	4.033e-07	6.26	1.5	4	2
0	0.07	1		9	4.48e-07	9	1.5	5	2
0	0.1	1		10	4.44e-07	7.38	1.5	6	2
0	0.12	1		11	5.94e-07	6.16	1.5	7	2
0	0.14	1		12	6.03e-07	7.27	1.5	2	3
0	0.17	1		13	3.36e-07	8.5	1.5	3	3
0.01	0.2	1		14	3.952e-07	5.91	1.5	5	3
0.01	0.23	1		15	6.24e-07	5.82	1.5	6	3
0.02	0.26	1		16	4.318e-07	5.88	1.5	2	4
0.03	0.29	1		17	4.59e-07	5.33	1.5	3	4
0.04	0.33	1		18	4.848e-07	7.07	1.5	4	4
0.05	0.37	1		20	5.75e-07	5.5	1.5	7	4
0.06	0.42	1
0.07	0.47	1
0.08	0.52	1
0.1	0.57	1
0.11	0.65	1
0.12	0.71	1
0.12	0.78	1
0.13	0.87	1
0.15	0.96	1
0.16	1.06	1
0.17	1.19	1
0.18	1.32	1
0.19	1.48	1
0.21	1.71	1
0.21	1.95	1
0.23	2.25	1
0.24	2.74	1
0.25	3.3	1
0.27	4.17	1
0.27	5.12	1
0.29	6.07	1
0.3	7.37	1
0.31	8.18	1
0.32	8.83	1
0.33	9.4	1
0.34	6	1
0.36	6.01	1
0.37	5.7	1
0.38	5	1
0.39	4.1	1
0.41	3.01	1
0.42	2.61	1
0.43	2.28	1
Disp (mm)	Force (N)	Trial #
0	0	2
0	0	2
0	0	2
0	0.01	2
0	0.03	2
0	0.05	2
0	0.07	2
0	0.09	2
0	0.11	2
0	0.14	2
0.01	0.17	2
0.01	0.2	2
0.01	0.24	2
0.02	0.27	2
0.03	0.31	2
0.04	0.35	2
0.06	0.4	2
0.07	0.44	2
0.08	0.49	2
0.09	0.55	2
0.11	0.6	2
0.12	0.66	2
0.13	0.74	2
0.14	0.81	2
0.14	0.89	2
0.16	1	2
0.17	1.1	2
0.18	1.23	2
0.19	1.41	2
0.21	1.6	2
0.22	1.84	2
0.23	2.22	2
0.25	2.64	2
0.26	3.22	2
0.27	4.18	2
0.28	5.23	2
0.29	6.4	2
0.31	7.97	2
0.32	9.21	2
0.33	10.37	2
0.34	11.66	2
0.35	12.6	2
0.36	13.28	2
0.38	9.36	2
0.39	9.12	2
0.4	8.47	2
0.42	6.77	2
0.43	5.41	2
0.44	4.28	2
0.45	3.46	2
0.46	2.98	2
0.46	2.82	2
Disp (mm)	Force (N)	Trial #
0	0.01	3
0	0.01	3
0	0.01	3
0	0.03	3
0	0.07	3
0	0.09	3
0	0.13	3
0	0.16	3
0	0.19	3
0	0.22	3
0	0.27	3
0.01	0.33	3
0.01	0.4	3
0.02	0.48	3
0.03	0.57	3
0.04	0.65	3
0.05	0.77	3
0.06	0.89	3
0.08	1.04	3
0.09	1.25	3
0.1	1.49	3
0.11	1.8	3
0.12	2.32	3
0.13	2.91	3
0.14	3.71	3
0.15	4.98	3
0.16	6.14	3
0.17	7.45	3
0.19	8.93	3
0.2	10.15	3
0.21	10.65	3
0.22	8.62	3
0.24	8.92	3
0.25	9.06	3
0.26	7.91	3
0.27	7.28	3
0.28	5.02	3
0.3	3.38	3
0.31	2.75	3
0.32	2.41	3
0.33	2.18	3
0.34	2.02	3
0.35	1.83	3
0.35	1.74	3
0.35	1.71	3
Disp (mm)	Force (N)	Trial #
0	0	4
0	0	4
0	0	4
0	0.02	4
0	0.04	4
0	0.05	4
0	0.08	4
0	0.1	4
0	0.13	4
0	0.15	4
0	0.18	4
0	0.21	4
0.01	0.24	4
0.02	0.27	4
0.03	0.31	4
0.04	0.34	4
0.05	0.38	4
0.06	0.42	4
0.07	0.47	4
0.09	0.51	4
0.1	0.56	4
0.11	0.63	4
0.12	0.68	4
0.12	0.75	4
0.14	0.83	4
0.15	0.91	4
0.16	1	4
0.17	1.12	4
0.18	1.24	4
0.2	1.37	4
0.21	1.57	4
0.22	1.77	4
0.23	2.02	4
0.24	2.42	4
0.25	2.83	4
0.26	3.37	4
0.27	4.21	4
0.29	5.05	4
0.3	6.01	4
0.31	7.25	4
0.32	8.3	4
0.33	8.61	4
0.34	8.33	4
0.36	7.74	4
0.37	7.01	4
0.38	4.05	4
0.39	3.4	4
0.4	2.73	4
0.42	1.98	4
0.43	1.28	4
0.43	1.06	4
Disp (mm)	Force (N)	Trial #
0	0.01	5
0	0.01	5
0	0.01	5
0	0.02	5
0	0.05	5
0	0.09	5
0	0.12	5
0	0.16	5
0	0.2	5
0	0.23	5
0.01	0.26	5
0.01	0.3	5
0.01	0.34	5
0.02	0.37	5
0.03	0.41	5
0.03	0.45	5
0.05	0.49	5
0.06	0.54	5
0.07	0.58	5
0.08	0.62	5
0.1	0.68	5
0.11	0.73	5
0.12	0.79	5
0.13	0.86	5
0.14	0.93	5
0.15	1	5
0.16	1.1	5
0.17	1.19	5
0.19	1.3	5
0.2	1.45	5
0.21	1.59	5
0.22	1.77	5
0.23	2.02	5
0.24	2.3	5
0.25	2.63	5
0.26	3.17	5
0.28	3.77	5
0.29	4.52	5
0.3	5.64	5
0.31	6.73	5
0.32	7.92	5
0.33	9.3	5
0.35	10.28	5
0.36	0.88	5
0.37	0.82	5
0.38	0.8	5
0.4	0.79	5
0.41	0.76	5
0.42	0.72	5
0.43	0.7	5
Disp (mm)	Force (N)	Trial #
0	0	6
0	0	6
0	0	6
0	0.01	6
0	0.04	6
0	0.07	6
0	0.11	6
0	0.14	6
0	0.18	6
0	0.22	6
0	0.26	6
0.01	0.33	6
0.01	0.38	6
0.02	0.44	6
0.02	0.52	6
0.03	0.61	6
0.04	0.7	6
0.06	0.83	6
0.07	0.98	6
0.08	1.16	6
0.09	1.44	6
0.1	1.77	6
0.11	2.23	6
0.12	2.83	6
0.13	3.48	6
0.14	4.16	6
0.15	4.74	6
0.16	1.83	6
0.18	1.91	6
0.19	1.97	6
0.2	1.99	6
0.21	1.87	6
0.22	1.78	6
0.24	1.72	6
0.24	1.58	6
Disp (mm)	Force (N)	Trial #
0	0	7
0	0.01	7
0	0	7
0	-0.01	7
0	0	7
0	-0.01	7
0	0	7
0	0	7
0	0	7
0.01	0.19	7
0.01	0.26	7
0.02	0.32	7
0.03	0.48	7
0.04	0.78	7
0.04	1.26	7
0.06	2.04	7
0.07	3.01	7
0.08	4.24	7
0.09	6.02	7
0.1	7.35	7
0.11	8.77	7
0.12	10.32	7
0.13	11	7
0.14	10.31	7
0.16	9.53	7
0.17	8.69	7
0.18	7.53	7
0.2	5.95	7
0.21	4.76	7
0.22	4.24	7
0.23	3.67	7
0.24	3.19	7
0.25	2.84	7
0.27	2.54	7
0.28	2.32	7
0.29	2.1	7
0.3	1.93	7
0.31	1.81	7
0.32	1.67	7
0.32	1.63	7
0.32	1.62	7
0.32	1.61	7
0.32	1.6	7
Disp (mm)	Force (N)	Trial #
0	0	8
0	0	8
0	0	8
0	0.02	8
0	0.06	8
0	0.1	8
0	0.17	8
0	0.26	8
0	0.36	8
0	0.46	8
0	0.58	8
0.01	0.77	8
0.01	0.99	8
0.02	1.28	8
0.03	1.79	8
0.04	2.34	8
0.05	3.04	8
0.06	3.96	8
0.07	4.5	8
0.08	4.56	8
0.1	2.8	8
0.11	2.15	8
0.12	1.79	8
0.13	1.53	8
0.13	1.31	8
0.15	1.14	8
0.16	0.97	8
0.17	0.85	8
0.18	0.76	8
0.2	0.67	8
0.21	0.61	8
0.22	0.56	8
Disp (mm)	Force (N)	Trial #
0	0	9
0	0	9
0	0.01	9
0	0.04	9
0	0.06	9
0	0.09	9
0	0.11	9
0	0.14	9
0	0.19	9
0	0.22	9
0.01	0.26	9
0.01	0.32	9
0.02	0.37	9
0.03	0.42	9
0.04	0.5	9
0.05	0.57	9
0.06	0.66	9
0.07	0.77	9
0.09	0.9	9
0.1	1.05	9
0.11	1.27	9
0.12	1.52	9
0.13	1.84	9
0.14	2.39	9
0.15	3.03	9
0.16	3.83	9
0.18	5.03	9
0.19	6.05	9
0.2	6.95	9
0.21	5.34	9
0.22	2.85	9
0.24	2.46	9
0.25	1.95	9
0.26	1.62	9
0.27	1.35	9
0.28	0.99	9
0.29	0.82	9
Disp (mm)	Force (N)	Trial #
0	0	10
0	0.01	10
0	0	10
0	0	10
0	0.04	10
0	0.1	10
0.01	0.18	10
0.02	0.24	10
0.03	0.31	10
0.05	0.4	10
0.06	0.48	10
0.07	0.57	10
0.08	0.7	10
0.1	0.83	10
0.11	0.98	10
0.12	1.21	10
0.13	1.45	10
0.14	1.77	10
0.16	2.28	10
0.17	2.85	10
0.18	3.64	10
0.19	4.74	10
0.2	5.83	10
0.21	3.39	10
0.23	3.45	10
0.24	3.19	10
0.25	3.02	10
0.27	2.78	10
0.28	2.3	10
0.29	1.87	10
0.29	1.62	10
0.29	1.55	10
Disp (mm)	Force (N)	Trial #
0	0	11
0	0	11
0	0	11
0	0.02	11
0	0.06	11
0	0.11	11
0	0.15	11
0	0.19	11
0	0.21	11
0	0.25	11
0.01	0.28	11
0.01	0.31	11
0.01	0.36	11
0.02	0.39	11
0.03	0.43	11
0.04	0.47	11
0.05	0.52	11
0.06	0.56	11
0.08	0.62	11
0.09	0.67	11
0.1	0.73	11
0.11	0.81	11
0.12	0.89	11
0.13	0.98	11
0.14	1.09	11
0.15	1.21	11
0.16	1.35	11
0.17	1.55	11
0.18	1.76	11
0.2	2.02	11
0.21	2.41	11
0.22	2.84	11
0.23	3.37	11
0.25	4.12	11
0.26	4.68	11
0.27	5.06	11
0.29	4.64	11
0.3	4.24	11
0.31	0.8	11
0.32	0.22	11
0.33	0.17	11
0.34	0.15	11
0.36	0.14	11
0.37	0.13	11
0.38	0.13	11
Disp (mm)	Force (N)	Trial #
0	0	12
0	0	12
0	0	12
0	0.06	12
0	0.15	12
0	0.23	12
0	0.31	12
0	0.41	12
0	0.52	12
0	0.63	12
0.01	0.8	12
0.01	0.97	12
0.02	1.18	12
0.02	1.51	12
0.03	1.87	12
0.04	2.37	12
0.05	3.2	12
0.06	4.17	12
0.07	5.4	12
0.08	7.21	12
0.09	8.84	12
0.11	10.37	12
0.12	12.23	12
0.13	13.71	12
0.13	15.05	12
0.15	15.75	12
0.17	0.07	12
0.17	0.07	12
0.19	0.07	12
0.2	0.08	12
0.21	0.08	12
0.22	0.08	12
0.22	0.07	12
Disp (mm)	Force (N)	Trial #
0	0	13
0	0	13
0	0	13
0	0	13
0	0.01	13
0	0.02	13
0	0.02	13
0	0.03	13
0	0.03	13
0	0.03	13
0	0.04	13
0.01	0.04	13
0.01	0.05	13
0.02	0.05	13
0.03	0.06	13
0.04	0.07	13
0.05	0.07	13
0.06	0.07	13
0.07	0.07	13
0.09	0.08	13
0.1	0.09	13
0.11	0.1	13
0.12	0.1	13
0.12	0.11	13
0.13	0.11	13
0.15	0.12	13
0.16	0.12	13
0.17	0.13	13
0.18	0.13	13
0.18	0.13	13
0.2	0.14	13
0.21	0.15	13
0.22	0.15	13
0.23	0.16	13
0.25	0.16	13
0.26	0.17	13
0.27	0.18	13
0.28	0.18	13
0.29	0.19	13
0.3	0.2	13
0.31	0.2	13
0.32	0.21	13
0.34	0.22	13
0.35	0.23	13
0.36	0.24	13
0.37	0.25	13
0.39	0.26	13
0.4	0.27	13
0.41	0.28	13
0.42	0.29	13
0.43	0.3	13
0.45	0.31	13
0.46	0.32	13
0.47	0.33	13
0.49	0.35	13
0.5	0.36	13
0.51	0.38	13
0.52	0.39	13
0.53	0.41	13
0.54	0.43	13
0.55	0.44	13
0.57	0.47	13
0.58	0.49	13
0.59	0.51	13
0.6	0.53	13
0.62	0.56	13
0.63	0.58	13
0.64	0.6	13
0.66	0.64	13
0.67	0.67	13
0.68	0.7	13
0.69	0.74	13
0.7	0.78	13
0.71	0.81	13
0.72	0.85	13
0.73	0.85	13
0.75	-0.06	13
0.76	-0.07	13
0.77	-0.06	13
0.79	-0.07	13
0.8	-0.07	13
0.81	-0.07	13
0.82	-0.07	13
Disp (mm)	Force (N)	Trial #
0	0	14
0	0	14
0	0	14
0	0.03	14
0	0.08	14
0	0.19	14
0	0.36	14
0	0.6	14
0	0.84	14
0	1.09	14
0.01	1.47	14
0.01	1.88	14
0.01	2.42	14
0.02	3.3	14
0.03	4.24	14
0.04	5.3	14
0.05	5.89	14
0.06	6.06	14
0.07	6.08	14
0.09	4.91	14
0.1	4.27	14
0.11	3.61	14
0.12	2.97	14
0.13	2.39	14
0.14	1.96	14
0.15	1.68	14
0.16	1.4	14
0.17	1.11	14
0.18	0.92	14
0.19	0.85	14
0.21	0.76	14
0.22	0.69	14
0.23	0.66	14
0.24	0.64	14
0.26	0.59	14
0.27	0.58	14
0.28	0.57	14
0.29	0.56	14
Disp (mm)	Force (N)	Trial #
0	0	15
0	0.01	15
0	0.01	15
0	0.05	15
0	0.08	15
0	0.13	15
0	0.24	15
0	0.35	15
0	0.48	15
0	0.6	15
0.01	0.73	15
0.01	0.91	15
0.02	1.1	15
0.02	1.31	15
0.03	1.64	15
0.04	2.01	15
0.05	2.46	15
0.07	3.19	15
0.08	3.97	15
0.09	4.82	15
0.1	2.36	15
0.11	1.38	15
0.12	1.1	15
0.13	0.84	15
0.14	0.74	15
0.15	0.67	15
0.17	0.61	15
0.18	0.55	15
0.19	0.52	15
0.2	0.49	15
Disp (mm)	Force (N)	Trial #
0	0	16
0	0	16
0	0	16
0	0.01	16
0	0.22	16
0	0.43	16
0	0.62	16
0	0.84	16
0	1.16	16
0	1.49	16
0	1.9	16
0.01	2.52	16
0.01	3.17	16
0.02	3.99	16
0.03	5.12	16
0.03	6.13	16
0.04	7.11	16
0.06	8.21	16
0.07	3.52	16
0.08	3.39	16
0.1	3.19	16
0.11	2.82	16
0.12	2.42	16
0.13	1.77	16
0.13	1.28	16
0.14	0.8	16
0.15	0.3	16
0.17	0.2	16
0.18	0.15	16
0.19	0.07	16
0.2	0.04	16
0.21	0.02	16
0.21	0.01	16
Disp (mm)	Force (N)	Trial #
0	0	17
0	0	17
0	0	17
0	0.09	17
0	0.19	17
0	0.32	17
0	0.42	17
0	0.55	17
0	0.71	17
0	0.86	17
0.01	1.05	17
0.01	1.32	17
0.02	1.61	17
0.02	1.97	17
0.03	2.54	17
0.04	3.2	17
0.05	4.02	17
0.07	5.31	17
0.08	6.38	17
0.09	7.48	17
0.1	8.47	17
0.12	5.71	17
0.13	4.53	17
0.13	3.45	17
0.14	2.46	17
0.15	1.69	17
0.17	1.18	17
0.18	0.87	17
0.19	0.68	17
0.2	0.56	17
0.21	0.49	17
0.22	0.44	17
0.24	0.4	17
0.25	0.37	17
0.26	0.36	17
0.27	0.34	17
0.28	0.32	17
0.29	0.3	17
0.31	0.28	17
Disp (mm)	Force (N)	Trial #
0	0	18
0	0	18
0	0	18
0	0.03	18
0	0.05	18
0	0.08	18
0	0.11	18
0	0.15	18
0	0.19	18
0	0.24	18
0	0.28	18
0	0.33	18
0.01	0.39	18
0.01	0.45	18
0.02	0.51	18
0.03	0.59	18
0.04	0.67	18
0.05	0.76	18
0.07	0.89	18
0.08	1.03	18
0.09	1.2	18
0.1	1.46	18
0.12	1.74	18
0.13	1.99	18
0.13	1.52	18
0.14	1.62	18
0.15	1.64	18
0.17	1.46	18
0.18	1.27	18
0.19	1.13	18
0.2	1.03	18
0.21	0.97	18
0.22	0.92	18
0.24	0.84	18
0.25	0.79	18
0.26	0.72	18
0.27	0.65	18
0.29	0.57	18
0.3	0.52	18
0.31	0.48	18
0.32	0.44	18
0.34	0.41	18
0.35	0.37	18
0.36	0.35	18
0.37	0.34	18
0.39	0.33	18
0.4	0.33	18
0.4	0.32	18
0.4	0.33	18
0.4	0.33	18
0.4	0.33	18
0.4	0.33	18
Disp (mm)	Force (N)	Trial #
0	0	20
0	0.01	20
0	0.01	20
0	0.07	20
0	0.15	20
0	0.21	20
0	0.29	20
0	0.36	20
0	0.43	20
0	0.53	20
0.01	0.63	20
0.01	0.73	20
0.02	0.87	20
0.02	1	20
0.03	1.17	20
0.04	1.4	20
0.05	1.66	20
0.07	1.97	20
0.08	2.43	20
0.09	2.9	20
0.1	3.36	20
0.11	3.73	20
0.13	3.9	20
0.13	1.69	20
0.14	1.4	20
0.15	1.07	20
0.16	0.73	20
0.18	0.36	20
0.19	0.29	20
0.19	0.25	20
Species		Date		Sample information
G. portentosa	2012-03-16			Trial #	CSA (m2)	Grip Sep (mm)	Test Speed (mm/min)	Segment #	Individual #
Tensile Testing Raw Data				1	3.312e-07	6.89	1.5	2	1
				2	5.236e-07	7.38	1.5	3	1
Disp (mm)	Force (N)	Trial #		3	4.212e-07	9.45	1.5	4	1
0	0.01	1		4	4.56e-07	7.55	1.5	5	1
0	0.01	1		5	3.96e-07	8.02	1.5	6	1
0	0.01	1		6	1.2852e-06	6.03	1.5	T3	1
0	0	1		7	9.879e-07	3.98	1.5	T2	1
0	0	1		10	2.52e-07	8.75	1.5	3	2
0	-0.01	1		11	5.301e-07	6.07	1.5	4	2
0	-0.01	1		12	7.263e-07	5.5	1.5	T3	2
0	-0.01	1		13	4.775e-07	3.16	1.5	T3	2
0	-0.01	1		14	9.933e-07	6.71	1.5	T2	2
0	-0.01	1		15	1.1664e-06	3.82	1.5	T2	2
0	-0.01	1
0	0.13	1
0.01	0.19	1
0.01	0.23	1
0.01	0.37	1
0.01	0.57	1
0.02	0.9	1
0.03	1.42	1
0.04	2.05	1
0.05	2.86	1
0.07	4.15	1
0.08	5.41	1
0.09	6.82	1
0.1	8.54	1
0.105	9.09	1
0.11	8.94	1
0.12	7.44	1
0.12	6.54	1
0.13	4.48	1
0.16	3.55	1
0.16	2.9	1
0.17	2.53	1
0.17	2.2	1
0.18	1.85	1
0.18	1.71	1
0	0.01	2
0	0.01	2
0	0.02	2
0	0.03	2
0	0.07	2
0	0.09	2
0	0.1	2
0	0.13	2
0	0.15	2
0.01	0.17	2
0.01	0.19	2
0.01	0.22	2
0.01	0.29	2
0.02	0.36	2
0.02	0.43	2
0.02	0.52	2
0.04	0.67	2
0.05	0.84	2
0.06	1.08	2
0.08	1.52	2
0.09	2.06	2
0.1	2.83	2
0.12	4.06	2
0.13	5.35	2
0.13	6.66	2
0.14	8.32	2
0.15	9.53	2
0.16	10.64	2
0.18	11.26	2
0.19	10.86	2
0.2	10.26	2
0.21	5.25	2
0.22	5.04	2
0.24	4.81	2
0.25	4.49	2
0.26	4.28	2
0.27	4.03	2
0.28	3.72	2
0.3	3.51	2
0.31	3.37	2
0.32	3.21	2
0.33	3.09	2
0.34	2.86	2
0	0	3
0	0	3
0	0	3
0	0.02	3
0	0.05	3
0.01	0.07	3
0.02	0.11	3
0.03	0.14	3
0.04	0.16	3
0.06	0.2	3
0.07	0.23	3
0.08	0.26	3
0.1	0.3	3
0.11	0.34	3
0.12	0.38	3
0.14	0.43	3
0.15	0.47	3
0.16	0.53	3
0.17	0.59	3
0.17	0.62	3
0.18	0.65	3
0.2	0.73	3
0.21	0.8	3
0.22	0.9	3
0.23	1.03	3
0.25	1.16	3
0.25	1.32	3
0.27	1.58	3
0.28	1.85	3
0.29	2.2	3
0.3	2.77	3
0.32	3.39	3
0.33	4.17	3
0.34	5.37	3
0.36	6.41	3
0.37	7.47	3
0.38	8.71	3
0.39	9.58	3
0.4	9.37	3
0.42	4.7	3
0.43	4.5	3
0.44	4.39	3
0.45	4.03	3
0.46	3.48	3
0	0	4
0	0	4
0	0.01	4
0	0.05	4
0	0.11	4
0	0.2	4
0	0.28	4
0	0.37	4
0.01	0.45	4
0.01	0.57	4
0.02	0.72	4
0.03	0.89	4
0.04	1.11	4
0.05	1.47	4
0.06	1.89	4
0.07	2.44	4
0.09	3.46	4
0.1	4.44	4
0.11	5.61	4
0.12	7.07	4
0.13	8.28	4
0.13	9.32	4
0.15	10.3	4
0.16	10.4	4
0.17	4.36	4
0.19	3.67	4
0.2	3.21	4
0.21	2.72	4
0.22	2.25	4
0.24	1.9	4
0.24	1.6	4
0.25	1.32	4
0.26	1.16	4
0.28	1.02	4
0.28	0.92	4
0	0.01	5
0	0.01	5
0	0	5
0	0.03	5
0	0.09	5
0	0.12	5
0	0.16	5
0	0.21	5
0	0.25	5
0	0.29	5
0	0.33	5
0	0.37	5
0.01	0.42	5
0.01	0.48	5
0.01	0.54	5
0.01	0.59	5
0.02	0.67	5
0.04	0.73	5
0.05	0.82	5
0.06	0.92	5
0.07	1.03	5
0.09	1.14	5
0.1	1.3	5
0.11	1.46	5
0.12	1.65	5
0.13	1.92	5
0.14	2.22	5
0.15	2.6	5
0.16	3.23	5
0.17	3.82	5
0.18	4.58	5
0.19	5.57	5
0.2	6.39	5
0.22	6.87	5
0.23	6.21	5
0.24	5.67	5
0.25	5.19	5
0.27	4.87	5
0.28	4.62	5
0.29	4.26	5
0.31	3.46	5
0.31	2.59	5
0	0.01	6
0	0.02	6
0	0.25	6
0	0.68	6
0	1.15	6
0	1.5	6
0	1.85	6
0	2.29	6
0	2.71	6
0	3.18	6
0	3.84	6
0	4.5	6
0.01	5.3	6
0.01	6.48	6
0.01	7.69	6
0.02	9.07	6
0.03	10.91	6
0.04	12.46	6
0.05	14.19	6
0.06	16.05	6
0.07	17.65	6
0.08	18.92	6
0.1	20.44	6
0.11	21.53	6
0.12	21.72	6
0.12	19.11	6
0.13	17.16	6
0.14	15.1	6
0.15	12.81	6
0.16	11.45	6
0.17	10.13	6
0.18	8.72	6
0.2	7.82	6
0.2	7.01	6
0.22	5.91	6
0.23	4.91	6
0.24	4.37	6
0.26	4	6
0.27	3.7	6
0.28	3.26	6
0.3	2.41	6
0.3	2.25	6
0.32	2.12	6
0.33	1.85	6
0	0	7
0	0	7
0	0.01	7
0	0.18	7
0	0.25	7
0	0.51	7
0	1.04	7
0	1.42	7
0	1.94	7
0	2.38	7
0	2.85	7
0	3.45	7
0.01	4	7
0.01	4.6	7
0.01	5.44	7
0.01	6.3	7
0.02	7.26	7
0.03	8.53	7
0.05	9.8	7
0.06	11.34	7
0.07	13.16	7
0.08	14.93	7
0.09	16.59	7
0.11	18.87	7
0.12	20.7	7
0.12	22.39	7
0.12	24.32	7
0.14	26.04	7
0.15	27.46	7
0.16	27.63	7
0.18	12.96	7
0.18	12.19	7
0.2	11.21	7
0.21	9.53	7
0.22	8.33	7
0.23	7.1	7
0.25	6.23	7
0.26	5.56	7
0.27	4.96	7
0.29	4.54	7
0.3	4.22	7
0.31	3.85	7
0.32	3.55	7
0.33	3.31	7
0.34	3.1	7
0.35	2.9	7
0.36	2.62	7
0.36	2.49	7
0.36	2.42	7
0.37	2.39	7
0.37	2.35	7
0	0	10
0	0	10
0	0.01	10
0	0.03	10
0	0.06	10
0.01	0.08	10
0.02	0.1	10
0.03	0.12	10
0.04	0.14	10
0.05	0.17	10
0.07	0.18	10
0.08	0.21	10
0.09	0.24	10
0.1	0.26	10
0.11	0.3	10
0.11	0.33	10
0.12	0.36	10
0.13	0.4	10
0.14	0.44	10
0.16	0.47	10
0.17	0.53	10
0.18	0.58	10
0.19	0.63	10
0.21	0.71	10
0.22	0.78	10
0.23	0.86	10
0.24	0.98	10
0.26	1.09	10
0.27	1.22	10
0.28	1.4	10
0.3	1.56	10
0.31	1.71	10
0.32	1.52	10
0.33	1.47	10
0.34	1.34	10
0.36	1.13	10
0.37	1.06	10
0.38	0.99	10
0.39	0.9	10
0.4	0.83	10
0.42	0.78	10
0.43	0.73	10
0	0	11
0	0	11
0	0.01	11
0	0.04	11
0	0.06	11
0.01	0.09	11
0.03	0.11	11
0.04	0.13	11
0.06	0.15	11
0.06	0.17	11
0.07	0.18	11
0.09	0.21	11
0.1	0.24	11
0.1	0.26	11
0.13	0.3	11
0.14	0.33	11
0.15	0.35	11
0.16	0.38	11
0.17	0.42	11
0.18	0.45	11
0.19	0.49	11
0.2	0.53	11
0.21	0.58	11
0.24	0.64	11
0.25	0.69	11
0.25	0.75	11
0.27	0.84	11
0.28	0.92	11
0.29	1	11
0.3	1.12	11
0.31	1.24	11
0.33	1.41	11
0.34	1.56	11
0.35	1.74	11
0.36	1.99	11
0.38	2.23	11
0.38	2.44	11
0.39	2.69	11
0.41	2.83	11
0.42	2.91	11
0.43	2.87	11
0.44	2.78	11
0.46	2.72	11
0.47	2.63	11
0.48	2.55	11
0.49	2.45	11
0.51	2.32	11
0.52	2.18	11
0.53	1.99	11
0.54	1.81	11
0.55	1.68	11
0.57	1.54	11
0.57	1.37	11
0	0.01	12
0	0.01	12
0	0.01	12
0	0.01	12
0	0	12
0	0.01	12
0	0.01	12
0	0.01	12
0	0.01	12
0	0.01	12
0	0.01	12
0	0.19	12
0	0.3	12
0	0.38	12
0.01	0.43	12
0.01	0.65	12
0.01	0.92	12
0.02	1.24	12
0.03	1.48	12
0.04	1.72	12
0.05	2.02	12
0.07	2.29	12
0.07	2.59	12
0.09	3.06	12
0.1	3.58	12
0.11	4.31	12
0.12	5.34	12
0.12	6.47	12
0.13	7.84	12
0.14	9.49	12
0.15	10.77	12
0.17	11.16	12
0.18	11.93	12
0.19	12.31	12
0.2	11.6	12
0.21	10.25	12
0.22	9.8	12
0.23	9.31	12
0.25	8.57	12
0.26	8.16	12
0.27	7.69	12
0.28	7.16	12
0.3	6.76	12
0.31	6.41	12
0.32	6.02	12
0.33	5.69	12
0.35	5.38	12
0.36	5.11	12
0.37	4.87	12
0.38	4.4	12
0	0	13
0	-0.01	13
0	0	13
0	0.12	13
0	0.24	13
0	0.39	13
0	0.57	13
0	0.77	13
0	1.01	13
0	1.23	13
0	1.49	13
0.01	1.89	13
0.01	2.3	13
0.01	2.9	13
0.01	3.92	13
0.02	5.05	13
0.02	6.48	13
0.03	8.55	13
0.04	10.27	13
0.05	11.9	13
0.06	13.45	13
0.08	1.63	13
0.09	1.35	13
0.1	1.15	13
0.11	1.05	13
0.12	0.95	13
0.12	0.85	13
0.13	0.81	13
0.14	0.78	13
0.15	0.75	13
0.17	0.73	13
0.17	0.7	13
0	-0.01	14
0	-0.01	14
0	-0.01	14
0	0.03	14
0	0.12	14
0	0.23	14
0	0.33	14
0	0.45	14
0	0.56	14
0	0.69	14
0	0.88	14
0	1.07	14
0	1.27	14
0.01	1.55	14
0.01	1.81	14
0.01	2.09	14
0.01	2.47	14
0.01	2.8	14
0.01	3.16	14
0.02	3.63	14
0.02	4.08	14
0.03	4.6	14
0.05	5.35	14
0.06	6.14	14
0.07	7	14
0.09	8.24	14
0.1	9.45	14
0.11	10.87	14
0.12	12.65	14
0.12	14.23	14
0.12	15.92	14
0.13	17.99	14
0.15	15.13	14
0.16	15.89	14
0.17	16.59	14
0.18	16.65	14
0.19	15.28	14
0.21	14.64	14
0.21	14.4	14
0.23	14.13	14
0.24	13.51	14
0.25	12.69	14
0.26	11.24	14
0.27	9.82	14
0.28	9.19	14
0.3	8.54	14
0.31	7.82	14
0.33	7.28	14
0.34	6.79	14
0.35	6.11	14
0.36	5.06	14
0.37	4.49	14
0.38	4.11	14
0.4	3.85	14
0.41	3.64	14
0.41	3.31	14
0.41	3.22	14
0.42	3.16	14
0	0	15
0	0	15
0	0.02	15
0	0.18	15
0	0.36	15
0	0.52	15
0	0.72	15
0	0.96	15
0	1.15	15
0	1.37	15
0	1.66	15
0.01	1.86	15
0.01	2.03	15
0.01	2.35	15
0.01	2.59	15
0.01	2.84	15
0.02	3.27	15
0.03	3.43	15
0.04	3.71	15
0.05	4.28	15
0.06	4.55	15
0.08	4.93	15
0.09	5.49	15
0.1	6	15
0.11	6.53	15
0.12	7.23	15
0.13	7.89	15
0.14	8.64	15
0.15	9.63	15
0.16	10.6	15
0.17	10.69	15
0.18	11.75	15
0.19	11.67	15
0.2	8.8	15
0.21	7.19	15
0.22	5.67	15
0.23	4.69	15
0.25	3.92	15
0.26	3.44	15
0.27	3.04	15
0.29	2.61	15
0.3	2.28	15
0.31	2.01	15
0.32	1.79	15
0.33	1.59	15
0.34	1.4	15
0.36	1.24	15
0.37	1.11	15
Species		Date		Sample information
G. portentosa	2012-03-23			Trial #	CSA (m2)	Grip Sep (mm)	Test Speed (mm/min)	Segment #	Individual #
Tensile Testing Raw Data				2	2.825e-07	6.28	1.5	3	1
				3	4.564e-07	6.85	1.5	4	1
Disp (mm)	Force (N)	Trial #		4	3.978e-07	6.76	1.5	5	1
0	0	2		5	3.588e-07	5.89	1.5	6	1
0	0	2		6	2.3e-07	3.77	1.5	T3	1
0	0.05	2		7	2.961e-07	7.45	1.5	2	2
0	0.11	2		8	5.267e-07	6.44	1.5	3	2
0	0.16	2		9	5.12e-07	5.96	1.5	4	2
0	0.22	2		11	4.816e-07	4.85	1.5	6	2
0	0.27	2		12	2.046e-07	4.85	1.5	T3	2
0	0.43	2		13	9.856e-07	4.57	1.5	T3	2
0	0.62	2		14	7.938e-07	2.31	1.5	T2	2
0	0.89	2		15	4.2e-07	4.2	1.5	T2	2
0	1.17	2
0.01	1.54	2
0.01	2.2	2
0.01	2.98	2
0.02	3.97	2
0.03	5.43	2
0.04	6.74	2
0.05	8.03	2
0.06	2.52	2
0.08	2.17	2
0.09	1.9	2
0.1	1.61	2
0.11	1.4	2
0.12	1.19	2
0.12	1.06	2
0.13	0.99	2
0.17	0.92	2
0.17	0.87	2
0.17	0.8	2
0	0	3
0	0	3
0	0.01	3
0	0.12	3
0	0.21	3
0	0.3	3
0	0.37	3
0	0.42	3
0	0.51	3
0	0.62	3
0	0.82	3
0.01	1.18	3
0.01	1.59	3
0.01	2.19	3
0.02	3.16	3
0.03	4.21	3
0.04	5.5	3
0.05	7.04	3
0.07	8.34	3
0.08	5.18	3
0.09	5.39	3
0.1	4.61	3
0.11	4.72	3
0.13	4.63	3
0.13	4.5	3
0	0	4
0	0	4
0	0.04	4
0	0.12	4
0	0.16	4
0	0.2	4
0	0.26	4
0	0.31	4
0	0.35	4
0	0.4	4
0	0.49	4
0	0.6	4
0.01	0.76	4
0.01	0.92	4
0.01	1.1	4
0.03	1.37	4
0.04	1.66	4
0.05	2.03	4
0.06	2.62	4
0.08	3.32	4
0.09	4.21	4
0.1	5.46	4
0.11	6.7	4
0.12	8.05	4
0.12	6.64	4
0.13	5.04	4
0.14	4.76	4
0.16	4.22	4
0.17	3.92	4
0.17	3.3	4
0.17	2.98	4
0.17	2.86	4
0.18	2.78	4
0	0.01	5
0	0.01	5
0	0.01	5
0	0.05	5
0	0.16	5
0	0.25	5
0.02	0.31	5
0.03	0.39	5
0.04	0.58	5
0.05	0.74	5
0.07	0.93	5
0.08	1.18	5
0.09	1.43	5
0.1	1.71	5
0.11	2.14	5
0.12	2.59	5
0.13	3.13	5
0.15	3.88	5
0.16	0.88	5
0.17	0.82	5
0.19	0.77	5
0.2	0.73	5
0.21	0.68	5
0.22	0.64	5
0.22	0.58	5
0	0.02	6
0	0.02	6
0	0.03	6
0	0.08	6
0.01	0.12	6
0.02	0.15	6
0.03	0.19	6
0.04	0.26	6
0.05	0.31	6
0.07	0.35	6
0.08	0.41	6
0.09	0.47	6
0.11	0.53	6
0.12	0.61	6
0.13	0.68	6
0.14	0.76	6
0.16	0.86	6
0.17	0.95	6
0.18	1.05	6
0.19	1.22	6
0.21	1.38	6
0.22	1.59	6
0.23	1.88	6
0.24	2.18	6
0.25	2.48	6
0.27	2.81	6
0.28	3.09	6
0.29	3.25	6
0.31	3.42	6
0.32	3.57	6
0.33	3.4	6
0.34	3.36	6
0.36	3.37	6
0.37	3.38	6
0.38	3.29	6
0.39	3.16	6
0.4	2.98	6
0.42	2.75	6
0.43	2.55	6
0.44	2.37	6
0.45	2.13	6
0.47	1.89	6
0.48	1.73	6
0.49	1.54	6
0.5	1.37	6
0.51	1.12	6
0.52	1	6
0	0	7
0	0	7
0	0	7
0	0.08	7
0	0.14	7
0	0.16	7
0	0.22	7
0	0.29	7
0	0.42	7
0	0.58	7
0	0.71	7
0.01	0.88	7
0.01	1.11	7
0.01	1.36	7
0.01	1.68	7
0.02	2.19	7
0.03	2.86	7
0.04	3.64	7
0.06	4.84	7
0.07	6.05	7
0.08	7.26	7
0.1	4.07	7
0.11	4.06	7
0.12	4.08	7
0.13	4.08	7
0.13	4.04	7
0.14	3.89	7
0.15	3.56	7
0	0.01	8
0	0.01	8
0	0.01	8
0	0.07	8
0	0.11	8
0	0.18	8
0	0.22	8
0	0.25	8
0	0.31	8
0	0.42	8
0	0.58	8
0.01	0.78	8
0.01	0.98	8
0.01	1.22	8
0.02	1.59	8
0.02	2.02	8
0.03	2.59	8
0.04	3.56	8
0.06	4.59	8
0.07	5.82	8
0.08	7.46	8
0.09	8.92	8
0.1	9.69	8
0.12	7.7	8
0.12	7.97	8
0.13	7.75	8
0.14	7.48	8
0.15	7.09	8
0.16	6.9	8
0.18	6.49	8
0.19	5.99	8
0	-0.01	9
0	-0.01	9
0	0.11	9
0	0.26	9
0	0.33	9
0.01	0.45	9
0.02	0.96	9
0.03	1.62	9
0.04	2.59	9
0.06	3.67	9
0.07	4.97	9
0.08	6.7	9
0.09	8.19	9
0.1	9.74	9
0.12	8.4	9
0.13	8.6	9
0.14	7.79	9
0.15	7.6	9
0.17	7.2	9
0.18	6.68	9
0	0	11
0	0	11
0	0	11
0	0	11
0	0	11
0	0.03	11
0	0.2	11
0	0.33	11
0	0.43	11
0	0.53	11
0	0.65	11
0	1	11
0.01	1.44	11
0.01	1.88	11
0.02	2.4	11
0.03	3.19	11
0.04	3.97	11
0.05	4.93	11
0.06	4.63	11
0.08	2.14	11
0.09	1.21	11
0.1	0.98	11
0.11	0.9	11
0.12	0.85	11
0.13	0.82	11
0.14	0.79	11
0.15	0.78	11
0.16	0.76	11
0.17	0.73	11
0.17	0.72	11
0	0	12
0	0	12
0	0.01	12
0	0.02	12
0	0.06	12
0	0.08	12
0	0.11	12
0	0.14	12
0	0.16	12
0	0.19	12
0	0.22	12
0	0.24	12
0.01	0.27	12
0.01	0.3	12
0.01	0.32	12
0.02	0.34	12
0.03	0.38	12
0.05	0.41	12
0.06	0.44	12
0.07	0.47	12
0.09	0.53	12
0.1	0.56	12
0.11	0.61	12
0.12	0.65	12
0.13	0.68	12
0.14	0.73	12
0.15	0.77	12
0.16	0.81	12
0.17	0.87	12
0.19	0.92	12
0.2	0.97	12
0.21	1.05	12
0.22	1.11	12
0.23	1.18	12
0.25	1.28	12
0.26	1.38	12
0.27	1.49	12
0.28	1.64	12
0.29	1.74	12
0.31	1.91	12
0.32	2.12	12
0.33	2.26	12
0.34	2.37	12
0.36	2.5	12
0.37	2.57	12
0.38	2.61	12
0.39	2.58	12
0.4	2.71	12
0.42	2.8	12
0.43	2.78	12
0.44	2.78	12
0.45	2.71	12
0.46	2.64	12
0.48	2.56	12
0.49	2.47	12
0.5	2.34	12
0.51	2.17	12
0.52	2.05	12
0.54	1.94	12
0.55	1.88	12
0.56	1.79	12
0.57	1.63	12
0	0	13
0	0	13
0	0.01	13
0	0.29	13
0	1.59	13
0	3.24	13
0	4.67	13
0	6.35	13
0	8.69	13
0	11.28	13
0	14.09	13
0	17.71	13
0	20.81	13
0.01	24.06	13
0.01	27.64	13
0.02	30.61	13
0.02	33.28	13
0.04	35.99	13
0.05	37.6	13
0.06	38.64	13
0.08	38.41	13
0.09	35.77	13
0.1	20.03	13
0.11	17.48	13
0.12	15.98	13
0.13	14.48	13
0.14	12.7	13
0.16	11.25	13
0.17	9.96	13
0.18	8.16	13
0.2	6.24	13
0.21	4.36	13
0.22	3.07	13
0	0.01	14
0	0.01	14
0	0	14
0	0.03	14
0	0.29	14
0	0.42	14
0	0.55	14
0	2.55	14
0	3.94	14
0	5.44	14
0	7.34	14
0.01	8.63	14
0.01	10.16	14
0.02	12.3	14
0.02	13.05	14
0.03	15.02	14
0.04	17.13	14
0.05	18.94	14
0.07	20.55	14
0.08	20.16	14
0.09	21.58	14
0.1	21.43	14
0.12	19.08	14
0.13	16.98	14
0.14	16.02	14
0.15	14.19	14
0.16	12.72	14
0.17	11.2	14
0.18	9.57	14
0.19	8.25	14
0.21	7.36	14
0.22	6.43	14
0.23	5.78	14
0.24	5.27	14
0.26	4.72	14
0.27	4.34	14
0.28	3.82	14
0	0	15
0	0	15
0	0	15
0	0.02	15
0	0.19	15
0	0.31	15
0	0.4	15
0	0.51	15
0	0.65	15
0	0.86	15
0.01	1.1	15
0.01	1.3	15
0.01	1.52	15
0.01	1.83	15
0.02	2.09	15
0.03	2.39	15
0.04	2.81	15
0.05	3.23	15
0.06	3.74	15
0.08	4.46	15
0.09	5.16	15
0.1	5.93	15
0.12	6.78	15
0.13	7.27	15
0.14	6.43	15
0.15	6.47	15
0.16	6.38	15
0.18	6.36	15
0.19	6.17	15
0.2	5.79	15
0.21	5.04	15
0.22	4.24	15
0.23	3.71	15
0.25	3.27	15
0.26	2.91	15
0.27	2.73	15
0.28	2.58	15
0.3	2.44	15
0.31	2.34	15
0.32	2.24	15
0.34	2.12	15
0.35	2.03	15
0.36	1.91	15
0.38	1.66	15
0.39	1.5	15
0.4	1.37	15
0.4	1.32	15
Species		Date		Sample information
G. portentosa	2012-03-30			Trial #	CSA (m2)	Grip Sep (mm)	Test Speed (mm/min)	Segment #	Individual #
Tensile Testing Raw Data				1	3.3e-07	7	1.5	2	1
				2	3.816e-07	6.68	1.5	3	1
Disp (mm)	Force (N)	Trial #		3	2.266e-07	6.93	1.5	4	1
0	-0.01	1		4	4.128e-07	6.11	1.5	5	1
0	-0.01	1		6	3.51e-07	5.34	1.5	T3	1
0	-0.01	1		8	1.134e-06	4.02	1.5	T2	1
0	0.02	1
0	0.1	1
0	0.19	1
0	0.29	1
0	0.38	1
0	0.51	1
0	0.63	1
0	0.78	1
0	1	1
0.01	1.22	1
0.01	1.52	1
0.01	2	1
0.02	2.54	1
0.03	3.24	1
0.04	4.26	1
0.06	5.19	1
0.06	4.57	1
0.08	4.41	1
0.09	3.96	1
0.1	3.2	1
0.11	2.58	1
0.12	2.14	1
0.12	1.94	1
0.16	1.81	1
0.16	1.67	1
0.17	1.56	1
0.18	1.43	1
0.18	1.32	1
0.2	1.27	1
0.21	1.2	1
0.23	1.16	1
0.23	1.05	1
0.24	0.91	1
0	0	2
0	0	2
0	0	2
0	0.05	2
0	0.08	2
0	0.11	2
0	0.16	2
0	0.23	2
0	0.29	2
0	0.35	2
0	0.41	2
0	0.47	2
0.01	0.55	2
0.01	0.63	2
0.02	0.72	2
0.03	0.85	2
0.04	0.99	2
0.05	1.15	2
0.07	1.42	2
0.08	1.72	2
0.09	2.14	2
0.11	2.87	2
0.12	3.71	2
0.12	4.79	2
0.13	6.28	2
0.15	7.62	2
0.15	8.95	2
0.16	2.08	2
0.17	1.45	2
0.19	1.24	2
0.2	1.03	2
0.21	0.8	2
0.22	0.64	2
0.23	0.54	2
0.24	0.45	2
0	0	3
0	0	3
0	0.02	3
0	0.09	3
0	0.15	3
0	0.2	3
0	0.27	3
0	0.33	3
0.01	0.39	3
0.01	0.47	3
0.01	0.54	3
0.02	0.62	3
0.03	0.72	3
0.04	0.82	3
0.05	0.94	3
0.07	1.1	3
0.08	1.26	3
0.09	1.46	3
0.1	1.77	3
0.12	2.09	3
0.13	2.51	3
0.13	3.16	3
0.14	3.87	3
0.15	4.71	3
0.17	3.52	3
0.18	3.13	3
0.19	2.34	3
0.2	1.69	3
0.21	1.42	3
0.22	1.23	3
0.24	1.06	3
0.25	0.85	3
0.26	0.73	3
0.27	0.64	3
0.28	0.56	3
0	0	4
0	0	4
0	0.01	4
0	0.04	4
0	0.08	4
0	0.18	4
0	0.24	4
0	0.32	4
0	0.37	4
0	0.42	4
0.01	0.5	4
0.01	0.66	4
0.01	0.83	4
0.02	1.05	4
0.02	1.26	4
0.03	1.52	4
0.04	1.9	4
0.06	2.31	4
0.07	2.82	4
0.08	3.62	4
0.09	4.6	4
0.1	5.65	4
0.12	7.09	4
[truncated: 1,807 more rows]

## Sheet: Giant-Tensile
Species		Date		Sample information
B. craniifer		2012-10-05		Trial #	CSA (m2)	Grip Sep (mm)	Test Speed (mm/min)	Segment #	Individual #
Tensile Testing Raw Data				3	1.235e-07	3.28	1.5	2	1
				4	1.302e-07	2.89	1.5	3	1
Disp (mm)	Force (N)	Trial		5	1.472e-07	2.93	1.5	4	1
0	0	3		6	1.056e-07	2.19	1.5	5	1
0	0	3		7	1.199e-07	2.6	1.5	6	1
0	0	3		8	1.078e-07	2.85	1.5	4	1
0	0	3		9	1.35e-07	2.4	1.5	5	1
0	0	3		10	2.55e-07	3.14	1.5	T2	1
0.01	0.02	3		11	5.04e-07	2.84	1.5	T3	1
0.02	0.03	3
0.03	0.05	3
0.04	0.06	3
0.05	0.09	3
0.06	0.13	3
0.07	0.18	3
0.09	0.22	3
0.1	0.24	3
0.11	0.25	3
0.12	0.27	3
0.14	0.28	3
0.15	0.29	3
0.16	0.29	3
0.17	0.28	3
0.19	0.28	3
0.2	0.28	3
0.21	0.28	3
0.22	0.28	3
0.24	0.29	3
0.25	0.3	3
0.26	0.3	3
0.27	0.31	3
0.29	0.3	3
0.3	0.29	3
0.31	0.28	3
0.32	0.28	3
0.33	0.27	3
0.35	0.28	3
0.36	0.28	3
0.37	0.25	3
0.38	0.16	3
0.4	0.1	3
0.41	0.06	3
0.42	0.06	3
0.43	0.05	3
0.45	0.05	3
0.46	0.05	3
0.48	0.05	3
0.49	0.05	3
0.5	0.03	3
0.51	0.03	3
0.52	0.03	3
0	0	4
0	0	4
0	0	4
0	0	4
0	0.02	4
0.01	0.05	4
0.03	0.09	4
0.04	0.13	4
0.05	0.15	4
0.07	0.16	4
0.08	0.17	4
0.09	0.17	4
0.1	0.18	4
0.12	0.19	4
0.13	0.21	4
0.14	0.22	4
0.15	0.22	4
0.16	0.23	4
0.18	0.24	4
0.19	0.25	4
0.2	0.24	4
0.21	0.25	4
0.23	0.25	4
0.24	0.26	4
0.25	0.27	4
0.26	0.27	4
0.28	0.28	4
0.29	0.28	4
0.3	0.29	4
0.31	0.27	4
0.33	0.25	4
0.34	0.24	4
0.35	0.23	4
0.37	0.24	4
0.38	0.23	4
0.39	0.23	4
0.4	0.23	4
0.41	0.21	4
0.42	0.21	4
0.44	0.18	4
0.45	0.11	4
0.46	0.08	4
0.48	0.06	4
0.49	0.06	4
0.5	0.06	4
0.51	0.06	4
0	0	5
0	0	5
0	0.01	5
0	0.07	5
0.01	0.13	5
0.03	0.2	5
0.04	0.25	5
0.04	0.29	5
0.06	0.33	5
0.07	0.3	5
0.08	0.22	5
0.09	0.19	5
0.1	0.18	5
0.11	0.16	5
0.13	0.15	5
0.14	0.16	5
0.16	0.15	5
0.17	0.15	5
0.18	0.16	5
0.2	0.16	5
0.21	0.15	5
0.22	0.14	5
0.23	0.13	5
0.24	0.13	5
0.25	0.14	5
0.27	0.15	5
0.28	0.15	5
0.29	0.17	5
0.3	0.19	5
0.31	0.2	5
0.33	0.18	5
0.34	0.19	5
0.35	0.19	5
0.37	0.18	5
0.38	0.11	5
0.39	0.07	5
0.4	0.06	5
0.42	0.04	5
0.43	0.05	5
0.44	0.05	5
0.45	0.05	5
0.47	0.04	5
0.48	0.05	5
0.49	0.05	5
0.5	0.05	5
0.52	0.05	5
0.53	0.05	5
0	0	6
0	0	6
0	0	6
0	0.06	6
0.01	0.21	6
0.02	0.5	6
0.04	1.01	6
0.05	1.42	6
0.05	1.74	6
0.06	0.89	6
0.07	1.08	6
0.09	0.61	6
0.1	0.6	6
0.11	0.57	6
0.12	0.43	6
0.13	0.14	6
0.15	0.14	6
0.16	0.15	6
0.17	0.16	6
0.18	0.14	6
0.2	0.13	6
0.21	0.1	6
0.22	0.09	6
0.23	0.08	6
0.23	0.06	6
0.23	0.06	6
0	0	7
0	0	7
0	0	7
0	0.11	7
0.01	0.2	7
0.03	0.34	7
0.04	0.68	7
0.05	1.46	7
0.07	2.23	7
0.08	2.63	7
0.08	2.58	7
0.09	0.12	7
0.1	0.13	7
0.11	0.12	7
0.12	0.13	7
0.14	0.13	7
0.15	0.13	7
0.16	0.13	7
0.18	0.13	7
0.19	0.13	7
0.2	0.12	7
0.21	0.13	7
0.23	0.13	7
0.24	0.13	7
0.25	0.13	7
0.26	0.13	7
0.28	0.13	7
0.29	0.13	7
0.3	0.13	7
0.31	0.12	7
0.31	0.13	7
0.31	0.13	7
0.31	0.13	7
0.31	0.13	7
0.31	0.13	7
0.31	0.13	7
0.31	0.13	7
0.31	0.13	7
0.31	0.13	7
0.31	0.13	7
0	0	8
0	0	8
0	0	8
0.01	0.12	8
0.02	0.12	8
0.03	0.08	8
0.05	0.17	8
0.06	0.3	8
0.06	0.65	8
0.08	1.2	8
0.09	1.56	8
0.1	1.67	8
0.11	0.16	8
0.12	0.16	8
0.13	0.16	8
0.15	0.12	8
0.16	0.14	8
0.17	0.14	8
0.18	0.14	8
0.19	0.12	8
0.21	0.12	8
0	0	9
0	0	9
0	0	9
0	0.05	9
0	0.05	9
0.01	0.02	9
0.02	0.12	9
0.04	0.08	9
0.05	0.09	9
0.06	0.09	9
0.08	0.06	9
0.09	0.12	9
0.1	0.16	9
0.11	0.16	9
0.12	0.15	9
0.14	0.16	9
0.15	0.17	9
0.16	0.18	9
0.18	0.21	9
0.19	0.23	9
0.2	0.25	9
0.21	0.28	9
0.22	0.31	9
0.23	0.36	9
0.25	0.28	9
0.26	0.36	9
0.27	0.44	9
0.29	0.55	9
0.3	0.68	9
0.31	0.81	9
0.33	1.02	9
0.34	1.25	9
0.35	1.31	9
0.36	0.2	9
0.38	0.28	9
0.39	0.15	9
0.4	0.12	9
0.41	0	9
0.42	0.08	9
0.44	-0.01	9
0.45	0.08	9
0.45	0.07	9
0	0.01	10
0	0.01	10
0	0.77	10
0.02	1.88	10
0.03	3.15	10
0.04	4.6	10
0.05	0.28	10
0.07	0.14	10
0.08	0.14	10
0.09	0.18	10
0.1	0.13	10
0.12	0.13	10
0.13	0.21	10
0.14	0.08	10
0.15	0.14	10
0.16	0.13	10
0	0.01	11
0	0.01	11
0	0.01	11
0	0.16	11
0.01	0.3	11
0.01	0.46	11
0.03	0.8	11
0.04	1.32	11
0.06	2.18	11
0.07	3.3	11
0.08	2.66	11
0.09	1.88	11
0.1	1.46	11
0.11	1.36	11
0.12	1.29	11
0.13	1.24	11
0.15	1.22	11
0.16	1.15	11
0.17	1.12	11
0.18	1.08	11
0.2	1.04	11
0.21	1.02	11
0.23	1	11
Species		Date		Sample information
B. craniifer		2012-10-19		Trial #	CSA (m2)	Grip Sep (mm)	Test Speed (mm/min)	Segment #	Individual #
Tensile Testing Raw Data				2	4.32e-07	3.18	1.5	T3 NS	1
				3	6.27e-07	2.99	1.5	T3 WS	1
Disp (mm)	Force (N)	Trial		4	7.48e-07	3.01	1.5	T2 NS	1
0	0.03	2		5	1.136e-06	1.99	1.5	T2 WS	1
0	0.03	2		6	4.977e-07	5.06	1.5	T3 NS	2
0	0.03	2		7	6.657e-07	3.05	1.5	T3 WS	2
0	0.04	2		8	9.196e-07	4.24	1.5	T2 NS	2
0	0.09	2		9	6.67e-07	2.93	1.5	T2 WS	2
0	0.14	2
0.01	0.19	2
0.02	0.22	2
0.04	0.26	2
0.05	0.3	2
0.06	0.32	2
0.07	0.35	2
0.09	0.38	2
0.1	0.41	2
0.11	0.44	2
0.12	0.46	2
0.14	0.49	2
0.15	0.52	2
0.16	0.54	2
0.17	0.59	2
0.19	0.66	2
0.2	0.72	2
0.21	0.78	2
0.22	0.89	2
0.23	1	2
0.25	1.13	2
0.26	1.32	2
0.27	1.51	2
0.29	1.73	2
0.3	2.03	2
0.31	2.22	2
0.32	2.34	2
0.34	2.43	2
0.35	2.44	2
0.36	2.42	2
0.37	2.54	2
0.39	2.81	2
0.4	3.18	2
0.41	3.49	2
0.42	3.9	2
0.43	4.4	2
0.45	4.82	2
0.46	5.19	2
0.47	5.57	2
0.48	5.62	2
0.5	5.52	2
0.51	5.39	2
0.52	5.13	2
0.53	4.89	2
0.55	4.7	2
0.56	4.53	2
0.59	3.51	2
0.59	3.45	2
0.59	3.4	2
0.59	3.37	2
0.59	3.33	2
0	0.08	3
0	0.07	3
0	0.09	3
0	0.4	3
0.02	1.06	3
0.04	3.13	3
0.05	4.88	3
0.05	6.55	3
0.06	8.95	3
0.07	11.01	3
0.08	13.06	3
0.1	15.22	3
0.11	15.99	3
0.12	16.68	3
0.14	16.06	3
0.15	15.53	3
0.16	14.87	3
0.17	13.98	3
0.18	13.13	3
0.2	12.36	3
0.21	11.25	3
0.22	9.94	3
0.23	8.75	3
0.25	7.38	3
0.26	6.53	3
0.27	5.63	3
0.29	4.69	3
0.3	4.06	3
0.31	3.63	3
0.32	3.25	3
0.34	3.01	3
0.35	2.78	3
0.36	2.54	3
0.37	2.34	3
0.39	2.1	3
0	0.03	4
0	0	4
0	0.01	4
0	0.7	4
0.01	3.46	4
0.02	5.64	4
0.03	8.29	4
0.04	11.63	4
0.05	13.35	4
0.07	15.11	4
0.08	11.97	4
0.09	10.86	4
0.09	9.84	4
0.1	8.84	4
0.11	8.01	4
0.13	7.13	4
0.14	6.25	4
0.15	5.62	4
0.17	5.12	4
0.18	4.71	4
0.19	4.4	4
0.2	4.07	4
0.22	3.73	4
0.23	3.48	4
0.24	3.28	4
0.25	3.02	4
0.26	2.8	4
0.28	2.61	4
0.28	2.24	4
0	0.17	5
0	0.17	5
0	0.17	5
0	0.17	5
0	0.51	5
0.01	2.76	5
0.02	4.93	5
0.04	7.69	5
0.05	10.29	5
0.05	12.98	5
0.06	16.09	5
0.07	18.36	5
0.08	20.47	5
0.1	21.22	5
0.1	16.53	5
0.12	15.8	5
0.13	14.55	5
0.14	13.89	5
0.15	13.09	5
0.17	11.61	5
0.18	9.84	5
0.19	8.25	5
0.21	5.66	5
0.22	4.37	5
0.23	3.66	5
0.25	3.01	5
0.26	2.66	5
0.27	2.34	5
0.28	2.05	5
0.29	1.89	5
0.31	1.76	5
0.32	1.6	5
0.33	1.5	5
0.34	1.41	5
0.35	1.29	5
0.36	1.18	5
0	0	6
0	0	6
0	-0.01	6
0	-0.01	6
0	-0.01	6
0.01	0.28	6
0.02	0.44	6
0.03	0.57	6
0.04	0.74	6
0.05	1.02	6
0.05	1.45	6
0.07	2.23	6
0.08	3.28	6
0.09	4.52	6
0.1	6.44	6
0.12	7.98	6
0.13	9.47	6
0.13	10.53	6
0.14	11.03	6
0.15	12.03	6
0.16	11.51	6
0.18	12.03	6
0.19	12.42	6
0.2	12.56	6
0.21	11.93	6
0.23	10.93	6
0.23	11.17	6
0.25	11.47	6
0.26	11.52	6
0.27	10.58	6
0.28	8.96	6
0.3	8.26	6
0.31	7.71	6
0.32	6.95	6
0.33	6.37	6
0.34	5.28	6
0.36	4.19	6
0.37	3.42	6
0.38	2.88	6
0.39	2.49	6
0	-0.07	7
0	-0.04	7
0	-0.04	7
0	-0.04	7
0	1.89	7
0.01	3.5	7
0.02	5.24	7
0.03	7.55	7
0.04	9.47	7
0.06	11.17	7
0.07	12.85	7
0.08	13.7	7
0.08	14.01	7
0.1	14.1	7
0.11	13.93	7
0.12	13.79	7
0.13	13.78	7
0.15	13.7	7
0.16	13.53	7
0.17	13.34	7
0.18	13.17	7
0.19	11.04	7
0.21	11.09	7
0.22	10.98	7
0.23	10.77	7
0.24	10.37	7
0.25	10.11	7
0.27	9.87	7
0.28	9.65	7
0.29	9.49	7
0.31	9.14	7
0.32	8.36	7
0.33	7.68	7
0.34	7.03	7
0.36	6.2	7
0.37	5.11	7
0.38	4.9	7
0.4	4.82	7
0.41	4.84	7
0.42	4.83	7
0.43	4.87	7
0.44	4.91	7
0.45	4.9	7
0.47	4.87	7
0.48	4.82	7
0.49	4.77	7
0.51	4.7	7
0.52	4.64	7
0.53	4.58	7
0.55	4.5	7
0.56	4.4	7
0.57	4.27	7
0.58	4.05	7
0.6	3.87	7
0.61	3.77	7
0.62	3.71	7
0.63	3.67	7
0.65	3.63	7
0.66	3.58	7
0.67	3.54	7
0.68	3.49	7
0.69	3.45	7
0.71	3.39	7
0.72	3.35	7
0.73	3.3	7
0.74	3.26	7
0.76	3.16	7
0.77	3.1	7
0.78	3.05	7
0.79	3.01	7
0.81	2.96	7
0.82	2.91	7
0.83	2.86	7
0.84	2.81	7
0.85	2.76	7
0.87	2.72	7
0.88	2.66	7
0.89	2.49	7
0	0	8
0	0	8
0	0	8
0.01	0.02	8
0.02	0.05	8
0.03	0.18	8
0.04	0.28	8
0.05	3.87	8
0.06	7.48	8
0.08	11.14	8
0.09	14.94	8
0.1	17.83	8
0.11	20.48	8
0.12	23.33	8
0.13	25.42	8
0.15	27.13	8
0.16	28.71	8
0.17	29.74	8
0.18	30.09	8
0.21	2.47	8
0.21	2.32	8
0.22	2.2	8
0.24	2.09	8
0.25	2.02	8
0.26	1.95	8
0.27	1.85	8
0.28	1.79	8
0.3	1.72	8
0.31	1.64	8
0.32	1.58	8
0.33	1.52	8
0.35	1.48	8
0.36	1.45	8
0.37	1.43	8
0.38	1.4	8
0.39	1.29	8
0.39	1.25	8
0.39	1.23	8
0	0	9
0	0	9
0	0	9
0	0	9
0	0.16	9
0.02	0.41	9
0.03	0.58	9
0.04	0.74	9
0.05	0.94	9
0.06	1.2	9
0.08	1.5	9
0.09	1.9	9
0.1	2.3	9
0.11	2.82	9
0.12	3.44	9
0.14	3.99	9
0.15	4.68	9
0.16	5.74	9
0.17	6.65	9
0.18	7.46	9
0.2	8.48	9
0.21	9.04	9
0.22	9.35	9
0.23	9.63	9
0.25	9.69	9
0.26	10.22	9
0.27	10.84	9
0.29	11.41	9
0.3	11.93	9
0.31	12.15	9
0.32	12.32	9
0.33	12.09	9
0.35	11.38	9
0.36	11.14	9
0.37	10.86	9
0.38	10.18	9
0.39	9.43	9
0.41	8.47	9
0.42	7.65	9
0.44	6.76	9
0.45	5.74	9
0.46	5.09	9
0.47	4.42	9
0.49	3.84	9
0.5	3.39	9
0.51	3.04	9
0.52	2.76	9
0.54	2.52	9
0.54	2.26	9
0.56	1.89	9
Species		Date		Sample information
B. craniifer		2012-11-16		Trial #	CSA (m2)	Grip Sep (mm)	Test Speed (mm/min)	Segment #	Individual #
Tensile Testing Raw Data				1	5.6e-08	2.85	1.5	2	1
				2	2.121e-07	4.75	1.5	3	1
Disp (mm)	Force (N)	Trial		3	1.476e-07	3.87	1.5	4	1
0	0	1		4	1.375e-07	5	1.5	5	1
0	0	1		5	7.74e-08	3.65	1.5	6	1
0	0	1		6	3.488e-07	4.96	1.5	T2	1
0	0.01	1		7	1.024e-07	3.06	1.5	2	2
0	0.01	1		8	1.88e-07	3.28	1.5	3	2
0.05	0.04	1		9	2.508e-07	2.77	1.5	4	2
0.05	0.02	1		10	1.065e-07	3.86	1.5	5	2
0.06	0.02	1		11	1.48e-07	3.73	1.5	6	2
0.06	0.02	1		12	4.27e-07	3.3	1.5	T3	2
0.08	0.04	1
0.08	0.04	1
0.1	0.05	1
0.11	0	1
0.12	0.09	1
0.14	0.17	1
0.14	0.1	1
0.16	0.1	1
0.18	0.06	1
0.18	0.12	1
0.19	0.2	1
0.21	0.26	1
0.21	0.33	1
0.23	0.46	1
0.24	0.65	1
0.25	0.83	1
0.27	0.64	1
0.28	0.38	1
0.29	0.34	1
0.31	0.21	1
0.32	0.18	1
0.33	0.16	1
0.34	0.13	1
0.35	0.12	1
0.37	0.11	1
0.38	0.11	1
0.39	0.09	1
0.4	0.06	1
0.42	0.08	1
0.43	0.08	1
0.44	0.08	1
0.45	0.08	1
0.47	0.16	1
0.47	0.07	1
0.47	0.07	1
0.47	0.07	1
0.47	0.07	1
0	0	2
0	0	2
0	0	2
0	0	2
0.01	0	2
0.03	0.04	2
0.04	0.01	2
0.05	0.01	2
0.07	0	2
0.08	-0.06	2
0.09	-0.06	2
0.09	0.01	2
0.11	0.01	2
0.11	0.01	2
0.12	0.01	2
0.13	0.01	2
0.15	0.01	2
0.16	0.01	2
0.17	0.02	2
0.18	0.02	2
0.2	0.02	2
0.2	0.01	2
0.22	0.02	2
0.23	0.02	2
0.24	0.03	2
0.25	0.03	2
0.27	0.04	2
0.28	0.05	2
0.29	0.06	2
0.3	0.06	2
0.32	0.08	2
0.33	0.09	2
0.34	0.11	2
0.36	0.13	2
0.37	0.14	2
0.38	0.13	2
0.39	0.16	2
0.4	0.19	2
0.42	0.19	2
0.43	0.18	2
0.44	0.18	2
0.46	0.19	2
0.47	0	2
0.48	0.01	2
0.5	0	2
0.51	0	2
0.52	0	2
0	0	3
0	0	3
0	0	3
0	0	3
0.01	0.01	3
0.03	-0.04	3
0.04	-0.07	3
0.05	-0.05	3
0.06	0.04	3
0.07	0	3
0.07	0.08	3
0.09	-0.03	3
0.1	0	3
0.11	0.03	3
0.12	0.03	3
0.14	0.03	3
0.15	0.04	3
0.16	0.05	3
0.17	0.05	3
0.18	0.06	3
0.2	0.07	3
0.21	0.09	3
0.22	0.15	3
0.23	0.13	3
0.25	0.2	3
0.26	0.28	3
0.27	0.42	3
0.28	0.68	3
0.29	0.92	3
0.3	1.14	3
0.32	0.8	3
0.33	0.49	3
0.34	0.35	3
0.35	0.3	3
0.37	0.29	3
0.38	0.27	3
0.39	0.27	3
0.4	0.27	3
0.42	0.26	3
0.43	0.26	3
0.44	0.26	3
0.45	0.26	3
0.47	0.26	3
0.48	0.26	3
0.49	0.27	3
0.5	0.27	3
0.52	0.27	3
0.52	0.27	3
0.54	0.27	3
0	0	4
0	0	4
0	0.01	4
0	0.01	4
0.01	0.01	4
0.03	0.01	4
0.04	0.1	4
0.05	-0.03	4
0.07	0.02	4
0.08	0.02	4
0.09	0.03	4
0.1	0.02	4
0.1	0.04	4
0.12	0.05	4
0.12	0.06	4
0.13	0.07	4
0.15	0.09	4
0.16	0.12	4
0.17	0.15	4
0.18	0.19	4
0.2	0.26	4
0.21	0.33	4
0.22	0.42	4
0.23	0.54	4
0.24	0.59	4
0.26	0.61	4
0.27	0.29	4
0.28	0.17	4
0.29	0.14	4
0.31	0.12	4
0.32	0.11	4
0.33	0.11	4
0	0	5
0	0	5
0	0	5
0	0	5
0.01	0	5
0.02	0	5
0.03	0	5
0.05	0	5
0.05	0	5
0.06	0	5
0.08	0	5
0.09	0.01	5
0.1	0.01	5
0.11	0.01	5
0.12	-0.03	5
0.14	0.01	5
0.15	0.01	5
0.16	-0.04	5
0.17	0.01	5
0.18	0.02	5
0.2	0.01	5
0.21	0.02	5
0.22	0.02	5
0.23	0.02	5
0.24	0.02	5
0.26	0.02	5
0.27	0.02	5
0.28	0.02	5
0.29	0.03	5
0.3	0.02	5
0.31	0.02	5
0.33	0.03	5
0.34	0.03	5
0.35	0.03	5
0.37	-0.02	5
0.38	0.03	5
0.39	0.04	5
0.4	0.02	5
0.41	0.04	5
0.43	0.04	5
0.44	0.05	5
0.45	0.1	5
0.46	0.05	5
0.47	0.05	5
0.48	0.05	5
0.5	0.06	5
0.51	0.06	5
0.52	0.07	5
0.53	0.07	5
0.55	0.08	5
0.56	0.09	5
0.57	0.09	5
0.58	0.1	5
0.6	0.11	5
0.61	0.08	5
0.62	0.14	5
0.63	0.17	5
0.65	0.2	5
0.66	0.24	5
0.66	0.3	5
0.68	0.39	5
0.69	0.46	5
0.71	0.57	5
0.72	0.76	5
0.73	0.79	5
0.74	0.05	5
0.76	0	5
0.77	0.11	5
0.78	0.1	5
0.8	0.03	5
0.81	0.03	5
0.82	-0.06	5
0.83	0.02	5
0.84	0.02	5
0.86	0.03	5
0	0	6
0	0	6
0	0.05	6
0.02	0.11	6
0.02	0.14	6
0.02	0.19	6
0.04	0.21	6
0.04	0.23	6
0.06	0.28	6
0.07	0.41	6
0.08	0.32	6
0.1	0.45	6
0.1	0.47	6
0.12	0.64	6
0.13	0.82	6
0.15	1.06	6
0.16	1.41	6
0.17	1.76	6
0.18	1.65	6
0.19	1.18	6
0.21	0.98	6
0.22	0.82	6
0.23	0.75	6
0.25	0.68	6
0.26	0.64	6
0.27	0.6	6
0.28	0.53	6
0.3	0.44	6
0.31	0.35	6
0.32	0.28	6
0.33	0.22	6
0.34	0.21	6
0.36	0.19	6
0	0	7
0	0	7
0	0	7
0	0	7
0.01	-0.02	7
0.03	-0.01	7
0.04	0.03	7
0.05	0.02	7
0.06	0.11	7
0.07	0.03	7
0.08	0.05	7
0.09	0.04	7
0.1	0.05	7
0.12	0.08	7
0.13	0.08	7
0.14	0.12	7
0.15	0.15	7
0.16	0.19	7
0.18	0.21	7
0.19	0.29	7
0.2	0.37	7
0.21	0.46	7
0.22	0.56	7
0.24	0.12	7
0.25	0.11	7
0.26	0.12	7
0.27	0.08	7
0.28	0.07	7
0.3	0.06	7
0.31	0.06	7
0.32	0.05	7
0.33	0.05	7
0.35	-0.01	7
0.36	0.03	7
0.37	0.05	7
0.38	0.04	7
0	0	8
0	0	8
0	0	8
0	0	8
0.01	0.01	8
0.02	0.01	8
0.04	-0.07	8
0.05	-0.03	8
0.07	0.01	8
0.08	0.09	8
0.09	0.05	8
0.1	0.13	8
0.11	0.02	8
0.12	0.04	8
0.14	0.02	8
0.15	0.11	8
0.16	0.07	8
0.17	0.07	8
0.19	0.11	8
0.2	-0.05	8
0.21	0.04	8
0.22	0.04	8
0.23	0.1	8
0.25	0.05	8
0.26	0.06	8
0.27	0.02	8
0.28	-0.02	8
0.3	0.02	8
0.31	0.07	8
0.32	0.11	8
0.33	0.05	8
0.34	0.11	8
0.35	0.11	8
0.37	0.11	8
0.38	0.15	8
0.39	0.17	8
0.41	0.28	8
0.42	0.2	8
0.43	0.31	8
0.44	0.28	8
0.46	0.3	8
0.47	0.32	8
0.49	0.36	8
0.5	0.38	8
0.51	0.38	8
0.52	0.21	8
0.53	0.11	8
0.55	0.11	8
0.56	0.01	8
0.57	0.16	8
0.58	0.16	8
0.6	0.04	8
0.61	0.06	8
0.62	0.05	8
0.63	0.14	8
0.65	0.02	8
0.66	0.03	8
0.67	-0.04	8
0.69	0.03	8
0.7	0	8
0	0	9
0	0	9
0	0.04	9
0	0.01	9
0.02	-0.03	9
0.03	0.12	9
0.04	0.05	9
0.05	0.03	9
0.06	-0.02	9
0.07	0.1	9
0.08	0.12	9
0.09	0.05	9
0.1	0.06	9
0.12	-0.03	9
0.13	0.07	9
0.14	0.08	9
0.15	0.09	9
0.17	0.04	9
0.18	0.1	9
0.19	0.11	9
0.21	0.12	9
0.22	0.13	9
0.23	0.09	9
0.24	0.17	9
0.25	0.13	9
0.26	0.21	9
0.28	0.25	9
0.29	0.29	9
0.3	0.3	9
0.31	0.31	9
0.33	0.29	9
0.34	0.32	9
0.35	0.23	9
0.36	0.32	9
0.38	0.37	9
0.39	0.04	9
0.4	0.04	9
0.41	0.05	9
0.43	0.04	9
0.44	0.1	9
0.45	0.1	9
0.46	0.12	9
0.47	0.09	9
0.49	0.04	9
0.5	0.04	9
0.51	-0.05	9
0.52	-0.05	9
0.54	-0.03	9
0.55	0.13	9
0.56	0.02	9
0.58	0.06	9
0	0	10
0	0	10
0	0	10
0	-0.01	10
0.02	0	10
0.03	0.01	10
0.04	0	10
0.05	0	10
0.07	0.01	10
0.08	-0.07	10
0.09	0	10
0.11	0	10
0.12	0.01	10
0.13	0.01	10
0.15	0.07	10
0.16	-0.02	10
0.17	0.03	10
0.18	0	10
0.19	-0.01	10
0.2	0	10
0.22	-0.02	10
0.23	0.02	10
0.24	0.02	10
0.25	0.02	10
0.26	0.02	10
0.27	0.03	10
0.29	0.04	10
0.3	0.06	10
0.31	0.06	10
0.32	0.08	10
0.34	0.1	10
0.35	0.1	10
0.37	0.21	10
0.37	0.18	10
0.39	0.16	10
0.4	0.24	10
0.41	0.26	10
0.42	0.19	10
0.44	0.11	10
0.45	0.1	10
0.46	0.09	10
0.47	0.08	10
0.48	0.15	10
0.5	0.03	10
0.51	0.05	10
0.52	0.07	10
0.53	0.04	10
0.55	0.01	10
0.56	0.06	10
0.57	0.07	10
0.58	0.12	10
0.6	0.06	10
0.61	0.04	10
0.62	0.04	10
0.63	0.03	10
0.64	0.04	10
0.64	0.03	10
0	0	11
0	0	11
0	0	11
0.02	0	11
0.02	0	11
0.04	0	11
0.05	0	11
0.06	0.01	11
0.08	0.01	11
0.09	0.01	11
0.1	0.01	11
0.11	0.03	11
0.12	0.02	11
0.13	0.02	11
0.15	0.05	11
0.16	0.02	11
0.17	0.07	11
0.18	0.02	11
0.19	0.03	11
0.21	0.03	11
0.22	0.05	11
0.23	0.06	11
0.24	0.09	11
0.26	0.13	11
0.27	0.16	11
0.28	0.22	11
0.3	0.23	11
0.31	0.22	11
0.32	0.18	11
0.33	0.13	11
0.34	0.12	11
0.35	0.15	11
0.37	0.08	11
0.38	0.09	11
0.39	0.08	11
0.4	0.07	11
0.41	0.07	11
0.43	0.07	11
0	0	12
0	0	12
0	0.02	12
0	0.15	12
0.01	0.25	12
0.02	0.5	12
0.02	0.57	12
0.03	0.74	12
0.04	1.2	12
0.06	1.65	12
0.06	2.08	12
0.08	2.35	12
0.09	1.67	12
0.1	1.77	12
0.11	1.87	12
0.12	1.91	12
0.14	1.83	12
0.15	1.6	12
0.16	1.47	12
0.18	1.39	12
0.19	1.35	12
0.2	1.29	12
0.21	1.18	12
0.22	0.75	12
0.23	0.51	12
0.25	0.43	12
0.26	0.41	12
0.27	0.31	12
0.28	0.32	12
0.3	0.29	12
0.31	0.28	12
0.32	0.18	12
0.33	0.26	12
0.35	0.3	12
0.36	0.26	12

## Sheet: American-Tensile
Species		Date		Sample information
P. americana		2012-02-24		Trial #	CSA (m2)	Grip Sep (mm)	Test Speed (mm/min)	Segment #	Individual #
Tensile Testing Raw Data				2	3.515e-07	5.42	1.5	3	1
				3	4.62e-07	5	1.5	4	1
				6	3.42e-07	4.77	1.5	2	2
				9	3.61e-07	3.58	1.5	5	2
				12	2.62e-07	3.98	1.5	4	3
Disp (mm)	Force (N)	Trial		13	2.6e-07	2.61	1.5	5	3
0	0	2		14	2.9e-07	2.3	1.5	6	3
0	0	2
0	0	2
0	0	2
0	0	2
0	0	2
0	0	2
0	0.01	2
0	0.01	2
0	0.01	2
0	0.01	2
0.01	0.01	2
0.01	0.01	2
0.01	0.01	2
0.02	0.01	2
0.03	0.02	2
0.04	0.02	2
0.05	0.02	2
0.07	0.03	2
0.08	0.03	2
0.09	0.04	2
0.1	0.04	2
0.12	0.05	2
0.13	0.05	2
0.13	0.06	2
0.14	0.07	2
0.16	0.08	2
0.17	0.1	2
0.18	0.12	2
0.19	0.14	2
0.21	0.17	2
0.22	0.21	2
0.23	0.26	2
0.24	0.34	2
0.25	0.01	2
0.26	0.06	2
0.28	0.03	2
0.29	0.02	2
0.3	0.02	2
0.32	0.01	2
0.33	0.01	2
0.34	0.01	2
0.36	0.01	2
0.37	0.01	2
0.38	0	2
0.39	0.01	2
0.4	0	2
0.4	0.01	2
0	0	3
0	0	3
0	0	3
0	0	3
0	0	3
0	0.01	3
0	0.01	3
0	0.02	3
0	0.03	3
0	0.04	3
0	0.04	3
0.01	0.05	3
0.01	0.06	3
0.02	0.08	3
0.02	0.11	3
0.03	0.15	3
0.04	0.05	3
0.05	0.07	3
0.07	0.03	3
0.08	0.02	3
0.09	0.02	3
0.1	0.02	3
0.11	0.01	3
0.12	0	3
0.13	0.01	3
0.13	0.01	3
0.15	0.01	3
0.16	0.01	3
0.17	0.01	3
0.18	0.01	3
0.19	0.01	3
0.21	0.01	3
0.22	0.01	3
0.23	0.01	3
0	0	6
0	0	6
0	0	6
0	0	6
0	0	6
0.01	0.01	6
0.01	0.02	6
0.02	0.03	6
0.03	0.05	6
0.04	0.07	6
0.05	0.1	6
0.06	0.14	6
0.07	0.19	6
0.08	0.28	6
0.1	0.42	6
0.11	0.57	6
0.12	0.72	6
0.13	0.9	6
0.15	1.01	6
0.16	0.01	6
0.17	0.01	6
0.18	0.01	6
0.19	0.01	6
0.21	0.01	6
0.21	0.01	6
0.22	0.01	6
0.24	0.01	6
0.25	0.01	6
0.26	0.01	6
0	0	9
0	0.01	9
0	0	9
0.01	0.01	9
0.02	0.01	9
0.03	0.01	9
0.04	0.02	9
0.05	0.02	9
0.06	0.02	9
0.08	0.03	9
0.08	0.03	9
0.09	0.03	9
0.1	0.03	9
0.11	0.04	9
0.12	0.04	9
0.14	0.04	9
0.15	0.04	9
0.16	0.05	9
0.17	0.05	9
0.18	0.05	9
0.2	0.06	9
0.21	0.06	9
0.22	0.06	9
0.23	0.06	9
0.25	0.07	9
0.26	0.07	9
0.27	0.07	9
0.29	0.07	9
0.3	0.07	9
0.31	0.08	9
0.32	0.08	9
0.34	0.09	9
0.35	0.09	9
0.36	0.02	9
0.37	0.03	9
0.38	0.03	9
0.4	0.03	9
0.41	0.04	9
0.42	0.04	9
0.43	0.04	9
0.45	0.05	9
0.46	0.05	9
0.48	0.05	9
0.49	0.05	9
0.5	0.05	9
0.51	0.05	9
0	0	12
0	0	12
0	0	12
0	0	12
0	0	12
0	0.01	12
0	0.01	12
0	0.03	12
0	0.05	12
0	0.1	12
0	0.15	12
0.01	0.26	12
0.01	0.43	12
0.02	0	12
0.03	-0.01	12
0.04	-0.01	12
0.05	-0.01	12
0.06	0	12
0.07	-0.01	12
0.09	0	12
0.1	0	12
0.11	0	12
0.12	-0.01	12
0.13	0	12
0.14	-0.01	12
0.15	0	12
0.16	-0.01	12
0.17	-0.01	12
0.17	-0.01	12
0	0	13
0	0	13
0	0	13
0	0	13
0	0.01	13
0	0.01	13
0	0.01	13
0	0.01	13
0	0.02	13
0	0.03	13
0	0.05	13
0.01	0.06	13
0.01	0.08	13
0.02	0.11	13
0.03	0.18	13
0.04	0.3	13
0.05	0.02	13
0.06	0.01	13
0.08	0.01	13
0.09	0.01	13
0.1	0.01	13
0.11	0.01	13
0.12	0.01	13
0.13	0.01	13
0.14	0.01	13
0.15	0.01	13
0.16	0.01	13
0.17	0.01	13
0.19	0.01	13
0.2	0.01	13
0.21	0.01	13
0.22	0.01	13
0.23	0.01	13
0.25	0.01	13
0.26	0.01	13
0.27	0.01	13
0.28	0.01	13
0	0	14
0	0	14
0	0	14
0	0	14
0	0	14
0	0.01	14
0	0.01	14
0	0.01	14
0	0.01	14
0	0.02	14
0	0.01	14
0.01	0.01	14
0.01	0.02	14
0.01	0.02	14
0.02	0.03	14
0.03	0.03	14
0.03	0.04	14
0.04	0.04	14
0.06	0.05	14
0.07	0.06	14
0.08	0.06	14
0.09	0.08	14
0.11	0.09	14
0.12	0.11	14
0.13	0.14	14
0.13	0.2	14
0.15	0.34	14
0.16	0.53	14
0.17	0.74	14
0.18	0.74	14
0.19	0.7	14
0.2	0.72	14
0.22	0.74	14
0.23	0.1	14
0.24	0.1	14
0.25	0.09	14
0.27	0.08	14
0.28	0.07	14
0.29	0.06	14
0.3	0.06	14
0.32	0.05	14
0.33	0.05	14
0.34	0.05	14
0.35	0.05	14
0.37	0.04	14
0.38	0.04	14
0.39	0.04	14
0.4	0.04	14
0.41	0.04	14
0.43	0.04	14
0.44	0.04	14
0.45	0.04	14
0.46	0.04	14
0.48	0.03	14
Species		Date		Sample information
P. americana		2012-03-02		Trial #	CSA (m2)	Grip Sep (mm)	Test Speed (mm/min)	Segment #	Individual #
Tensile Testing Raw Data				1	1.2e-07	4.51	1.5	2	1
				3	8.25e-08	4.71	1.5	4	1
				4	8.7e-08	5.21	1.5	5	1
				5	9e-08	4.29	1.5	6	1
				6	7.65e-08	3.51	1.5	2	2
Disp (mm)	Force (N)	Trial		7	9.6e-08	4.19	1.5	3	2
0	0	1		8	6.72e-08	4.56	1.5	4	2
0	0	1		11	6e-08	4.12	1.5	2	3
0	0	1		12	3.6e-08	5.16	1.5	3	3
0	0	1		13	6.75e-08	5.76	1.5	4	3
0	0	1		14	7.65e-08	2.99	1.5	5	3
0	0	1
0	0	1
0.01	0	1
0.01	0	1
0.02	0	1
0.03	0	1
0.04	0	1
0.05	0.01	1
0.06	0.02	1
0.07	0.02	1
0.08	0.02	1
0.1	0.02	1
0.11	0.03	1
0.12	0.03	1
0.13	0.03	1
0.13	0.04	1
0.14	0.04	1
0.16	0.05	1
0.17	0.05	1
0.18	0.06	1
0.19	0.07	1
0.21	0.08	1
0.22	0.09	1
0.23	0.13	1
0.24	0.15	1
0.25	0.18	1
0.27	0.22	1
0.28	0.27	1
0.29	0.33	1
0.3	0.13	1
0.32	0.14	1
0.33	0.01	1
0.34	0	1
0.35	0	1
0.36	0.01	1
0.38	0	1
0.38	0	1
0	0	3
0	0	3
0	0	3
0	0	3
0	0	3
0.01	0	3
0.02	0.01	3
0.03	0.01	3
0.05	0.01	3
0.06	0.01	3
0.07	0.01	3
0.08	0.02	3
0.09	0.02	3
0.1	0.02	3
0.11	0.03	3
0.12	0.03	3
0.13	0.04	3
0.14	0.05	3
0.15	0.05	3
0.17	0.06	3
0.18	0.07	3
0.19	0.08	3
0.2	0.09	3
0.22	0.11	3
0.23	0.13	3
0.24	0.16	3
0.25	0.2	3
0.26	0.23	3
0.28	0.26	3
0.29	0.29	3
0.3	0.3	3
0.31	0.3	3
0.32	0.29	3
0.33	0.29	3
0.34	0.31	3
0.36	0.33	3
0.37	0.35	3
0.38	0.18	3
0.4	0.09	3
0.41	0.05	3
0.42	0.04	3
0.43	0.03	3
0.44	0.03	3
0.45	0.02	3
0.47	0.01	3
0.48	0.02	3
0.49	0.02	3
0.5	0.02	3
0.51	0.02	3
0.52	0.02	3
0	0	4
0	0	4
0	0	4
0	0	4
0	0.01	4
0	0.01	4
0	0.01	4
0	0.02	4
0	0.03	4
0	0.04	4
0	0.06	4
0.01	0.08	4
0.01	0.1	4
0.02	0.13	4
0.03	0.19	4
0.04	0.26	4
0.05	0.35	4
0.06	0.43	4
0.07	0.43	4
0.08	0.33	4
0.1	0.02	4
0.11	0.02	4
0.12	0.01	4
0.12	0	4
0.13	-0.01	4
0.14	-0.01	4
0.15	0	4
0.17	-0.01	4
0.18	0	4
0.19	0	4
0.21	0	4
0.21	0	4
0.23	0	4
0	0	5
0	0	5
0	0	5
0	0	5
0	0	5
0.01	0	5
0.02	0	5
0.03	0.01	5
0.04	0.01	5
0.06	0.01	5
0.07	0.01	5
0.08	0.01	5
0.1	0.02	5
0.11	0.02	5
0.11	0.02	5
0.13	0.03	5
0.14	0.04	5
0.15	0.04	5
0.16	0.05	5
0.17	0.06	5
0.19	0.08	5
0.2	0.1	5
0.21	0.12	5
0.22	0.14	5
0.24	0.17	5
0.25	0.03	5
0.26	0.01	5
0.27	0	5
0.29	0	5
0.3	0	5
0.31	0	5
0.32	0	5
0.33	0	5
0.34	0	5
0	0	6
0	0	6
0	0	6
0	0	6
0	0	6
0	0	6
0	0	6
0	0	6
0	0	6
0	0	6
0	0.01	6
0.01	0.01	6
0.01	0.01	6
0.02	0.01	6
0.02	0.01	6
0.03	0.01	6
0.04	0.02	6
0.05	0.02	6
0.06	0.02	6
0.07	0.02	6
0.08	0.02	6
0.1	0.03	6
0.11	0.04	6
0.12	0.05	6
0.13	0.06	6
0.14	0.07	6
0.15	0.09	6
0.16	0.11	6
0.18	0.15	6
0.19	0.18	6
0.2	0.12	6
0.21	0.04	6
0.23	0.02	6
0.24	0	6
0.25	0	6
0.26	0	6
0.27	0	6
0.29	0	6
0	0	7
0	0	7
0	0	7
0	0	7
0	0	7
0	0	7
0.01	0	7
0.01	0	7
0.01	0	7
0.02	0.01	7
0.02	0.02	7
0.04	0.03	7
0.05	0.04	7
0.05	0.04	7
0.07	0.05	7
0.08	0.06	7
0.09	0.07	7
0.1	0.08	7
0.12	0.09	7
0.13	0.09	7
0.14	0.09	7
0.14	0.07	7
0.16	0	7
0.17	0	7
0.18	0	7
0.19	0	7
0.21	0	7
0.22	0	7
0.23	0	7
0	0	8
0	0	8
0	0	8
0	0	8
0	0	8
0	0	8
0	0	8
0	0	8
0	0	8
0	0.01	8
0	0	8
0.01	0.01	8
0.01	0.02	8
0.02	0.02	8
0.03	0.03	8
0.04	0.05	8
0.05	0.07	8
0.06	0.11	8
0.07	0.16	8
0.08	0.21	8
0.09	0.19	8
0.11	-0.03	8
0.12	0	8
0.13	0	8
0.14	0	8
0.15	0	8
0.16	0	8
0.17	0	8
0.18	0	8
0.19	0	8
0	0	11
0	0	11
0	0.01	11
0	0	11
0	0.01	11
0	0.01	11
0.01	0.02	11
0.01	0.02	11
0.02	0.02	11
0.02	0.02	11
0.03	0.04	11
0.04	0.04	11
0.05	0.04	11
0.07	0.05	11
0.08	0.07	11
0.09	0.08	11
0.1	0.1	11
0.12	0.13	11
0.13	0.17	11
0.14	0.23	11
0.15	0	11
0.16	0	11
0.17	0	11
0.19	0	11
0.2	0.01	11
0	0	12
0	0	12
0	0	12
0	0	12
0	0	12
0	-0.01	12
0	0	12
0	0	12
0	0	12
0	0	12
0	0	12
0.01	0	12
0.01	0.01	12
0.02	0.01	12
0.02	0.01	12
0.03	0.01	12
0.04	0.02	12
0.05	0.02	12
0.07	0.03	12
0.08	0.03	12
0.09	0.04	12
0.1	0.01	12
0.11	0	12
0.12	0	12
0.12	0	12
0.13	0	12
0.14	0	12
0.16	0	12
0.17	0	12
0.18	0	12
0.2	0.01	12
0.21	0	12
0.22	0	12
0	0	13
0	0	13
0	0	13
0	0	13
0	0	13
0	0	13
0.01	0	13
0.02	0	13
0.02	0.01	13
0.03	0.01	13
0.04	0.01	13
0.05	0.02	13
0.06	0.02	13
0.08	0.03	13
0.09	0.03	13
0.1	0.04	13
0.11	0.05	13
0.12	0.07	13
0.12	0.08	13
0.14	0.12	13
0.15	0.17	13
0.16	-0.03	13
0.17	0	13
0.19	0	13
0.2	0	13
0.21	0	13
0.22	0	13
0.23	0	13
0	0	14
0	0	14
0	0	14
0	0	14
0	0	14
0	0	14
0	0.01	14
0	0.01	14
0	0.01	14
0	0.01	14
0	0.01	14
0	0.01	14
0.01	0.01	14
0.01	0.01	14
0.02	0.02	14
0.02	0.02	14
0.03	0.02	14
0.04	0.02	14
0.06	0.02	14
0.07	0.02	14
0.08	0.02	14
0.1	0.03	14
0.11	0.03	14
0.12	0.03	14
0.13	0.04	14
0.13	0.05	14
0.15	0.06	14
0.16	0.07	14
0.17	0.08	14
0.18	0.1	14
0.19	0.13	14
0.2	0.18	14
0.22	0.26	14
0.23	0.01	14
0.24	0.02	14
0.26	0.01	14
0.27	0.01	14
0.28	0.01	14
0.3	0.01	14
0.31	0.01	14
Species		Date		Sample information
P. americana		2012-04-24		Trial #	CSA (m2)	Grip Sep (mm)	Test Speed (mm/min)	Segment #	Individual #
Tensile Testing Raw Data				1	4.8e-08	1.88	1.5	T2	1
				3	1.04e-07	3.46	1.5	T3	2
				5	1.352e-07	2.77	1.5	T2	3
				6	5.18e-08	3.29	1.5	T3	3
Disp (mm)	Force (N)	Trial
0	0	1
0	0	1
0	0	1
0	0.01	1
0.01	0.02	1
0.02	0.03	1
0.03	0.04	1
0.05	0.05	1
0.06	0.05	1
0.07	0.06	1
0.08	0.07	1
0.09	0.08	1
0.11	0.09	1
0.12	0.1	1
0.13	0.1	1
0.14	0.1	1
0.16	0.09	1
0.17	0.09	1
0.18	0.09	1
0.19	0.09	1
0.2	0.09	1
0.22	0.09	1
0.23	0.08	1
0.24	0.08	1
0.26	0.07	1
0.27	0.07	1
0.28	0.07	1
0.29	0.07	1
0.3	0.07	1
0.31	0.07	1
0.33	0.07	1
0.34	0.06	1
0.35	0.06	1
0.36	0.06	1
0.37	0.05	1
0.39	0.05	1
0.4	0.04	1
0.41	0.04	1
0.42	0.03	1
0.44	0.02	1
0.45	0.02	1
0.46	0.02	1
0.48	0.02	1
0.49	0.02	1
0.5	0.02	1
0.51	0.02	1
0.52	0.02	1
0.53	0.02	1
0.55	0.02	1
0.56	0.02	1
0.57	0.02	1
0.58	0.02	1
0.6	0.02	1
0.61	0.02	1
0.62	0.02	1
0.63	0.02	1
0.65	0.02	1
0.66	0.02	1
0.67	0.02	1
0.69	0.02	1
0.7	0.02	1
0.71	0.02	1
0	0	3
0	0	3
0	0.01	3
0	0.02	3
0.01	0.03	3
0.02	0.03	3
0.03	0.04	3
0.04	0.05	3
0.06	0.05	3
0.07	0.06	3
0.09	0.07	3
0.1	0.07	3
0.11	0.08	3
0.12	0.09	3
0.13	0.09	3
0.14	0.1	3
0.15	0.11	3
0.16	0.1	3
0.18	0.09	3
0.19	0.08	3
0.2	0.08	3
0.21	0.08	3
0.22	0.07	3
0.24	0.07	3
0.25	0.07	3
0.26	0.07	3
0.28	0.06	3
0.29	0.06	3
0.3	0.06	3
0.32	0.07	3
0.33	0.07	3
0.34	0.09	3
0.35	0.11	3
0.36	0.1	3
0.37	0.08	3
0.39	0.08	3
0.4	0.08	3
0.41	0.08	3
0.42	0.06	3
0.43	0.06	3
0.45	0.06	3
0.46	0.06	3
0.47	0.06	3
0.49	0.07	3
0.5	0.07	3
0.51	0.07	3
0.52	0.07	3
0.54	0.07	3
0.55	0.07	3
0.56	0.07	3
0.58	0.07	3
0.59	0.07	3
0.6	0.07	3
0.61	0.07	3
0.62	0.06	3
0.63	0.06	3
0.65	0.06	3
0.66	0.06	3
0.67	0.06	3
0.69	0.06	3
0.7	0.07	3
0.71	0.07	3
0.72	0.07	3
0.73	0.06	3
0.75	0.01	3
0.76	0.01	3
0.77	0.01	3
0.78	0.01	3
0.8	0.01	3
0.81	0.01	3
0.82	0.01	3
0.83	0.01	3
0.85	0.01	3
0.86	0.01	3
0.87	0.01	3
0.88	0.01	3
0.9	0.01	3
0.91	0.01	3
0.92	0.01	3
0.94	0.01	3
0.94	0.01	3
0.94	0.01	3
0.94	0.01	3
0.94	0.01	3
0.94	0.01	3
0.94	0.01	3
0.94	0.01	3
0	0	5
0	0	5
0	0	5
0	0	5
0.01	0.01	5
0.02	0.01	5
0.03	0.01	5
0.04	0.01	5
0.05	0.01	5
0.06	0.02	5
0.07	0.02	5
0.09	0.09	5
0.1	0.02	5
0.11	0.02	5
0.13	0.02	5
0.14	0.02	5
0.15	0.01	5
0.16	0.02	5
0.18	0.03	5
0.19	0.03	5
0.2	0.03	5
0.21	0.03	5
0.22	0.03	5
0.23	0.03	5
0.24	0.04	5
0.26	0.04	5
0.27	0.04	5
0.28	0.04	5
0.29	0.04	5
0.31	0.04	5
0.32	0.04	5
0.33	0.05	5
0.35	0.05	5
0.36	0.05	5
0.37	0.06	5
0.38	0.06	5
0.4	0.07	5
0.41	0.07	5
0.42	0.07	5
0.43	0.06	5
0.44	0.08	5
0.46	0.08	5
0.47	0.09	5
0.48	0.1	5
0.49	0.1	5
0.5	0.11	5
0.52	0.12	5
0.53	0.13	5
0.54	0.14	5
0.56	0.15	5
0.57	0.16	5
0.58	0.18	5
0.59	0.2	5
0.6	0.21	5
0.62	0.24	5
0.63	0.27	5
0.64	0.28	5
0.65	0.02	5
0.66	0.02	5
0.68	0.01	5
0.69	0.01	5
0.7	0.01	5
0.71	0.01	5
0.73	0.02	5
0.74	0.02	5
0.75	0.01	5
0.76	0.01	5
0.78	0.02	5
0.79	0.02	5
0.8	0.12	5
0.81	0.02	5
0.83	0.02	5
0.84	0.02	5
0.84	0.02	5
0.84	0.02	5
0.84	0.02	5
0.84	0.02	5
0	0	6
0	0	6
0	0	6
0	0	6
0	0.01	6
0.01	0.01	6
0.01	0.01	6
0.02	0.02	6
0.04	0.03	6
0.05	0.03	6
0.06	0.03	6
0.07	0.03	6
0.08	0.04	6
0.1	0.04	6
0.11	0.05	6
0.12	0.05	6
0.13	0.06	6
0.15	0.06	6
0.16	0.07	6
0.17	0.08	6
0.18	0.09	6
0.19	0.1	6
0.21	0.12	6
0.22	0.15	6
0.23	0.16	6
0.24	0.18	6
0.25	0.21	6
0.26	0.26	6
0.27	0.33	6
0.29	0.42	6
0.3	0.55	6
0.31	0.76	6
0.32	0.46	6
0.33	0.26	6
0.34	0.14	6
0.36	0.1	6
0.37	0.06	6
0.38	0.03	6
0.39	0.02	6
Species		Date		Sample information
P. americana		2012-05-04		Trial #	CSA (m2)	Grip Sep (mm)	Test Speed (mm/min)	Segment #	Individual #
Tensile Testing Raw Data				1	1.8e-07	1.9	1.5	T3	1
				2	2.346e-07	2.04	1.5	T2	1
				3	2.31e-07	2.48	1.5	T3	2
				4	1.199e-07	1.58	1.5	T2	2
				5	2.32e-07	1.85	1.5	T3	3
Disp (mm)	Force (N)	Trial		6	1.896e-07	1.5	1.5	T2	3
0	-0.01	1		7	1.68e-07	1.5	1.5	T3	4
0	-0.01	1		8	2.265e-07	1.52	1.5	T2	4
0	-0.01	1		9	1.58e-07	1.99	1.5	T3	5
0	-0.01	1		10	2.214e-07	1.53	1.5	T2	5
0	-0.01	1
0	0.29	1
0.01	0.43	1
0.03	0.61	1
0.04	0.9	1
0.05	1.13	1
0.06	1.22	1
0.07	1.24	1
0.08	1.26	1
0.1	1.3	1
0.11	1.29	1
0.12	1.24	1
0.13	1.18	1
0.15	1.09	1
0.16	1.04	1
0.17	1.01	1
0.18	0.95	1
0.19	0.87	1
0.2	0.85	1
0.22	0.74	1
0.23	0.76	1
0.24	0.77	1
0.25	0.78	1
0.26	0.78	1
0.28	0.78	1
0.29	0.75	1
0.3	0.72	1
0.32	0.68	1
0.33	0.67	1
0.34	0.67	1
0.35	0.66	1
0.37	0.65	1
0.38	0.63	1
0.39	0.62	1
0.4	0.61	1
0.41	0.58	1
0.42	0.57	1
0.44	0.56	1
0.45	0.54	1
0.46	0.53	1
0.48	0.51	1
0.49	0.51	1
0.5	0.5	1
0.51	0.5	1
0.53	0.5	1
0.54	0.5	1
0.55	0.49	1
0.56	0.49	1
0.58	0.48	1
0.59	0.47	1
0.6	0.47	1
0.61	0.46	1
0.63	0.45	1
0.64	0.44	1
0.65	0.44	1
0.66	0.44	1
0.67	0.43	1
0.69	0.43	1
0.7	0.43	1
0.72	0.42	1
0.73	0.42	1
0.74	0.42	1
0.75	0.42	1
0.77	0.42	1
0.78	0.42	1
0.79	0.42	1
0.8	0.42	1
0.81	0.37	1
0.81	0.35	1
0.81	0.33	1
0.81	0.32	1
0.81	0.32	1
0	-0.01	2
0	0	2
0	0	2
0	0.01	2
0.01	0.02	2
0.02	0.03	2
0.03	0.03	2
0.04	0.04	2
0.06	0.05	2
0.07	0.06	2
0.08	0.08	2
0.1	0.1	2
0.11	0.11	2
0.12	0.13	2
0.13	0.16	2
0.14	0.19	2
0.16	0.25	2
0.17	0.32	2
0.18	0.37	2
0.19	0.35	2
0.2	0.33	2
0.21	0.31	2
0.23	0.28	2
0.24	0.23	2
0.25	0.21	2
0.26	0.19	2
0.28	0.17	2
0.29	0.17	2
0.3	0.16	2
0.32	0.16	2
0.33	0.15	2
0.34	0.15	2
0.35	0.14	2
0.37	0.13	2
0.38	-0.01	2
0.39	-0.03	2
0.4	-0.03	2
0.41	-0.03	2
0.43	-0.04	2
0.44	-0.04	2
0.45	-0.03	2
0.46	-0.04	2
0	0	3
0	0	3
0	0	3
0	0	3
0	0	3
0	0	3
0	0.05	3
0.01	0.06	3
0.03	0.06	3
0.04	0.07	3
0.05	0.07	3
0.06	0.08	3
0.07	0.09	3
0.09	0.09	3
0.1	0.1	3
0.11	0.11	3
0.12	0.12	3
0.14	0.14	3
0.15	0.15	3
0.16	0.16	3
0.18	0.17	3
0.19	0.19	3
0.2	0.2	3
0.21	0.23	3
0.22	0.26	3
0.24	0.29	3
0.25	0.35	3
0.26	0.41	3
0.27	0.5	3
0.28	0.63	3
0.3	0.73	3
0.31	0.83	3
0.32	0.9	3
0.33	0.97	3
0.35	1.03	3
0.36	1.05	3
0.37	1.02	3
0.38	0.99	3
0.4	0.92	3
0.41	0.95	3
0.42	0.98	3
0.43	0.99	3
0.45	0.93	3
0.46	0.75	3
0.47	0.55	3
0.48	0.48	3
0.49	0.44	3
0.5	0.4	3
0.52	0.36	3
0.53	0.32	3
0.54	0.28	3
0.55	0.26	3
0.56	0.23	3
0.58	0.22	3
0.59	0.21	3
0.6	0.2	3
0.62	0.2	3
0.63	0.2	3
0.64	0.19	3
0.65	0.17	3
0.66	0.18	3
0.67	0.17	3
0	0	4
0	0	4
0	0	4
0	0.1	4
0	0.17	4
0	0.05	4
0.01	0.13	4
0.01	0.16	4
0.03	0.21	4
0.04	0.2	4
0.06	0.23	4
0.07	0.27	4
0.08	0.34	4
0.09	0.49	4
0.1	0.71	4
0.12	0.58	4
0.12	0.66	4
0.13	0.63	4
0.14	0.56	4
0.16	0.47	4
0.17	0.38	4
0.18	0.37	4
0.19	0.31	4
0.21	0.27	4
0.22	0.19	4
0.23	0.23	4
0.24	0.24	4
0.25	0.24	4
0.27	0.24	4
0.28	0.31	4
0.29	0.24	4
0.31	0.22	4
0.32	0.23	4
0.33	0.22	4
0.34	0.23	4
0.36	0.24	4
0.37	0.23	4
0.38	0.23	4
0.39	0.32	4
0.41	0.22	4
0	0.01	5
0	0.01	5
0	0.01	5
0	0.01	5
0	0.01	5
0	0.11	5
0.01	0.16	5
0.02	0.21	5
0.03	0.28	5
0.05	0.36	5
0.06	0.47	5
0.07	0.65	5
0.08	0.81	5
0.1	0.99	5
0.11	1.18	5
0.12	1.26	5
0.13	1.25	5
0.15	1.31	5
0.16	1.37	5
0.17	1.42	5
0.18	1	5
0.19	0.7	5
0.21	0.57	5
0.22	0.36	5
0.23	0.3	5
0.24	0.13	5
0.26	0.12	5
0.27	0.11	5
0.28	0.11	5
0.29	0.1	5
0.31	0.1	5
0.32	0.1	5
0.33	0.1	5
0.34	0.16	5
0.36	0.18	5
0.37	0.11	5
0.38	0.11	5
0.39	0.07	5
0.41	0.05	5
0.42	0.05	5
0.43	0.05	5
0.44	0.05	5
0.45	0.05	5
0.46	0.13	5
0.48	0.05	5
0	0	6
0	0	6
0	0	6
0	0.06	6
0	0.08	6
0	0.12	6
0.01	0.15	6
0.02	0.2	6
0.03	0.3	6
0.04	0.44	6
0.05	0.59	6
0.06	0.72	6
0.08	0.74	6
0.09	0.69	6
0.1	0.58	6
0.11	0.5	6
0.12	0.41	6
0.13	0.33	6
0.14	0.29	6
0.15	0.26	6
0.16	0.23	6
0.18	0.19	6
0.19	0.2	6
0.2	0.19	6
0.21	0.17	6
0.22	0.16	6
0.24	0.16	6
0.25	0.15	6
0.26	0.15	6
0.27	0.14	6
0.28	0.14	6
0.3	0.14	6
0.31	0.19	6
0.32	0.13	6
0.33	0.14	6
0.34	0.14	6
0.36	0.14	6
0.36	0.14	6
0.36	0.13	6
0	0.466806	7
0.04	0.466806	7
0.05	0.466806	7
0.06	0.466817	7
0.07	0.466817	7
0.09	0.466817	7
0.1	0.466817	7
0.11	0.466829	7
0.12	0.466829	7
0.13	0.466829	7
0.15	0.46684	7
0	0.470729	8
0	0.470729	8
0	0.470729	8
0	0.470741	8
0	0.470741	8
0.01	0.470752	8
0.02	0.470764	8
0.03	0.470764	8
0.04	0.470775	8
0.06	0.470775	8
0.07	0.470787	8
0.08	0.470787	8
0.09	0.470799	8
0.1	0.470799	8
0.11	0.470799	8
0.12	0.47081	8
0.13	0.470822	8
0.14	0.470822	8
0.15	0.470833	8
0.17	0.470833	8
0.18	0.470833	8
0.19	0.470845	8
0.2	0.470856	8
0.21	0.470856	8
0.23	0.470868	8
0.24	0.470868	8
0.25	0.470868	8
0.26	0.47088	8
0.28	0.470891	8
0.29	0.470891	8
0.3	0.470903	8
0.31	0.470903	8
0.32	0.470903	8
0.34	0.470914	8
0.35	0.470926	8
0.36	0.470926	8
0.37	0.470938	8
0.38	0.470938	8
0.39	0.470949	8
0.41	0.470949	8
0.42	0.470961	8
0.43	0.470961	8
0.45	0.470972	8
0.46	0.470972	8
0.47	0.470972	8
0.48	0.470984	8
0.49	0.470995	8
0.51	0.470995	8
0.52	0.471007	8
0.53	0.471007	8
0.54	0.471007	8
0.56	0.471019	8
0.57	0.47103	8
0.57	0.47103	8
0.57	0.471042	8
0.57	0.471042	8
0	0.478484	9
0	0.478484	9
0	0.478495	9
0	0.478495	9
0.02	0.478507	9
0.03	0.478507	9
0.04	0.478519	9
0.05	0.478519	9
0.06	0.47853	9
0.07	0.47853	9
0.08	0.478542	9
0.09	0.478542	9
0.11	0.478553	9
0.12	0.478553	9
0.13	0.478565	9
0.14	0.478565	9
0.16	0.478576	9
0.17	0.478576	9
0.18	0.478588	9
0.19	0.478588	9
0.2	0.4786	9
0.21	0.4786	9
0.22	0.478611	9
0.23	0.478611	9
0.25	0.478623	9
0.26	0.478623	9
0.27	0.478634	9
0.28	0.478634	9
0.3	0.478646	9
0.31	0.478646	9
0.32	0.478657	9
0.33	0.478657	9
0.34	0.478669	9
0	0.481794	10
0	0.481794	10
0	0.481806	10
0	0.481806	10
0.03	0.481817	10
0.04	0.481817	10
0.05	0.481829	10
0.06	0.481829	10
0.07	0.48184	10
0.08	0.48184	10
0.09	0.481852	10
0.1	0.481852	10
0.11	0.481863	10
0.13	0.481863	10
0.14	0.481875	10
0.15	0.481875	10
0.17	0.481887	10
0.18	0.481887	10
0.19	0.481898	10
0.2	0.481898	10
0.22	0.48191	10
0.23	0.48191	10
0.24	0.481921	10
0.25	0.481921	10
0.26	0.481933	10
0.28	0.481933	10
0.29	0.481944	10
0.3	0.481944	10
0.31	0.481956	10
Species		Date		Sample information
P. americana		2012-05-10		Trial #	CSA (m2)	Grip Sep (mm)	Test Speed (mm/min)	Segment #	Individual #
Tensile Testing Raw Data				1	3.64e-07	1.72	1.5	T3	1
				2	1.56e-07	2.05	1.5	T2	1
				3	1.944e-07	1.54	1.5	T3	2
Disp (mm)	Force (N)	Trial		4	9.63e-08	2.09	1.5	T2	2
0	0	1		5	1.539e-07	1.74	1.5	T3	3
0	0	1		6	1.74e-07	1.58	1.5	T2	3
0	0	1		7	3.268e-07	1.9	1.5	T3	4
0	0.08	1		8	1.914e-07	1.86	1.5	T3	5
0.04	0.26	1		9	2.265e-07	1.84	1.5	T2	5
0.04	0.49	1		10	3.44e-07	2.05	1.5	T3	6
0.05	0.79	1
0.06	0.81	1
0.07	0.78	1
0.08	0.74	1
0.1	0.19	1
0.1	0.17	1
0.12	0.14	1
0.13	0.12	1
0.14	0.06	1
0.15	0.09	1
0.16	0.06	1
0.17	0.06	1
0.19	0.06	1
0.2	0.05	1
0.21	0.04	1
0.22	0.05	1
0.24	0.03	1
0.25	0.02	1
0.26	0.04	1
0.28	0.04	1
0.29	0.04	1
0.3	0.03	1
0.31	0.04	1
0.32	-0.04	1
0.33	0.06	1
0.35	0.03	1
0.36	0.03	1
0.37	0.03	1
0.38	0.03	1
0.4	0.04	1
0.41	0.03	1
0.42	0.03	1
0.43	0.09	1
0.45	0.03	1
0.45	0.03	1
0.45	0.02	1
0	0	2
0	0	2
0	0.08	2
0.01	0.01	2
0.02	-0.05	2
0.04	0.09	2
0.05	-0.04	2
0.05	0.05	2
0.06	0.06	2
0.07	0.01	2
0.09	0.09	2
0.1	0.11	2
0.11	0.15	2
0.12	0.13	2
0.13	0.24	2
0.14	0.34	2
0.16	0.56	2
0.17	0.88	2
0.18	0.91	2
0.2	0.88	2
0.21	0.74	2
0.22	0.64	2
0.23	0.59	2
0.24	0.55	2
0.26	0.47	2
0.27	0.44	2
0.28	0.4	2
0.29	0.38	2
0.3	0.35	2
0.31	0.34	2
0.33	0.33	2
0.34	0.31	2
0	0	3
0	0	3
0	0	3
0	0.01	3
0.02	0.02	3
0.03	0.04	3
0.04	0.03	3
0.06	0.04	3
0.07	0.04	3
0.07	0.05	3
0.09	0.05	3
0.1	0.08	3
0.11	0.07	3
0.12	0.08	3
0.13	0.04	3
0.15	0.04	3
0.16	0.12	3
0.17	0.13	3
0.18	0.18	3
0.2	0.17	3
0.21	0.2	3
0.22	0.23	3
0.24	0.28	3
0.25	0.33	3
0.26	0.4	3
0.27	0.46	3
0.29	0.62	3
0.3	0.67	3
0.31	0.8	3
0.33	0.54	3
0.34	0.5	3
0.35	0.42	3
0.36	0.36	3
0.38	0.34	3
0.39	0.33	3
0.4	0.32	3
0.41	0.32	3
0.42	0.28	3
0.42	0.27	3
0	0	4
0	0	4
0	0.02	4
0.01	0.05	4
0.01	0.05	4
0.02	0.08	4
0.03	0.06	4
0.04	0.02	4
0.06	0.07	4
0.07	0.1	4
0.08	0.13	4
0.1	0.17	4
0.11	0.26	4
0.12	0.41	4
0.13	0.7	4
0.15	0.52	4
0.16	0.45	4
0.17	0.38	4
0.18	0.34	4
0.19	0.29	4
0.21	0.25	4
0.22	0.19	4
0.23	0.14	4
0.24	0.11	4
0.26	0.11	4
0.27	0.05	4
0	0	5
0	0	5
0	0	5
0	0	5
0.02	0.01	5
0.03	0	5
0.04	0.01	5
0.05	0.01	5
0.06	0.01	5
0.07	0.01	5
0.08	0.02	5
0.09	0.02	5
0.1	0.02	5
0.11	0.03	5
0.13	0.02	5
0.14	0.03	5
0.15	0.05	5
0.16	0.05	5
0.18	0.06	5
0.19	0.07	5
0.2	0.09	5
0.22	0.1	5
0.23	0.13	5
0.24	0.16	5
0.25	0.21	5
0.27	0.24	5
0.28	0.25	5
0.29	0.16	5
0.3	0.12	5
0.31	0.02	5
0.33	0.01	5
0.34	0.01	5
0.35	0.01	5
0.36	0.02	5
0.37	0.01	5
0.39	0.01	5
0.4	0.01	5
0.41	0.01	5
0	0	6
0	0.01	6
0	0.01	6
0	0.01	6
0	0.02	6
0	0.1	6
0	0.04	6
0.01	0.06	6
0.02	0.08	6
0.03	0.09	6
0.05	0.11	6
0.06	0.14	6
0.07	0.19	6
0.09	0.24	6
0.1	0.27	6
0.11	0.21	6
0.12	0.35	6
0.13	0.57	6
0.15	0.73	6
0.16	0.57	6
0.17	0.46	6
0.19	0.34	6
0.2	0.23	6
0.21	0.2	6
0.22	0.18	6
0.23	0.16	6
0.24	0.16	6
0.26	0.14	6
0.27	0.23	6
0.29	0.04	6
0.3	0.07	6
0.31	0.11	6
0.31	0.1	6
0.31	0.1	6
0	0	7
0	0	7
0	0	7
0	0	7
0.03	0.01	7
0.03	0.02	7
0.04	0.03	7
0.05	0.04	7
0.06	0.05	7
0.07	0.06	7
0.08	0.08	7
0.1	0.1	7
0.11	0.19	7
0.12	0.14	7
0.13	0.18	7
0.15	0.23	7
0.16	0.31	7
0.17	0.41	7
0.18	0.4	7
0.19	0.29	7
0.21	0.28	7
0.22	0.26	7
0.23	0.24	7
0.24	0.22	7
0.25	0.18	7
0.26	0.18	7
0.27	0.16	7
0	0	8
0	0	8
0	0	8
0	-0.03	8
0.02	0.1	8
0.03	0.06	8
0.04	0.14	8
0.04	0.1	8
0.05	0.13	8
0.06	0.21	8
0.07	0.3	8
0.09	0.49	8
0.1	0.84	8
0.11	0.54	8
0.12	0.51	8
0.14	0.51	8
0.15	0.47	8
0.16	0.46	8
0.17	0.45	8
0.18	0.45	8
0.19	0.44	8
0.2	0.42	8
0.21	0.37	8
0.21	0.35	8
0.21	0.34	8
0.21	0.33	8
0.21	0.33	8
0.21	0.32	8
0	0	9
0	0	9
0	0	9
0	-0.04	9
0.02	0.02	9
0.03	0.03	9
0.04	-0.03	9
0.06	0.08	9
0.07	-0.03	9
0.08	0.08	9
0.09	0.11	9
0.09	0.13	9
0.1	0.3	9
0.12	0.27	9
0.13	0.36	9
0.14	0.49	9
0.15	0.48	9
0.16	0.43	9
0.18	0.46	9
0.19	0.4	9
0.2	0.36	9
0.21	0.25	9
0.22	0.21	9
0.23	0.19	9
0.25	0.17	9
0.26	0.16	9
0.27	0.15	9
0.29	0.25	9
0.3	0.12	9
0.31	0.04	9
0.32	0.04	9
0.33	0.04	9
0.35	0.05	9
0.35	0.02	9
0.37	0.02	9
0.37	0.02	9
0.37	0.02	9
0	0	10
0	0	10
0	0	10
0	0.02	10
0.02	0.04	10
0.03	0.05	10
0.04	0.05	10
0.05	0.11	10
0.06	0.07	10
0.06	0.08	10
0.07	0.04	10
0.08	0.11	10
0.09	0.13	10
0.1	0.15	10
0.12	0.16	10
0.13	0.21	10
0.14	0.24	10
0.15	0.32	10
0.16	0.36	10
0.18	0.42	10
0.19	0.53	10
0.2	0.71	10
0.21	0.92	10
0.22	1.13	10
0.23	0.49	10
0.25	0.51	10
0.26	0.44	10
0.27	0.4	10
0.28	0.36	10
0.29	0.31	10
Species		Date		Sample information
P. americana				Trial #	CSA (m2)	Grip Sep (mm)	Test Speed (mm/min)	Segment #	Individual #
Tensile Testing Raw Data	2012-05-18			1	5.6e-08	2.85	1.5	2	1
				2	2.121e-07	4.75	1.5	3	1
				3	1.476e-07	3.87	1.5	4	1
Disp (mm)	Force (N)	Trial		4	1.375e-07	5	1.5	5	1
0	0	1		5	7.74e-08	3.65	1.5	6	1
0	0	1		6	3.488e-07	4.96	1.5	T2	1
0	0	1		7	1.024e-07	3.06	1.5	2	2
0	0.01	1		8	1.88e-07	3.28	1.5	3	2
0	0.01	1		9	2.508e-07	2.77	1.5	4	2
0.05	0.04	1		10	1.065e-07	3.86	1.5	5	2
0.05	0.02	1		11	1.48e-07	3.73	1.5	6	2
0.06	0.02	1		12	4.27e-07	3.3	1.5	T3	2
0.06	0.02	1
0.08	0.04	1
0.08	0.04	1
0.1	0.05	1
0.11	0	1
0.12	0.09	1
0.14	0.17	1
0.14	0.1	1
0.16	0.1	1
0.18	0.06	1
0.18	0.12	1
0.19	0.2	1
0.21	0.26	1
0.21	0.33	1
0.23	0.46	1
0.24	0.65	1
0.25	0.83	1
0.27	0.64	1
0.28	0.38	1
0.29	0.34	1
0.31	0.21	1
0.32	0.18	1
0.33	0.16	1
0.34	0.13	1
0.35	0.12	1
0.37	0.11	1
0.38	0.11	1
0.39	0.09	1
0.4	0.06	1
0.42	0.08	1
0.43	0.08	1
0.44	0.08	1
0.45	0.08	1
0.47	0.16	1
0.47	0.07	1
0.47	0.07	1
0.47	0.07	1
0.47	0.07	1
0	0	2
0	0	2
0	0	2
0	0	2
0.01	0	2
0.03	0.04	2
0.04	0.01	2
0.05	0.01	2
0.07	0	2
0.08	-0.06	2
0.09	-0.06	2
0.09	0.01	2
0.11	0.01	2
0.11	0.01	2
0.12	0.01	2
0.13	0.01	2
0.15	0.01	2
0.16	0.01	2
0.17	0.02	2
0.18	0.02	2
0.2	0.02	2
0.2	0.01	2
0.22	0.02	2
0.23	0.02	2
0.24	0.03	2
0.25	0.03	2
0.27	0.04	2
0.28	0.05	2
0.29	0.06	2
0.3	0.06	2
0.32	0.08	2
0.33	0.09	2
0.34	0.11	2
0.36	0.13	2
0.37	0.14	2
0.38	0.13	2
0.39	0.16	2
0.4	0.19	2
0.42	0.19	2
0.43	0.18	2
0.44	0.18	2
0.46	0.19	2
0.47	0	2
0.48	0.01	2
0.5	0	2
0.51	0	2
0.52	0	2
0	0	3
0	0	3
0	0	3
0	0	3
0.01	0.01	3
0.03	-0.04	3
0.04	-0.07	3
0.05	-0.05	3
0.06	0.04	3
0.07	0	3
0.07	0.08	3
0.09	-0.03	3
0.1	0	3
0.11	0.03	3
0.12	0.03	3
0.14	0.03	3
0.15	0.04	3
0.16	0.05	3
0.17	0.05	3
0.18	0.06	3
0.2	0.07	3
0.21	0.09	3
0.22	0.15	3
0.23	0.13	3
0.25	0.2	3
0.26	0.28	3
0.27	0.42	3
0.28	0.68	3
0.29	0.92	3
0.3	1.14	3
0.32	0.8	3
0.33	0.49	3
0.34	0.35	3
0.35	0.3	3
0.37	0.29	3
0.38	0.27	3
0.39	0.27	3
0.4	0.27	3
0.42	0.26	3
0.43	0.26	3
0.44	0.26	3
0.45	0.26	3
0.47	0.26	3
0.48	0.26	3
0.49	0.27	3
0.5	0.27	3
0.52	0.27	3
0.52	0.27	3
0.54	0.27	3
0	0	4
0	0	4
0	0.01	4
0	0.01	4
0.01	0.01	4
0.03	0.01	4
0.04	0.1	4
0.05	-0.03	4
0.07	0.02	4
0.08	0.02	4
0.09	0.03	4
0.1	0.02	4
0.1	0.04	4
0.12	0.05	4
0.12	0.06	4
0.13	0.07	4
0.15	0.09	4
0.16	0.12	4
0.17	0.15	4
0.18	0.19	4
0.2	0.26	4
0.21	0.33	4
0.22	0.42	4
0.23	0.54	4
0.24	0.59	4
0.26	0.61	4
0.27	0.29	4
0.28	0.17	4
0.29	0.14	4
0.31	0.12	4
0.32	0.11	4
0.33	0.11	4
0	0	5
0	0	5
0	0	5
0	0	5
0.01	0	5
0.02	0	5
0.03	0	5
0.05	0	5
0.05	0	5
0.06	0	5
0.08	0	5
0.09	0.01	5
0.1	0.01	5
0.11	0.01	5
0.12	-0.03	5
0.14	0.01	5
0.15	0.01	5
0.16	-0.04	5
0.17	0.01	5
0.18	0.02	5
0.2	0.01	5
0.21	0.02	5
0.22	0.02	5
0.23	0.02	5
0.24	0.02	5
0.26	0.02	5
0.27	0.02	5
0.28	0.02	5
0.29	0.03	5
0.3	0.02	5
0.31	0.02	5
0.33	0.03	5
0.34	0.03	5
0.35	0.03	5
0.37	-0.02	5
0.38	0.03	5
0.39	0.04	5
0.4	0.02	5
0.41	0.04	5
0.43	0.04	5
0.44	0.05	5
0.45	0.1	5
0.46	0.05	5
0.47	0.05	5
0.48	0.05	5
0.5	0.06	5
0.51	0.06	5
0.52	0.07	5
0.53	0.07	5
0.55	0.08	5
0.56	0.09	5
0.57	0.09	5
0.58	0.1	5
0.6	0.11	5
0.61	0.08	5
0.62	0.14	5
0.63	0.17	5
0.65	0.2	5
0.66	0.24	5
0.66	0.3	5
0.68	0.39	5
0.69	0.46	5
0.71	0.57	5
0.72	0.76	5
0.73	0.79	5
0.74	0.05	5
0.76	0	5
0.77	0.11	5
0.78	0.1	5
0.8	0.03	5
0.81	0.03	5
0.82	-0.06	5
0.83	0.02	5
0.84	0.02	5
0.86	0.03	5
0	0	6
0	0	6
0	0.05	6
0.02	0.11	6
0.02	0.14	6
0.02	0.19	6
0.04	0.21	6
0.04	0.23	6
0.06	0.28	6
0.07	0.41	6
0.08	0.32	6
0.1	0.45	6
0.1	0.47	6
0.12	0.64	6
0.13	0.82	6
0.15	1.06	6
0.16	1.41	6
0.17	1.76	6
[truncated: 509 more rows]

## Sheet: Hissing-Puncture
Species		Date	Trial #	Segement #	Individual #
G. portentosa		2013-03-04	1	T2	1
Puncture Testing Raw Data			2	T3	1
			3	A2	1
Disp (mm)	Force (N)	Trial #	4	A3	1
0	0	1	5	A4	1
0	0	1	6	A5	1
0	0	1	7	A6	1
0	0	1	8	T2	2
0	0	1	9	T3	2
0	0	1	10	A2	2
0	0	1	11	A3	2
0	0	1	12	A4	2
0	0	1	13	A5	2
0	0	1	14	A6	2
0	0	1	15	T2	3
0	0.08	1	16	T3	3
0	0.42	1	17	A2	3
0.01	0.98	1	18	A3	3
0.02	1.38	1	19	A4	3
0.02	1.79	1	20	A5	3
0.03	2.29	1	21	A6	3
0.04	2.64	1	22	T2	4
0.05	2.99	1	23	T3	4
0.06	3.37	1	24	A2	4
0.07	3.74	1	25	A3	4
0.07	4.19	1	26	A4	4
0.08	4.8	1	27	A5	4
0.1	5.4	1	28	A6	4
0.11	6.03	1
0.12	6.82	1
0.13	7.46	1
0.14	8.09	1
0.15	8.98	1
0.16	9.71	1
0.17	10.57	1
0.18	11.67	1
0.19	12.62	1
0.2	13.6	1
0.21	14.77	1
0.22	14.69	1
0.23	15.63	1
0.24	16.84	1
0.25	17.91	1
0.26	19.04	1
0.27	20.37	1
0.28	21.55	1
0.29	22.6	1
0.3	23.88	1
0.31	25.01	1
0.32	26.1	1
0.33	27.41	1
0.34	28.48	1
0.35	29.59	1
0.36	30.97	1
0.37	32.04	1
0.38	33.14	1
0.39	34.3	1
0.4	35.31	1
0.4	36.28	1
0.42	37.34	1
0.42	38.26	1
0.43	38.92	1
0.44	39.9	1
0.45	40.5	1
0.46	41.16	1
0.47	41.77	1
0.48	42.08	1
0.49	41.64	1
0.51	40.76	1
0.52	39.38	1
0.54	36.18	1
0.57	29.13	1
0.61	18.6	1
0.63	15.07	1
0.65	12.16	1
0.66	10.64	1
0.68	9.8	1
0.69	9.04	1
0.7	8.43	1
0.72	7.81	1
0.73	7.29	1
0.74	6.87	1
0.76	5.86	1
0.77	4.92	1
0.77	4.66	1
0.77	4.53	1
0.77	4.43	1
0	0	2
0	0	2
0	0	2
0	0	2
0	0	2
0	0	2
0	0	2
0	0	2
0	0	2
0	0	2
0	0	2
0	0	2
0	0	2
0	0	2
0.01	0	2
0.01	0	2
0.01	0	2
0.02	0	2
0.03	0	2
0.04	0	2
0.05	0.07	2
0.06	0.32	2
0.07	0.54	2
0.08	0.98	2
0.085	1.44	2
0.09	1.67	2
0.1	2.23	2
0.1	2.79	2
0.12	3.52	2
0.13	4.15	2
0.14	4.79	2
0.15	5.58	2
0.16	6.48	2
0.17	7.32	2
0.18	8.3	2
0.19	9.13	2
0.2	10.06	2
0.22	11.18	2
0.23	12.11	2
0.24	13.08	2
0.25	14.2	2
0.26	15.17	2
0.26	16.22	2
0.28	17.4	2
0.29	18.46	2
0.3	19.54	2
0.31	20.81	2
0.31	21.92	2
0.33	23.03	2
0.34	24.36	2
0.35	25.45	2
0.36	26.48	2
0.37	27.66	2
0.38	28.7	2
0.39	29.69	2
0.4	30.88	2
0.41	31.68	2
0.42	32.27	2
0.43	32.93	2
0.44	33.24	2
0.45	33.27	2
0.47	29.46	2
0.49	27.69	2
0.5	26.99	2
0.52	26.09	2
0.53	25.03	2
0.55	23.2	2
0.56	21.3	2
0.58	18.91	2
0.59	15.64	2
0.61	13.7	2
0.63	12.85	2
0.64	12.36	2
0.65	11.85	2
0.66	11.36	2
0.67	10.94	2
0.69	10.36	2
0.7	9.88	2
0.71	9.35	2
0.73	8.79	2
0.74	8.44	2
0.75	8.05	2
0.77	7.16	2
0.77	5.27	2
0.78	4.74	2
0	0	3
0	0	3
0	0	3
0	0	3
0	0	3
0	0	3
0	0	3
0	0	3
0	0	3
0	0	3
0	0	3
0	0	3
0.01	0	3
0.01	0	3
0.01	0	3
0.01	0	3
0.02	0	3
0.03	0	3
0.04	0	3
0.05	0	3
0.06	0	3
0.07	0	3
0.09	0	3
0.1	0	3
0.11	0.08	3
0.12	0.21	3
0.13	0.31	3
0.13	0.49	3
0.15	0.76	3
0.16	1	3
0.17	1.25	3
0.18	1.57	3
0.19	1.85	3
0.2	2.15	3
0.21	2.58	3
0.22	2.99	3
0.23	3.41	3
0.24	3.93	3
0.25	4.38	3
0.26	4.84	3
0.28	5.36	3
0.29	5.82	3
0.3	6.3	3
0.31	6.88	3
0.32	7.34	3
0.33	7.83	3
0.35	8.41	3
0.36	8.91	3
0.37	9.42	3
0.38	10.03	3
0.39	10.58	3
0.4	11.08	3
0.41	11.69	3
0.42	12.22	3
0.43	12.74	3
0.45	13.37	3
0.46	13.79	3
0.47	14.23	3
0.48	14.73	3
0.49	15.17	3
0.5	15.56	3
0.52	16.08	3
0.52	16.51	3
0.53	16.97	3
0.55	17.5	3
0.56	17.92	3
0.57	18.36	3
0.58	18.87	3
0.59	19.29	3
0.6	19.74	3
0.61	20.26	3
0.62	20.72	3
0.63	21.2	3
0.64	21.65	3
0.65	22.07	3
0.66	22.47	3
0.68	22.87	3
0.69	23.21	3
0.7	23.55	3
0.71	23.92	3
0.72	24.29	3
0.73	24.63	3
0.74	25.01	3
0.75	25.31	3
0.76	25.72	3
0.78	25.94	3
0.79	26.21	3
0.8	26.51	3
0.81	26.59	3
0.82	26.32	3
0.83	26.26	3
0.85	26.36	3
0.86	26.49	3
0.87	26.49	3
0.88	26.36	3
0.89	25.92	3
0.91	25.37	3
0.93	24.21	3
0.94	22.35	3
0.96	20.52	3
0.98	18.42	3
1	17.01	3
1.01	15.78	3
1.03	14.73	3
1.04	14.06	3
1.05	13.37	3
1.07	12.65	3
1.07	11.6	3
0	0	4
0	0	4
0	0	4
0	0	4
0	0	4
0	0	4
0	0	4
0.01	0	4
0.01	0	4
0.01	0	4
0.02	0	4
0.03	0	4
0.03	0	4
0.05	0.01	4
0.06	0.1	4
0.06	0.21	4
0.07	0.38	4
0.08	0.56	4
0.09	0.74	4
0.1	1.02	4
0.11	1.29	4
0.12	1.61	4
0.14	2.01	4
0.15	2.38	4
0.16	2.79	4
0.17	3.34	4
0.18	3.81	4
0.19	4.32	4
0.21	4.96	4
0.22	5.52	4
0.23	6.09	4
0.24	6.8	4
0.25	7.41	4
0.26	8.04	4
0.28	8.8	4
0.29	9.47	4
0.3	10.11	4
0.31	10.89	4
0.32	11.54	4
0.33	12.2	4
0.34	12.88	4
0.35	13.31	4
0.36	13.82	4
0.37	14.47	4
0.39	15.02	4
0.4	15.55	4
0.41	16.19	4
0.42	16.76	4
0.43	17.23	4
0.44	17.85	4
0.45	18.3	4
0.46	18.79	4
0.48	19.3	4
0.49	19.74	4
0.5	20.19	4
0.51	20.78	4
0.52	21.16	4
0.52	21.63	4
0.54	22.09	4
0.55	22.47	4
0.56	22.57	4
0.57	20.78	4
0.58	20.47	4
0.6	20.17	4
0.61	19.87	4
0.62	19.45	4
0.63	19	4
0.65	18.62	4
0.66	18.23	4
0.68	17.72	4
0.69	16.68	4
0.71	15.49	4
0.72	14.41	4
0.73	13.13	4
0.75	12.26	4
0.76	11.61	4
0.78	10.83	4
0.79	10.47	4
0.8	10	4
0.82	9.46	4
0.83	8.94	4
0.84	8.53	4
0.85	7.75	4
0	0	5
0	0	5
0	0	5
0	0	5
0	0	5
0	0	5
0	0	5
0	0	5
0	0	5
0	0	5
0	0	5
0	0	5
0.01	0	5
0.02	0.01	5
0.02	0.1	5
0.03	0.21	5
0.04	0.36	5
0.05	0.54	5
0.06	0.74	5
0.06	0.99	5
0.08	1.3	5
0.08	1.58	5
0.09	1.89	5
0.1	2.27	5
0.12	2.63	5
0.13	3.03	5
0.14	3.54	5
0.15	4.02	5
0.16	4.53	5
0.17	5.16	5
0.18	5.69	5
0.19	6.24	5
0.21	6.92	5
0.22	7.51	5
0.23	8.1	5
0.24	8.82	5
0.25	9.41	5
0.26	10.01	5
0.28	10.75	5
0.29	11.39	5
0.3	12.02	5
0.31	12.75	5
0.32	13.34	5
0.33	13.92	5
0.34	14.58	5
0.35	15.14	5
0.36	15.65	5
0.37	16.23	5
0.38	16.71	5
0.4	17.13	5
0.41	17.7	5
0.42	18.18	5
0.43	18.75	5
0.44	19.26	5
0.45	19.76	5
0.46	20.13	5
0.48	20.7	5
0.49	20.96	5
0.5	21.32	5
0.51	21.82	5
0.52	22.3	5
0.53	22.84	5
0.54	23.39	5
0.55	23.81	5
0.56	24.38	5
0.57	24.83	5
0.58	25.36	5
0.59	25.7	5
0.61	26.18	5
0.61	26.5	5
0.63	26.78	5
0.64	27.05	5
0.65	27.24	5
0.66	27.48	5
0.67	27.7	5
0.68	27.93	5
0.69	28.25	5
0.71	28.44	5
0.72	28.59	5
0.73	28.74	5
0.74	28.9	5
0.75	29	5
0.76	28.83	5
0.78	27.67	5
0.8	26.04	5
0.81	23.41	5
0.84	18.62	5
0.87	14.9	5
0.88	12.26	5
0.9	10.5	5
0.92	9.18	5
0.93	7.77	5
0	0	6
0	0	6
0	0	6
0	0	6
0	0	6
0.01	0.09	6
0.02	0.18	6
0.03	0.33	6
0.04	0.73	6
0.05	1.12	6
0.05	1.55	6
0.06	2.13	6
0.07	2.59	6
0.08	3.08	6
0.09	3.68	6
0.1	4.23	6
0.11	4.81	6
0.12	5.54	6
0.13	6.17	6
0.14	6.83	6
0.16	7.68	6
0.17	8.37	6
0.18	9.17	6
0.19	9.97	6
0.2	10.61	6
0.21	11.33	6
0.22	12.19	6
0.24	12.94	6
0.25	13.7	6
0.26	14.56	6
0.27	15.31	6
0.28	16.08	6
0.29	16.74	6
0.3	17.33	6
0.31	18.05	6
0.32	18.59	6
0.33	18.94	6
0.35	18.75	6
0.36	18.65	6
0.37	18.82	6
0.38	19.15	6
0.4	19.41	6
0.41	19.65	6
0.42	19.93	6
0.43	20.2	6
0.44	20.52	6
0.45	20.93	6
0.46	21.3	6
0.48	21.56	6
0.49	21.86	6
0.5	22.05	6
0.51	22.23	6
0.52	22.42	6
0.53	22.49	6
0.54	22.51	6
0.56	22.17	6
0.57	21.65	6
0.58	21.06	6
0.6	19.77	6
0.61	18.28	6
0.63	16.65	6
0.64	15.23	6
0.66	14.15	6
0.67	12.97	6
0.69	11.62	6
0.7	10.48	6
0.71	9.73	6
0.73	9.19	6
0.74	8.81	6
0.75	8.17	6
0	0	7
0	0	7
0	0	7
0	0	7
0	0	7
0.01	0	7
0.02	0	7
0.03	0.02	7
0.04	0.15	7
0.05	0.26	7
0.06	0.39	7
0.07	0.64	7
0.08	0.89	7
0.09	1.22	7
0.1	1.64	7
0.11	1.98	7
0.12	2.29	7
0.13	2.73	7
0.14	3.12	7
0.15	3.52	7
0.16	4.04	7
0.18	4.44	7
0.19	4.92	7
0.2	5.48	7
0.21	5.94	7
0.22	6.43	7
0.23	7.03	7
0.24	7.54	7
0.26	8.08	7
0.27	8.74	7
0.28	9.31	7
0.29	9.86	7
0.31	10.53	7
0.32	11.23	7
0.33	11.79	7
0.34	12.43	7
0.35	12.98	7
0.36	13.48	7
0.37	14.06	7
0.38	14.67	7
0.39	15.19	7
0.41	15.85	7
0.41	16.39	7
0.42	16.94	7
0.44	17.59	7
0.45	18.13	7
0.46	18.6	7
0.47	19.23	7
0.48	19.67	7
0.49	20.15	7
0.51	20.71	7
0.52	21.19	7
0.52	21.66	7
0.54	22.13	7
0.55	21.89	7
0.56	21.37	7
0.58	20.61	7
0.59	20.28	7
0.6	20.02	7
0.61	19.65	7
0.63	19.22	7
0.64	18.92	7
0.66	18.21	7
0.67	17.36	7
0.69	16.02	7
0.7	14.91	7
0.72	14.19	7
0.73	13.39	7
0.74	12.52	7
0.76	11.89	7
0.77	11.24	7
0.78	10.01	7
0	0	8
0	0	8
0	0	8
0	0	8
0	0	8
0	0	8
0	0	8
0	0	8
0	0	8
0	0	8
0	0	8
0.01	0	8
0.01	0	8
0.01	0	8
0.01	0	8
0.01	0	8
0.02	0	8
0.02	0	8
0.03	0	8
0.04	0	8
0.05	0	8
0.06	0	8
0.07	0	8
0.08	0	8
0.08	0	8
0.09	0.19	8
0.1	0.46	8
0.11	0.74	8
0.12	1.07	8
0.13	1.36	8
0.14	1.62	8
0.16	1.96	8
0.17	2.31	8
0.18	2.66	8
0.19	3.06	8
0.2	3.4	8
0.21	3.74	8
0.23	4.17	8
0.24	4.61	8
0.25	5.07	8
0.26	5.65	8
0.27	6.11	8
0.28	6.61	8
0.29	7.23	8
0.31	7.77	8
0.31	8.32	8
0.33	9	8
0.34	9.6	8
0.35	10.18	8
0.36	10.9	8
0.37	11.54	8
0.38	12.18	8
0.4	13	8
0.41	13.76	8
0.42	14.48	8
0.43	15.23	8
0.44	16.04	8
0.45	16.65	8
0.46	17.55	8
0.47	18.31	8
0.49	19.11	8
0.49	19.79	8
0.5	20.48	8
0.51	21.29	8
0.52	21.92	8
0.53	22.47	8
0.54	23.17	8
0.55	23.65	8
0.56	24.08	8
0.58	24.39	8
0.59	24.43	8
0.6	24.43	8
0.61	24.35	8
0.63	22.26	8
0.66	14.01	8
0.69	11.49	8
0.7	10.76	8
0.71	10.07	8
0.72	8.98	8
0.74	8.48	8
0.75	8.19	8
0.76	7.89	8
0.77	7.62	8
0.79	7.32	8
0.8	6.91	8
0.8	6.28	8
0	0	9
0	0	9
0	0	9
0	0	9
0	0	9
0	0	9
0	0	9
0	0	9
0	0	9
0	0	9
0	0	9
0	0	9
0	0	9
0	0	9
0.01	0	9
0.01	0	9
0.01	0	9
0.01	0	9
0.02	0	9
0.02	0	9
0.03	0	9
0.04	0	9
0.05	0	9
0.06	0.09	9
0.07	0.22	9
0.08	0.34	9
0.09	0.48	9
0.1	0.63	9
0.11	0.83	9
0.12	1.1	9
0.13	1.3	9
0.13	1.57	9
0.14	1.95	9
0.15	2.28	9
0.16	2.65	9
0.18	3.11	9
0.19	3.54	9
0.2	3.98	9
0.21	4.52	9
0.22	4.99	9
0.23	5.49	9
0.24	6.08	9
0.25	6.62	9
0.27	7.18	9
0.28	7.88	9
0.29	8.49	9
0.3	9.09	9
0.31	9.89	9
0.32	10.54	9
0.33	11.2	9
0.35	11.99	9
0.36	12.69	9
0.37	13.45	9
0.38	14.21	9
0.39	14.84	9
0.4	15.55	9
0.41	16.37	9
0.42	17.07	9
0.43	17.78	9
0.45	18.57	9
0.45	19.33	9
0.47	19.91	9
0.48	20.6	9
0.49	21.17	9
0.5	21.7	9
0.51	21.84	9
0.53	20.88	9
0.54	18.27	9
0.56	14.7	9
0.57	14.24	9
0.58	13.71	9
0.6	12.9	9
0.61	12.19	9
0.62	11.49	9
0.63	10.32	9
0	0	10
0	0	10
0	0	10
0	0	10
0	0	10
0	0	10
0	0	10
0	0	10
0	0	10
0	0	10
0	0	10
0	0	10
0	0	10
0.01	0	10
0.01	0	10
0.01	0	10
0.01	0	10
0.02	0	10
0.03	0	10
0.04	0	10
0.05	0	10
0.05	0	10
0.07	0.02	10
0.08	0.1	10
0.09	0.2	10
0.1	0.32	10
0.11	0.42	10
0.12	0.52	10
0.13	0.63	10
0.14	0.76	10
0.15	0.94	10
0.16	1.13	10
0.17	1.35	10
0.18	1.65	10
0.19	1.94	10
0.2	2.28	10
0.21	2.76	10
0.22	3.19	10
0.24	3.62	10
0.25	4.17	10
0.26	4.64	10
0.27	5.15	10
0.29	5.77	10
0.3	6.32	10
0.31	6.87	10
0.32	7.54	10
0.33	8.1	10
0.34	8.67	10
0.35	9.4	10
0.36	10	10
0.37	10.58	10
0.39	11.25	10
0.4	11.79	10
0.41	12.34	10
0.42	12.98	10
0.43	13.47	10
0.44	13.93	10
0.45	14.49	10
0.46	14.91	10
0.47	15.35	10
0.48	15.89	10
0.49	16.34	10
0.51	16.86	10
0.52	17.26	10
0.53	17.68	10
0.54	18.08	10
0.55	18.51	10
0.56	18.89	10
0.57	19.31	10
0.58	19.68	10
0.59	19.99	10
0.6	20.26	10
0.62	20.62	10
0.63	20.92	10
0.64	21.27	10
0.65	21.61	10
0.66	21.9	10
0.67	22.3	10
0.68	22.61	10
0.69	22.91	10
0.71	23.23	10
0.72	23.56	10
0.73	23.88	10
0.74	24.11	10
0.75	24.21	10
0.76	23.72	10
0.83	5.29	10
0.84	4.41	10
0.85	4.06	10
0.86	3.8	10
0.88	3.54	10
0.89	3.21	10
0	0	11
0	0	11
0	0	11
0	0	11
0	0	11
0	0	11
0	0	11
0	0	11
0	0	11
0	0	11
0	0	11
0	0	11
0	0	11
0.01	0	11
0.01	0	11
0.01	0	11
0.01	0	11
0.01	0	11
0.01	0	11
0.02	0	11
0.02	0	11
0.03	0	11
0.04	0	11
0.05	0	11
0.06	0	11
0.07	0	11
0.08	0.02	11
0.09	0.07	11
0.1	0.13	11
0.11	0.22	11
0.12	0.37	11
0.12	0.51	11
0.13	0.69	11
0.14	0.93	11
0.15	1.2	11
0.16	1.51	11
0.18	1.97	11
0.19	2.39	11
0.2	2.83	11
0.21	3.42	11
0.22	3.94	11
0.23	4.48	11
0.25	5.17	11
0.25	5.77	11
0.27	6.38	11
0.28	7.1	11
0.29	7.7	11
0.3	8.31	11
0.31	9.19	11
0.32	9.75	11
0.33	10.52	11
0.34	11.21	11
0.35	11.81	11
0.36	12.48	11
0.37	13.26	11
0.38	13.86	11
0.39	14.43	11
0.41	15.02	11
0.42	15.52	11
0.43	15.94	11
0.44	16.38	11
0.45	16.26	11
0.47	12.64	11
0.49	11.08	11
0.5	10.23	11
0.52	9.73	11
0.53	9.02	11
0.54	8.42	11
0.55	8.03	11
0.57	7.61	11
0.58	7.4	11
0.59	7.14	11
0.6	6.67	11
0.61	6.17	11
0	0	12
0	0	12
0	0	12
0	0	12
0	0	12
0	0	12
0	0	12
0	0	12
0	0	12
0	0	12
0	0	12
0.01	0	12
0.02	0	12
0.03	0	12
0.03	0	12
0.04	0	12
0.05	0	12
0.06	0.01	12
0.07	0	12
0.08	0.01	12
0.1	0.01	12
0.1	0.01	12
0.12	0	12
0.13	0	12
0.14	0	12
0.15	0	12
0.17	0	12
0.18	0	12
0.19	0	12
0.2	0	12
0.21	0.01	12
0.22	0.01	12
0.23	0.02	12
0.25	0.04	12
0.26	0.13	12
0.27	0.2	12
0.29	0.27	12
0.3	0.36	12
0.31	0.44	12
0.32	0.56	12
0.33	0.73	12
0.35	0.91	12
0.36	1.1	12
0.37	1.37	12
0.38	1.63	12
0.39	1.92	12
0.41	2.33	12
0.42	2.69	12
0.43	3.09	12
0.44	3.59	12
0.45	4.03	12
0.46	4.53	12
0.48	5.13	12
0.49	5.63	12
0.5	6.15	12
0.51	6.8	12
0.52	7.34	12
0.53	7.85	12
0.55	8.5	12
0.56	9.01	12
0.57	9.52	12
0.58	10.1	12
0.59	10.56	12
0.6	11.04	12
0.62	11.59	12
0.62	11.99	12
0.63	12.39	12
0.65	12.85	12
0.66	13.24	12
0.67	13.61	12
0.68	14.05	12
0.69	14.45	12
0.71	14.88	12
0.72	15.3	12
0.73	15.64	12
0.74	16.03	12
0.75	16.5	12
0.76	16.85	12
0.77	17.16	12
0.79	17.28	12
0.8	17.35	12
0.81	17.3	12
0.83	14.04	12
0.84	13	12
0.86	12.7	12
0.87	12.47	12
0.88	12.2	12
0.9	12.03	12
0.91	11.73	12
0.92	11.13	12
0.94	10.5	12
0.95	9.53	12
0.96	8.8	12
0.98	8.22	12
0.99	7.6	12
0	0	13
0	0	13
0	0	13
0	0	13
0	0	13
0	0	13
0	0	13
0	0	13
0	0	13
0	0	13
0	0	13
0	0	13
0.01	0	13
0.01	0	13
0.01	0	13
0.01	0	13
0.01	0	13
0.02	0	13
0.03	0	13
0.03	0	13
0.05	0	13
0.06	0	13
0.06	0	13
0.07	0	13
0.08	0	13
0.09	0.01	13
0.1	0.01	13
0.11	0.01	13
0.11	0.01	13
0.13	0.01	13
0.14	0.01	13
0.15	0.01	13
0.16	0.01	13
0.17	0.01	13
0.18	0.01	13
0.19	0.01	13
0.21	0.01	13
0.22	0.01	13
0.23	0.02	13
0.24	0.02	13
0.25	0.03	13
0.26	0.03	13
0.28	0.04	13
0.29	0.04	13
0.3	0.05	13
0.31	0.06	13
0.32	0.07	13
0.34	0.08	13
0.35	0.1	13
0.36	0.13	13
0.37	0.16	13
0.38	0.21	13
0.4	0.26	13
0.41	0.31	13
0.42	0.38	13
0.43	0.43	13
0.44	0.49	13
0.46	0.56	13
0.47	0.63	13
0.48	0.69	13
0.49	0.78	13
0.51	0.86	13
0.52	0.96	13
0.53	1.08	13
0.54	1.25	13
0.56	1.48	13
0.57	1.78	13
0.58	2.04	13
0.59	2.33	13
0.61	2.69	13
0.61	3.01	13
0.63	3.33	13
0.64	3.75	13
0.65	4.11	13
0.66	4.49	13
0.67	4.97	13
0.69	5.38	13
0.7	5.81	13
0.71	6.33	13
0.72	6.78	13
0.74	7.23	13
0.75	7.8	13
0.76	8.26	13
0.77	8.75	13
0.78	9.31	13
0.79	9.78	13
0.81	10.26	13
0.82	10.85	13
0.83	11.31	13
0.84	10.83	13
0.85	11.27	13
0.86	11.69	13
0.87	12.09	13
0.89	12.54	13
0.9	12.88	13
0.91	13.22	13
0.92	13.61	13
0.93	13.94	13
0.95	14.29	13
0.96	14.5	13
0.97	14.67	13
0.98	14.82	13
0.99	14.88	13
1.01	14.9	13
1.02	14.78	13
1.03	14.7	13
1.04	14.54	13
1.05	14.11	13
1.06	13.88	13
1.08	13.58	13
1.09	13.27	13
1.1	13.08	13
1.12	12.86	13
1.13	12.67	13
1.14	12.39	13
1.15	11.99	13
1.17	11.55	13
1.18	11.2	13
1.19	10.79	13
1.21	10.17	13
1.22	9.43	13
1.23	8.79	13
1.25	8	13
1.26	7.42	13
1.27	6.81	13
1.28	5.91	13
0	0	14
0	0	14
0	0	14
0	0	14
0.01	0	14
0.01	0	14
0.02	0	14
0.03	0.02	14
0.04	0.05	14
0.05	0.06	14
0.05	0.07	14
0.06	0.09	14
0.07	0.12	14
0.09	0.17	14
0.1	0.21	14
0.11	0.27	14
0.12	0.32	14
0.13	0.37	14
0.14	0.43	14
0.15	0.49	14
0.17	0.56	14
0.18	0.64	14
0.19	0.73	14
0.2	0.84	14
0.22	0.99	14
0.22	1.14	14
0.24	1.38	14
0.25	1.72	14
0.26	2.01	14
0.27	2.31	14
0.28	2.69	14
0.3	3.03	14
0.31	3.39	14
0.32	3.88	14
0.33	4.32	14
0.34	4.78	14
0.36	5.32	14
0.36	5.8	14
0.38	6.29	14
0.39	6.88	14
0.4	7.38	14
0.41	7.89	14
0.42	8.52	14
0.43	9.06	14
0.44	9.6	14
0.46	10.28	14
0.47	10.87	14
0.48	11.44	14
0.49	12.11	14
0.5	12.72	14
0.51	13.32	14
0.52	14.02	14
0.53	14.58	14
0.54	15.16	14
0.55	15.84	14
0.56	16.39	14
0.57	16.94	14
0.59	17.57	14
0.6	18.08	14
0.61	18.61	14
0.62	19.12	14
0.63	19.52	14
0.64	19.75	14
0.66	16.1	14
0.7	4.98	14
0.72	4.45	14
0.73	4.06	14
0.74	3.8	14
0.75	3.62	14
0.76	3.19	14
0	0	15
0	0	15
0	0	15
0	0	15
0	0	15
0	0	15
0	0	15
0	0	15
0	0	15
0	0	15
0	0	15
0	0.01	15
0	0.23	15
0	0.5	15
0.01	0.9	15
0.01	1.3	15
0.01	1.71	15
0.01	2.3	15
0.02	2.88	15
0.02	3.49	15
0.03	4.33	15
0.04	5.06	15
0.04	5.9	15
0.05	6.95	15
0.06	7.92	15
0.07	8.88	15
0.08	10.02	15
0.08	10.94	15
0.09	12.02	15
0.1	13.1	15
0.1	14.02	15
0.11	14.93	15
0.12	15.98	15
0.13	16.96	15
0.14	17.85	15
0.15	18.92	15
0.16	19.7	15
0.17	20.53	15
0.18	21.43	15
0.19	21.64	15
0.2	22.04	15
0.21	22.36	15
0.22	22.47	15
0.23	22.28	15
0.24	21.89	15
0.26	20.71	15
0.27	19.84	15
0.29	18.15	15
0.31	13.87	15
0.33	12.84	15
0.34	12.27	15
0.35	11.88	15
0.37	11.5	15
0.38	10.99	15
0.4	10.44	15
0.41	9.93	15
0.42	9.24	15
0.43	8.95	15
0.45	8.54	15
0.46	7.64	15
0	0	16
0	0	16
0	0.01	16
0	0.1	16
0.01	0.2	16
0.02	0.37	16
0.03	0.56	16
0.04	0.78	16
0.05	1.06	16
0.06	1.33	16
0.06	1.59	16
0.07	1.97	16
0.08	2.3	16
0.09	2.64	16
0.1	3.08	16
0.11	3.49	16
0.12	3.93	16
0.14	4.52	16
0.15	5.08	16
0.16	5.69	16
0.17	6.46	16
0.18	7.17	16
0.19	7.9	16
0.21	7.84	16
0.21	8.67	16
0.22	9.49	16
0.24	10.51	16
0.25	11.39	16
0.25	12.29	16
0.27	13.27	16
0.28	14.2	16
0.29	15.09	16
0.3	16.19	16
0.31	17.11	16
0.32	17.94	16
0.33	19.13	16
0.34	20.01	16
0.35	20.94	16
0.36	22.01	16
0.37	22.79	16
0.38	23.72	16
0.39	24.61	16
0.41	25.35	16
0.41	25.78	16
0.43	26.31	16
0.44	26.03	16
0.45	26.07	16
0.46	25.47	16
0.48	24.43	16
0.49	23.41	16
0.5	22.72	16
0.52	22.04	16
0.53	21.06	16
0.55	19.31	16
0.56	18.02	16
0.57	16.31	16
0.59	13.51	16
0.61	12.7	16
0.62	12.16	16
0.63	11.06	16
0	0	17
0	0	17
0	0	17
0	0	17
0	0	17
0	0	17
0	0	17
0	0	17
0	0	17
0	0	17
0	0	17
0	0	17
0	0	17
0.01	0	17
0.01	0	17
0.01	0	17
0.01	0	17
0.02	0	17
0.02	0	17
0.03	0	17
0.04	0	17
0.05	0	17
0.06	0	17
0.07	0	17
0.08	0	17
0.09	0.08	17
0.1	0.15	17
0.11	0.22	17
0.12	0.3	17
0.13	0.38	17
0.14	0.48	17
0.15	0.61	17
0.16	0.77	17
0.18	0.94	17
0.19	1.16	17
0.2	1.35	17
0.21	1.56	17
0.22	1.85	17
0.23	2.11	17
0.25	2.4	17
0.26	2.76	17
0.27	3.08	17
0.28	3.42	17
0.29	3.86	17
0.3	4.25	17
0.31	4.65	17
0.32	5.14	17
0.34	5.59	17
0.34	6.03	17
0.36	6.58	17
0.37	7.04	17
0.38	7.61	17
0.39	8.05	17
0.4	8.52	17
0.42	9.09	17
0.43	9.58	17
0.44	10.04	17
0.45	10.62	17
0.46	11.11	17
0.47	11.57	17
0.48	12.12	17
0.49	12.57	17
0.5	13	17
0.51	13.49	17
0.52	13.86	17
0.53	14.25	17
0.55	14.74	17
0.56	15.09	17
0.57	15.4	17
0.58	15.85	17
0.59	16.18	17
0.6	16.49	17
0.62	16.93	17
0.63	17.25	17
0.64	17.55	17
0.65	17.93	17
0.66	18.16	17
0.67	18.39	17
0.68	18.72	17
0.69	19.02	17
0.7	19.26	17
0.72	19.57	17
0.73	19.83	17
0.74	20.07	17
0.75	20.41	17
0.76	20.65	17
0.77	20.94	17
0.79	21.29	17
0.8	21.64	17
0.81	21.83	17
0.82	21.99	17
0.83	22.19	17
0.84	22.23	17
0.86	22.39	17
0.87	22.49	17
0.88	22.62	17
0.89	22.67	17
0.9	22.63	17
0.91	22.53	17
0.93	22.25	17
0.94	21.97	17
0.95	21.5	17
0.97	20.56	17
0.98	19.55	17
1	17.97	17
1.02	15.41	17
1.04	13.62	17
1.05	12.22	17
1.07	10.96	17
1.08	10.09	17
1.1	9.37	17
1.11	8.35	17
0	0	18
0	0	18
0	0	18
0	0.09	18
0	0.22	18
0.01	0.39	18
0.02	0.53	18
0.03	0.7	18
0.04	0.92	18
0.05	1.15	18
0.06	1.4	18
0.07	1.75	18
0.08	2.07	18
0.09	2.44	18
0.1	2.92	18
0.11	3.41	18
0.11	3.98	18
0.12	4.91	18
0.13	5.62	18
0.14	6.45	18
0.16	7.55	18
0.17	8.53	18
0.18	9.58	18
0.19	10.81	18
0.2	11.82	18
0.21	12.71	18
0.22	13.76	18
0.23	14.59	18
0.24	15.33	18
0.25	16.1	18
0.27	16.65	18
0.28	17.09	18
0.29	17.62	18
0.3	17.8	18
0.31	18.05	18
0.32	18.07	18
0.33	18.37	18
0.34	18.64	18
0.36	18.96	18
0.37	19.17	18
0.38	19.16	18
0.39	19.09	18
0.41	19.17	18
0.42	19.33	18
0.43	19.73	18
0.44	20.1	18
0.45	20.32	18
0.47	20.55	18
0.48	20.67	18
0.49	20.84	18
0.5	20.93	18
0.51	21.07	18
0.52	21.17	18
0.53	21.33	18
0.54	21.37	18
0.55	21.4	18
0.56	21.2	18
0.58	21.03	18
0.59	20.74	18
0.6	20.33	18
0.61	19.69	18
0.63	18.85	18
0.64	17.72	18
0.66	16.61	18
0.67	15.17	18
0.69	13.39	18
0.7	12.2	18
0.72	11.28	18
0.73	10.12	18
0.75	9.35	18
0.76	8.82	18
0.77	8.06	18
0.78	7.52	18
0.8	6.92	18
0.81	6.5	18
0.82	6.2	18
0.84	5.8	18
0.85	5.5	18
0.86	5.17	18
0.87	4.6	18
0.87	4.35	18
0	0	19
0	0	19
0	0	19
0	0	19
0	0	19
0.01	0	19
0.02	0.02	19
0.03	0.09	19
0.04	0.17	19
0.05	0.26	19
0.06	0.35	19
0.07	0.45	19
0.08	0.58	19
0.09	0.7	19
0.1	0.87	19
0.11	1.09	19
0.12	1.3	19
0.13	1.51	19
0.14	1.78	19
0.15	2.03	19
0.16	2.29	19
0.18	2.65	19
0.19	2.99	19
0.2	3.35	19
0.21	3.84	19
0.22	4.26	19
0.23	4.74	19
0.24	5.33	19
0.25	5.87	19
0.26	6.42	19
0.27	7.07	19
0.28	7.65	19
0.3	8.24	19
0.3	8.97	19
0.31	9.59	19
0.33	10.25	19
0.34	11.04	19
0.35	11.72	19
0.36	12.4	19
0.37	13.14	19
0.38	13.73	19
0.39	14.32	19
0.4	14.78	19
0.41	15.21	19
0.42	15.67	19
0.44	16.1	19
0.45	16.51	19
0.46	17.01	19
0.47	17.45	19
0.48	17.9	19
0.49	18.48	19
0.5	18.95	19
0.51	19.44	19
0.52	19.9	19
0.54	20.32	19
0.55	20.73	19
0.56	21.31	19
0.57	21.82	19
0.58	22.12	19
0.59	22.58	19
0.6	22.95	19
0.61	23.29	19
0.62	23.68	19
0.63	23.75	19
0.65	23.92	19
0.66	24.27	19
0.67	24.67	19
0.68	24.94	19
0.69	24.94	19
0.71	24.79	19
0.72	24.84	19
0.73	24.95	19
0.74	25.09	19
0.75	25.16	19
0.76	25.28	19
0.78	24.98	19
0.79	24.39	19
0.81	23.36	19
0.82	21.9	19
0.84	20.13	19
0.86	17.38	19
0.88	15.02	19
0.9	13.33	19
0.91	12.21	19
0.93	10.65	19
0.94	9.9	19
0.96	9.12	19
0.96	8.25	19
0	0	20
0	0	20
0	0	20
0	0	20
0	0.1	20
0.01	0.22	20
0.02	0.34	20
0.03	0.47	20
0.04	0.57	20
0.05	0.69	20
0.06	0.88	20
0.07	1.07	20
0.08	1.25	20
0.09	1.47	20
0.1	1.66	20
0.11	1.89	20
0.12	2.18	20
0.14	2.47	20
0.15	2.78	20
0.16	3.23	20
0.17	3.63	20
0.18	4.07	20
0.19	4.7	20
0.2	5.27	20
0.21	5.87	20
0.23	6.62	20
0.24	7.29	20
0.25	7.97	20
0.26	8.82	20
0.27	9.55	20
0.28	10.28	20
0.3	11.15	20
0.31	11.93	20
0.31	12.72	20
0.33	13.73	20
0.34	14.4	20
0.35	15.19	20
0.36	16.08	20
0.37	16.37	20
0.38	17.12	20
0.39	17.48	20
0.4	18.1	20
0.41	18.8	20
0.42	19.58	20
0.43	20.2	20
0.44	20.75	20
0.45	21.41	20
0.46	21.9	20
0.48	22.27	20
0.49	22.6	20
0.5	22.68	20
0.51	22.81	20
0.52	23.28	20
0.53	23.72	20
0.54	24.13	20
0.56	24.65	20
0.57	25.08	20
0.58	25.46	20
0.59	25.51	20
0.6	25.96	20
0.61	26.2	20
0.62	26.55	20
0.63	26.84	20
0.64	26.97	20
0.65	27.31	20
0.67	27.53	20
0.68	27.8	20
0.69	27.99	20
0.7	28.11	20
0.72	28.26	20
0.73	28.37	20
0.74	28.53	20
0.75	28.63	20
0.76	28.55	20
0.77	28.4	20
0.79	28.19	20
0.8	27.38	20
0.82	24.67	20
0.84	21.3	20
0.85	17.77	20
0.88	13.64	20
0.89	12.16	20
0.91	11.12	20
0.92	10.42	20
0.94	9.78	20
0.94	8.77	20
0	0.01	21
0	0.01	21
0	0.02	21
0	0.14	21
0	0.28	21
0.01	0.41	21
0.02	0.53	21
0.03	0.65	21
0.04	0.8	21
0.05	0.92	21
0.06	1.06	21
0.07	1.23	21
0.07	1.38	21
0.09	1.54	21
0.1	1.74	21
0.11	1.92	21
0.12	2.12	21
0.13	2.37	21
0.14	2.62	21
0.14	2.8	21
0.15	2.88	21
0.17	3.22	21
0.18	3.52	21
0.19	3.87	21
0.2	4.32	21
0.21	4.73	21
0.22	5.18	21
0.23	5.77	21
0.24	6.3	21
0.25	6.86	21
0.26	7.57	21
0.27	8.21	21
0.29	8.9	21
0.3	9.75	21
0.31	10.5	21
0.32	11.3	21
0.33	12.21	21
0.34	12.99	21
0.35	13.78	21
0.36	14.67	21
0.37	15.44	21
0.38	16.19	21
0.39	17.06	21
0.4	17.75	21
0.41	18.34	21
0.42	19.12	21
0.44	19.35	21
0.44	19.87	21
0.45	20.51	21
0.46	21.1	21
0.48	21.8	21
0.49	22.22	21
0.5	22.71	21
0.5	23.24	21
0.52	23.35	21
0.53	23.7	21
0.54	24.23	21
0.55	24.62	21
0.56	24.7	21
0.58	24.95	21
0.59	25.17	21
0.6	25.39	21
0.61	25.35	21
0.62	25.15	21
0.63	24.77	21
0.65	23.8	21
0.66	22.92	21
0.68	21.75	21
0.69	20.24	21
0.71	19.25	21
0.72	18	21
0.74	16.25	21
0.76	14.61	21
0.77	12.96	21
0.79	11.54	21
0	0	22
0	0	22
0	0	22
0	0.03	22
0	0.36	22
0.01	0.76	22
0.01	1	22
0.02	1.27	22
0.03	1.53	22
0.03	1.7	22
0.04	1.82	22
0.05	1.93	22
0.06	2.01	22
0.07	2.08	22
0.08	2.25	22
0.09	2.45	22
0.1	2.63	22
0.12	2.87	22
0.13	3.08	22
0.13	3.27	22
0.15	3.49	22
0.16	3.68	22
0.17	3.87	22
0.18	4.13	22
0.19	4.39	22
0.2	4.74	22
0.21	5.21	22
0.22	5.62	22
0.24	6.09	22
0.25	6.62	22
0.26	7.13	22
0.27	7.62	22
0.28	8.24	22
0.3	8.85	22
0.3	9.46	22
0.32	10.28	22
0.33	10.91	22
0.34	11.7	22
0.35	12.63	22
0.36	13.43	22
0.37	13.85	22
0.38	14.69	22
0.39	15.78	22
0.4	16.43	22
0.41	17.61	22
0.42	18.4	22
0.43	19.5	22
0.44	20.58	22
0.45	21.27	22
0.46	22.46	22
0.47	23.32	22
0.48	24.21	22
0.49	25.17	22
0.5	26.35	22
0.51	27.48	22
0.52	28.39	22
0.53	29.39	22
0.54	30.06	22
0.54	30.87	22
0.56	31.65	22
0.57	32.54	22
0.57	33.07	22
0.59	33.84	22
0.6	34.43	22
0.6	34.6	22
0.62	35.17	22
0.63	35.39	22
0.64	34.46	22
0.67	28.15	22
0.7	21.78	22
0.72	18.06	22
0.74	15.73	22
0.75	14.61	22
0.77	13.78	22
0.78	12.5	22
0	0	23
0	-0.01	23
0	-0.01	23
0	0.07	23
0	0.29	23
0.01	0.67	23
0.01	1.15	23
0.02	1.55	23
0.03	1.94	23
0.04	2.48	23
0.05	2.95	23
0.06	3.38	23
0.07	3.91	23
0.08	4.36	23
0.09	4.84	23
0.1	5.44	23
0.11	6.01	23
0.12	6.59	23
0.13	7.36	23
0.14	8.06	23
0.15	7.93	23
0.16	8.89	23
0.17	9.71	23
0.18	10.62	23
0.19	11.66	23
0.2	12.61	23
0.21	13.67	23
0.22	14.86	23
0.23	15.89	23
0.24	16.95	23
0.25	18.23	23
0.27	19.27	23
0.27	20.38	23
0.29	21.59	23
0.3	22.6	23
0.31	23.64	23
0.32	24.76	23
0.32	24.9	23
0.33	25.54	23
0.35	26.39	23
0.36	26.99	23
0.36	27.34	23
0.38	27.67	23
0.39	27.56	23
0.4	27.31	23
0.41	27.76	23
0.43	27.34	23
0.44	26.52	23
0.45	25.58	23
0.47	23.9	23
0.48	22.48	23
0.5	20.25	23
0.51	18.64	23
0.53	16.67	23
0.54	14.64	23
0.56	13.45	23
0.57	12.53	23
0.58	11.7	23
0.6	11.13	23
0.61	10.6	23
0.63	10.08	23
0.64	9.54	23
0.64	8.81	23
0	0	24
0	0	24
0	0	24
0	0	24
0	0	24
0.01	0.02	24
0.02	0.11	24
0.03	0.24	24
0.04	0.34	24
0.05	0.45	24
0.06	0.61	24
0.06	0.77	24
0.07	0.99	24
0.08	1.36	24
0.09	1.76	24
0.1	2.17	24
0.12	2.71	24
0.12	3.23	24
0.14	3.81	24
0.15	4.53	24
0.16	5.2	24
0.16	5.92	24
0.18	6.7	24
0.19	7.47	24
0.2	8.24	24
0.21	9.15	24
0.22	9.84	24
0.23	10.59	24
0.24	11.54	24
0.25	12.41	24
0.26	13.34	24
0.27	14.27	24
0.28	14.65	24
0.3	15.47	24
0.31	16.46	24
0.31	17.22	24
0.32	17.86	24
0.34	18.67	24
0.35	19.35	24
0.36	19.96	24
0.37	20.5	24
0.38	21.01	24
0.39	21.1	24
0.4	21.62	24
0.41	21.9	24
0.42	22.19	24
0.43	22.58	24
0.45	22.93	24
0.45	23.27	24
0.47	23.61	24
0.48	23.96	24
0.49	24.11	24
0.5	24.19	24
0.52	24.38	24
0.53	24.51	24
0.54	24.58	24
0.55	24.73	24
0.56	24.81	24
0.57	25	24
0.58	24.89	24
0.59	24.57	24
0.61	23.62	24
0.63	21.57	24
0.65	17.39	24
0.67	14.42	24
0.69	12.87	24
0.7	12.14	24
0.72	11.52	24
0.73	11.05	24
0.74	10.52	24
0.75	9.49	24
0	0	25
0	0	25
0	0	25
0	0	25
0	0	25
0	0	25
0	0	25
0	0	25
0	0	25
0	0	25
0	0	25
0	0	25
0.01	0	25
[truncated: 1,373 more rows]

## Sheet: Giant-Puncture
Species		Date	Trial #	Segement #	Individual #
B. craniifer		2013-02-14	8	T2	1
Puncture Testing Raw Data			9	T3	1
			10	A2	1
Disp (mm)	Force (N)	Trial #	11	A3	1
0	0.1	8	12	A4	1
0	0.1	8	13	A5	1
0	0.09	8	14	A6	1
0	0.09	8	15	T2	2
0	0.09	8	16	T3	2
0	0.16	8	17	A2	2
0	0.36	8	18	A3	2
0	0.55	8	19	A4	2
0.01	0.73	8	20	A5	2
0.03	0.91	8	21	A6	2
0.03	1.03	8
0.05	1.13	8
0.06	1.26	8
0.07	1.36	8
0.08	1.48	8
0.09	1.62	8
0.1	1.73	8
0.12	1.83	8
0.13	1.94	8
0.14	2.03	8
0.16	2.11	8
0.17	2.21	8
0.18	2.3	8
0.19	2.4	8
0.21	2.51	8
0.22	2.65	8
0.23	2.86	8
0.24	3.12	8
0.25	3.36	8
0.27	3.62	8
0.28	4.07	8
0.29	4.52	8
0.3	5.05	8
0.31	5.73	8
0.32	6.3	8
0.33	6.91	8
0.35	7.62	8
0.36	8.19	8
0.37	8.78	8
0.39	9.4	8
0.4	10.08	8
0.41	10.69	8
0.42	11.44	8
0.43	11.96	8
0.44	12.47	8
0.45	12.76	8
0.46	13.14	8
0.47	10.86	8
0.49	7.82	8
0.51	7.14	8
0.52	6.36	8
0.53	5.61	8
0.54	5.02	8
0.56	4.7	8
0.57	4.34	8
0.59	4.08	8
0.6	2.86	8
0.62	2.8	8
0.63	1.3	8
0.64	1.31	8
0.65	1.32	8
0.66	1.31	8
0.67	1.32	8
0.69	1.34	8
0.7	1.29	8
0.7	1.22	8
0.7	1.18	8
0.7	1.16	8
0.7	1.15	8
0	-0.01	9
0	-0.01	9
0	-0.01	9
0	0.24	9
0	0.66	9
0.01	1	9
0.02	1.35	9
0.04	1.76	9
0.05	2.08	9
0.06	2.41	9
0.07	2.78	9
0.08	3.07	9
0.09	3.33	9
0.11	3.57	9
0.12	3.77	9
0.13	3.95	9
0.14	4.14	9
0.15	4.27	9
0.17	4.39	9
0.18	4.53	9
0.19	4.64	9
0.2	4.76	9
0.21	4.02	9
0.23	3.94	9
0.24	3.96	9
0.26	4.01	9
0.26	3.93	9
0.28	3.91	9
0.29	3.96	9
0.3	4.15	9
0.31	4.37	9
0.33	4.68	9
0.34	4.98	9
0.35	5.33	9
0.36	5.8	9
0.37	6.22	9
0.38	6.67	9
0.4	7.2	9
0.41	7.64	9
0.42	8.16	9
0.43	8.64	9
0.44	9.1	9
0.46	9.53	9
0.47	10.08	9
0.48	10.5	9
0.49	10.82	9
0.51	11.13	9
0.52	11.33	9
0.53	11.46	9
0.54	11.63	9
0.55	11.9	9
0.56	12.18	9
0.58	12.49	9
0.59	12.74	9
0.6	13.01	9
0.62	12.19	9
0.63	11.13	9
0.64	10.71	9
0.66	10.14	9
0.67	9.33	9
0.69	8.19	9
0.7	7.13	9
0.72	6.16	9
0.73	5.75	9
0.74	5.44	9
0.76	5.21	9
0.77	4.94	9
0.78	4.69	9
0.79	4.5	9
0.81	4.35	9
0.82	4.21	9
0.83	4.07	9
0.85	3.92	9
0.86	3.79	9
0.87	3.7	9
0.89	3.6	9
0.9	3.47	9
0.91	3.42	9
0.93	3.4	9
0.94	3.38	9
0.95	3.38	9
0.96	3.35	9
0.97	3.06	9
0.97	2.86	9
0	0	10
0	0	10
0	0	10
0	0	10
0	0	10
0	0	10
0	0	10
0.01	0	10
0.01	0	10
0.02	0	10
0.03	0	10
0.04	0.01	10
0.05	0.03	10
0.07	0.04	10
0.08	0.06	10
0.09	0.09	10
0.1	0.12	10
0.11	0.15	10
0.12	0.17	10
0.13	0.2	10
0.14	0.22	10
0.15	0.24	10
0.16	0.27	10
0.17	0.31	10
0.18	0.36	10
0.2	0.48	10
0.21	0.59	10
0.22	0.71	10
0.23	0.88	10
0.24	1.04	10
0.25	1.22	10
0.27	1.45	10
0.28	1.66	10
0.29	1.9	10
0.31	2.17	10
0.32	2.43	10
0.33	2.69	10
0.34	3.09	10
0.35	3.51	10
0.37	4.05	10
0.38	4.72	10
0.39	5.31	10
0.4	5.81	10
0.41	6.2	10
0.42	6.42	10
0.43	6.58	10
0.45	6.73	10
0.46	6.81	10
0.47	6.87	10
0.48	6.89	10
0.5	6.98	10
0.51	7.02	10
0.52	7.09	10
0.54	7.17	10
0.55	7.25	10
0.56	7.4	10
0.57	7.46	10
0.58	7.56	10
0.6	7.65	10
0.61	7.68	10
0.62	7.66	10
0.63	7.67	10
0.64	7.66	10
0.65	7.55	10
0.67	7.32	10
0.68	7.2	10
0.69	7.14	10
0.71	7.16	10
0.73	2.54	10
0.74	2.49	10
0.76	2.46	10
0.77	2.43	10
0.78	2.36	10
0.79	2.27	10
0.8	1.87	10
0.8	1.76	10
0.8	1.68	10
0.8	1.64	10
0	0.01	11
0	0.01	11
0	0.01	11
0	0.02	11
0	0.03	11
0	0.04	11
0	0.06	11
0	0.07	11
0	0.08	11
0	0.1	11
0	0.11	11
0	0.12	11
0	0.14	11
0	0.15	11
0.01	0.15	11
0.02	0.18	11
0.02	0.19	11
0.03	0.21	11
0.04	0.25	11
0.05	0.3	11
0.06	0.37	11
0.08	0.47	11
0.09	0.58	11
0.1	0.71	11
0.11	0.91	11
0.12	1.09	11
0.12	1.28	11
0.13	1.57	11
0.14	1.84	11
0.16	2.12	11
0.17	2.46	11
0.18	2.77	11
0.19	3.06	11
0.2	3.3	11
0.21	3.45	11
0.22	3.61	11
0.24	3.82	11
0.25	3.99	11
0.26	4.15	11
0.27	4.35	11
0.28	4.52	11
0.29	4.69	11
0.31	4.91	11
0.32	5.08	11
0.33	5.23	11
0.34	5.42	11
0.35	5.54	11
0.36	5.66	11
0.38	5.82	11
0.39	5.89	11
0.4	5.97	11
0.42	6.05	11
0.43	5.98	11
0.44	4.77	11
0.46	4.01	11
0.47	3.67	11
0.48	3.25	11
0.5	2.87	11
0.51	2.51	11
0.52	2.25	11
0.53	2.07	11
0.54	1.89	11
0.55	1.67	11
0.57	1.56	11
0.58	1.5	11
0.59	1.45	11
0.61	1.41	11
0.62	1.39	11
0.63	1.18	11
0.63	1.02	11
0	0.01	12
0	0.01	12
0	0.01	12
0	0.03	12
0	0.06	12
0.01	0.09	12
0.02	0.1	12
0.03	0.11	12
0.05	0.11	12
0.06	0.12	12
0.08	0.12	12
0.09	0.12	12
0.1	0.12	12
0.11	0.13	12
0.13	0.14	12
0.14	0.16	12
0.15	0.18	12
0.16	0.22	12
0.17	0.25	12
0.19	0.29	12
0.2	0.35	12
0.21	0.4	12
0.22	0.47	12
0.24	0.55	12
0.25	0.64	12
0.26	0.73	12
0.27	0.85	12
0.29	0.96	12
0.3	1.06	12
0.31	1.2	12
0.32	1.31	12
0.33	1.42	12
0.35	1.56	12
0.36	1.68	12
0.37	1.79	12
0.39	1.92	12
0.4	2.02	12
0.41	2.13	12
0.42	2.26	12
0.43	2.38	12
0.44	2.48	12
0.45	2.61	12
0.47	2.73	12
0.48	2.83	12
0.49	2.97	12
0.5	3.09	12
0.52	3.2	12
0.53	3.2	12
0.54	3.35	12
0.55	3.47	12
0.57	3.61	12
0.58	3.73	12
0.59	3.84	12
0.6	3.94	12
0.61	4.04	12
0.62	4.17	12
0.64	4.32	12
0.65	4.44	12
0.66	4.57	12
0.67	4.63	12
0.68	4.69	12
0.7	4.62	12
0.71	4.83	12
0.72	4.99	12
0.73	5.11	12
0.75	5.22	12
0.76	5.31	12
0.77	5.4	12
0.78	5.46	12
0.8	5.47	12
0.81	5.54	12
0.82	5.6	12
0.83	5.61	12
0.85	1.21	12
0.86	1.37	12
0.87	1.47	12
0.89	1.54	12
0.9	1.58	12
0.9	1.48	12
0	0	13
0	0	13
0	0	13
0	0	13
0	0	13
0.01	0	13
0.02	0	13
0.03	0.01	13
0.04	0.02	13
0.05	0.03	13
0.06	0.04	13
0.07	0.04	13
0.08	0.04	13
0.1	0.04	13
0.11	0.05	13
0.12	0.05	13
0.13	0.06	13
0.14	0.08	13
0.15	0.09	13
0.17	0.13	13
0.18	0.15	13
0.19	0.19	13
0.2	0.24	13
0.21	0.29	13
0.22	0.35	13
0.24	0.44	13
0.25	0.52	13
0.26	0.62	13
0.27	0.75	13
0.29	0.86	13
0.3	1	13
0.31	1.19	13
0.32	1.36	13
0.33	1.55	13
0.35	1.79	13
0.36	2	13
0.37	2.21	13
0.38	2.44	13
0.4	2.68	13
0.41	2.91	13
0.42	1	13
0.43	0.96	13
0.44	1.01	13
0.46	1.09	13
0.47	1.1	13
0.48	1.14	13
0.5	1.19	13
0.51	1.22	13
0.52	1.21	13
0.53	0.4	13
0.55	0.41	13
0.56	0.42	13
0.57	0.42	13
0.58	0.38	13
0.59	0.35	13
0.61	0.37	13
0.62	0.38	13
0.62	0.35	13
0	0	14
0	0	14
0	0	14
0	0	14
0	0	14
0	0	14
0	0	14
0	0	14
0	0	14
0	0	14
0	0	14
0	0	14
0	0	14
0	0	14
0	0	14
0.01	0	14
0.01	0	14
0.01	0	14
0.01	0	14
0.01	0	14
0.02	0	14
0.03	0	14
0.04	0	14
0.05	0	14
0.06	0	14
0.07	0	14
0.08	0	14
0.08	0	14
0.1	0	14
0.11	0.02	14
0.12	0.04	14
0.12	0.08	14
0.13	0.14	14
0.14	0.18	14
0.15	0.2	14
0.17	0.21	14
0.18	0.22	14
0.19	0.23	14
0.2	0.24	14
0.21	0.25	14
0.23	0.26	14
0.24	0.28	14
0.25	0.29	14
0.26	0.31	14
0.28	0.34	14
0.29	0.38	14
0.3	0.42	14
0.31	0.44	14
0.32	0.51	14
0.33	0.59	14
0.35	0.69	14
0.36	0.79	14
0.37	0.9	14
0.38	1.05	14
0.4	1.2	14
0.41	1.38	14
0.42	1.54	14
0.43	1.72	14
0.45	1.94	14
0.46	2.14	14
0.47	2.35	14
0.48	2.53	14
0.5	2.7	14
0.51	2.88	14
0.52	3.1	14
0.53	3.3	14
0.54	3.51	14
0.56	3.76	14
0.56	3.96	14
0.58	3.98	14
0.59	0.75	14
0.61	0.84	14
0.62	0.92	14
0.63	0.66	14
0.64	0.66	14
0.64	0.63	14
0	0	15
0	0	15
0	0	15
0	0	15
0	0	15
0	0	15
0.01	0	15
0.01	0	15
0.02	0	15
0.03	0	15
0.04	0	15
0.05	0	15
0.06	0	15
0.07	0	15
0.07	0.06	15
0.08	0.24	15
0.09	0.45	15
0.1	0.67	15
0.11	0.85	15
0.12	1.05	15
0.13	1.3	15
0.15	1.51	15
0.16	1.73	15
0.17	2	15
0.18	2.24	15
0.19	2.46	15
0.21	2.76	15
0.22	3.01	15
0.23	3.28	15
0.25	3.62	15
0.26	3.93	15
0.27	4.27	15
0.29	4.7	15
0.29	5.06	15
0.31	5.44	15
0.32	5.92	15
0.33	6.36	15
0.34	6.77	15
0.35	7.3	15
0.37	7.76	15
0.38	8.32	15
0.39	8.79	15
0.4	9.24	15
0.42	9.78	15
0.44	5.56	15
0.45	5.65	15
0.46	6.01	15
0.47	6.27	15
0.48	6.48	15
0.5	6.77	15
0.51	6.79	15
0.52	6.39	15
0.53	6.1	15
0.54	5.61	15
0.55	5.59	15
0.57	5.62	15
0.58	5.61	15
0.59	5.58	15
0.61	5.16	15
0.62	4.72	15
0.63	4.46	15
0.65	3.83	15
0.66	3.45	15
0.67	3.18	15
0.69	1.16	15
0.7	1.11	15
0.71	1.1	15
0.73	1.09	15
0.73	1.03	15
0.73	1.01	15
0	0	16
0	0	16
0	0	16
0	0	16
0	0	16
0.01	0	16
0.02	0	16
0.03	0	16
0.05	0	16
0.05	0.11	16
0.06	0.28	16
0.07	0.41	16
0.08	0.53	16
0.09	0.69	16
0.1	0.82	16
0.11	0.93	16
0.12	1.04	16
0.13	1.13	16
0.14	1.19	16
0.15	1.26	16
0.16	1.29	16
0.17	1.3	16
0.19	1.29	16
0.2	1.25	16
0.21	1.2	16
0.22	1.12	16
0.23	1.04	16
0.25	0.98	16
0.26	0.93	16
0.27	0.9	16
0.28	0.88	16
0.29	0.86	16
0.31	0.85	16
0.32	0.85	16
0.33	0.87	16
0.34	0.9	16
0.36	0.94	16
0.37	1.02	16
0.38	1.11	16
0.39	1.21	16
0.41	1.37	16
0.42	1.52	16
0.43	1.7	16
0.45	1.93	16
0.46	2.16	16
0.47	2.43	16
0.48	2.76	16
0.49	3.04	16
0.5	3.33	16
0.52	3.67	16
0.53	3.97	16
0.54	4.27	16
0.55	4.66	16
0.56	4.99	16
0.58	5.32	16
0.59	5.72	16
0.6	6.03	16
0.62	5.24	16
0.63	5.35	16
0.64	5.46	16
0.65	5.56	16
0.67	5.42	16
0.68	5.31	16
0.69	5.33	16
0.7	5.25	16
0.71	5.19	16
0.73	5.09	16
0.74	5.08	16
0.75	5.13	16
0.76	5.19	16
0.77	5.17	16
0.79	5.12	16
0.8	5.07	16
0.81	5.05	16
0.82	5.03	16
0.84	4.72	16
0.85	4.4	16
0.86	4.27	16
0.88	3.82	16
0.89	3.58	16
0.9	3.48	16
0.91	3.41	16
0.92	3.34	16
0.94	3.3	16
0.95	3.28	16
0.96	3.17	16
0.97	3.13	16
0.98	3.08	16
1	3.05	16
1.01	3.01	16
1.02	2.97	16
1.04	2.88	16
1.05	2.74	16
1.06	2.61	16
1.07	2.53	16
1.09	2.47	16
1.1	2.38	16
1.11	2.14	16
1.12	2.09	16
1.14	1.29	16
1.15	1.18	16
1.16	1.09	16
1.17	0.99	16
1.17	0.93	16
0	0	17
0	0	17
0	0	17
0	0	17
0	0	17
0	0	17
0	0	17
0.01	0	17
0.02	0	17
0.03	0	17
0.03	0	17
0.05	0	17
0.06	0	17
0.06	0	17
0.07	0	17
0.09	0.03	17
0.1	0.05	17
0.1	0.08	17
0.11	0.12	17
0.13	0.15	17
0.14	0.17	17
0.15	0.2	17
0.16	0.22	17
0.17	0.23	17
0.19	0.26	17
0.2	0.28	17
0.21	0.31	17
0.22	0.36	17
0.23	0.41	17
0.24	0.46	17
0.26	0.52	17
0.27	0.57	17
0.28	0.63	17
0.29	0.7	17
0.31	0.77	17
0.32	0.84	17
0.33	0.92	17
0.34	0.99	17
0.35	1.07	17
0.37	1.16	17
0.38	1.24	17
0.39	1.32	17
0.41	1.41	17
0.42	1.49	17
0.42	1.57	17
0.44	1.67	17
0.45	1.76	17
0.46	1.84	17
0.47	1.95	17
0.49	2.04	17
0.5	2.13	17
0.51	2.24	17
0.52	2.34	17
0.53	2.43	17
0.55	2.53	17
0.56	2.63	17
0.57	2.72	17
0.58	2.81	17
0.59	2.88	17
0.61	2.98	17
0.62	3.09	17
0.63	3.17	17
0.64	3.25	17
0.65	3.36	17
0.66	3.46	17
0.67	3.56	17
0.69	3.68	17
0.7	3.78	17
0.71	3.88	17
0.73	4.01	17
0.74	4.1	17
0.75	4.21	17
0.76	4.33	17
0.77	4.42	17
0.79	4.53	17
0.8	4.64	17
0.81	4.7	17
0.82	4.77	17
0.83	4.87	17
0.85	1.92	17
0.86	1.88	17
0.87	1.96	17
0.89	2.07	17
0.9	2.13	17
0.91	2.17	17
0.92	2.21	17
0.94	2.21	17
0	0	18
0	0	18
0	0	18
0	0	18
0	0	18
0	0	18
0	0	18
0.01	0	18
0.02	0	18
0.03	0	18
0.04	0	18
0.05	0	18
0.06	0.02	18
0.07	0.05	18
0.08	0.09	18
0.09	0.11	18
0.1	0.12	18
0.11	0.13	18
0.12	0.14	18
0.13	0.15	18
0.14	0.16	18
0.15	0.16	18
0.16	0.17	18
0.18	0.18	18
0.19	0.19	18
0.2	0.22	18
0.21	0.27	18
0.22	0.32	18
0.23	0.37	18
0.25	0.44	18
0.26	0.49	18
0.27	0.56	18
0.28	0.62	18
0.3	0.68	18
0.31	0.76	18
0.32	0.82	18
0.33	0.88	18
0.35	0.96	18
0.36	1.02	18
0.37	1.08	18
0.38	1.17	18
0.4	1.24	18
0.41	1.31	18
0.42	1.39	18
0.43	1.47	18
0.44	1.56	18
0.45	1.65	18
0.47	1.74	18
0.48	1.84	18
0.49	1.95	18
0.5	2.04	18
0.52	2.12	18
0.53	2.23	18
0.54	2.34	18
0.55	2.43	18
0.57	2.56	18
0.58	2.66	18
0.59	2.77	18
0.6	2.89	18
0.61	2.98	18
0.62	3.1	18
0.64	3.22	18
0.65	3.31	18
0.66	3.42	18
0.67	3.54	18
0.68	3.65	18
0.69	3.75	18
0.71	3.88	18
0.72	3.97	18
0.73	4.08	18
0.74	4.23	18
0.75	4.35	18
0.77	4.47	18
0.78	4.61	18
0.79	4.73	18
0.8	4.83	18
0.82	4.93	18
0.83	5.02	18
0.84	5.06	18
0.85	5.11	18
0.86	5.2	18
0.87	5.3	18
0.89	5.38	18
0.9	5.45	18
0.91	5.54	18
0.92	5.62	18
0.94	5.71	18
0.95	5.31	18
0.96	4.64	18
0.98	3.47	18
0.99	2.91	18
1.01	2.63	18
1.02	2.46	18
1.03	2.35	18
1.04	2.37	18
1.05	2.34	18
1.06	2.28	18
1.08	2.13	18
1.09	2	18
1.1	1.85	18
1.11	1.73	18
1.13	1.65	18
1.14	1.59	18
1.15	1.49	18
1.16	1.41	18
1.18	1.34	18
0.01	0	19
0.01	0	19
0.01	0	19
0.01	0	19
0.01	0	19
0.01	0	19
0.01	0	19
0.02	0	19
0.03	0	19
0.04	0	19
0.05	0	19
0.06	0	19
0.07	0.02	19
0.08	0.05	19
0.09	0.08	19
0.1	0.12	19
0.11	0.16	19
0.12	0.19	19
0.13	0.24	19
0.13	0.28	19
0.14	0.33	19
0.15	0.4	19
0.17	0.47	19
0.18	0.54	19
0.19	0.63	19
0.2	0.71	19
0.21	0.79	19
0.23	0.88	19
0.24	0.96	19
0.25	1.04	19
0.26	1.12	19
0.27	1.19	19
0.29	1.25	19
0.3	1.34	19
0.31	1.42	19
0.32	1.5	19
0.34	1.59	19
0.35	1.67	19
0.36	1.75	19
0.37	1.84	19
0.38	1.92	19
0.39	1.99	19
0.41	2.09	19
0.42	2.17	19
0.43	2.24	19
0.44	2.31	19
0.46	2.39	19
0.47	2.48	19
0.48	2.54	19
0.49	2.61	19
0.51	2.69	19
0.52	2.79	19
0.53	2.86	19
0.54	2.92	19
0.55	2.99	19
0.56	3.04	19
0.57	3.1	19
0.58	3.2	19
0.6	3.28	19
0.61	3.37	19
0.62	3.45	19
0.63	3.51	19
0.64	3.56	19
0.66	3.62	19
0.67	3.66	19
0.68	3.7	19
0.7	3.75	19
0.71	3.76	19
0.72	3.76	19
0.73	3.78	19
0.74	3.35	19
0.75	3.38	19
0.77	2.5	19
0.78	2.46	19
0.79	2.07	19
0.81	2.04	19
0.82	1.85	19
0.83	1.74	19
0.84	1.66	19
0.86	1.57	19
0.86	1.47	19
0.87	1.32	19
0.87	1.26	19
0	0	20
0	0	20
0	0	20
0	0	20
0	0	20
0.01	0	20
0.02	0	20
0.03	0.02	20
0.04	0.05	20
0.05	0.06	20
0.06	0.09	20
0.07	0.11	20
0.08	0.13	20
0.09	0.16	20
0.1	0.18	20
0.11	0.21	20
0.12	0.25	20
0.13	0.28	20
0.14	0.33	20
0.15	0.4	20
0.17	0.46	20
0.18	0.53	20
0.19	0.62	20
0.21	0.71	20
0.21	0.8	20
0.23	0.9	20
0.24	1	20
0.26	1.08	20
0.27	1.17	20
0.28	1.24	20
0.29	1.32	20
0.31	1.4	20
0.32	1.47	20
0.33	1.55	20
0.35	1.65	20
0.36	1.73	20
0.37	1.81	20
0.38	1.92	20
0.39	2	20
0.4	2.09	20
0.41	2.2	20
0.42	2.29	20
0.44	2.39	20
0.45	2.49	20
0.46	2.59	20
0.48	2.69	20
0.49	2.78	20
0.5	2.87	20
0.51	2.95	20
0.52	3.06	20
0.54	3.15	20
0.54	3.26	20
0.56	3.38	20
0.57	3.48	20
0.58	3.57	20
0.59	3.68	20
0.6	3.76	20
0.61	3.84	20
0.63	3.97	20
0.63	4.07	20
0.65	4.18	20
0.66	4.27	20
0.67	4.35	20
0.68	4.44	20
0.7	4.45	20
0.72	4.61	20
0.73	4.43	20
0.74	4.48	20
0.75	4.5	20
0.76	4.52	20
0.77	3.28	20
0.78	3.18	20
0.8	3.09	20
0.81	3.05	20
0.82	2.87	20
0.84	2.66	20
0.84	2.53	20
0.86	2.47	20
0.87	2.38	20
0.89	2.26	20
0.9	2.13	20
0.91	2.06	20
0.92	1.99	20
0.93	1.65	20
0	0	21
0	0	21
0	0	21
0	0	21
0	0	21
0	0	21
0.01	0	21
0.02	0	21
0.03	0	21
0.03	0	21
0.04	0	21
0.05	0	21
0.06	0	21
0.07	0.01	21
0.09	0.03	21
0.1	0.03	21
0.1	0.04	21
0.11	0.05	21
0.12	0.05	21
0.13	0.06	21
0.14	0.06	21
0.15	0.06	21
0.17	0.07	21
0.18	0.08	21
0.19	0.09	21
0.2	0.1	21
0.21	0.11	21
0.23	0.11	21
0.24	0.12	21
0.25	0.12	21
0.26	0.12	21
0.27	0.14	21
0.29	0.19	21
0.3	0.25	21
0.31	0.33	21
0.32	0.44	21
0.34	0.55	21
0.34	0.67	21
0.36	0.81	21
0.37	0.94	21
0.38	1.07	21
0.4	1.23	21
0.41	1.35	21
0.42	1.48	21
0.43	1.62	21
0.44	1.73	21
0.45	1.85	21
0.46	1.98	21
0.48	2.08	21
0.49	2.19	21
0.5	2.33	21
0.51	2.44	21
0.52	2.54	21
0.54	2.59	21
0.55	2.68	21
0.56	2.78	21
0.57	2.92	21
0.59	2.99	21
0.6	3.07	21
0.61	3.16	21
0.62	3.24	21
0.63	3.31	21
0.65	3.36	21
0.66	3.41	21
0.67	3.45	21
0.68	3.32	21
0.69	3.21	21
0.7	3.19	21
0.72	3.21	21
0.72	3.22	21
0.74	3.12	21
0.75	2.91	21
0.76	2.53	21
0.78	2.25	21
0.79	2.11	21
0.8	1.95	21
0.81	1.86	21
0.83	1.74	21
0.84	1.6	21
0.85	1.51	21
0.86	1.41	21
0.88	1.38	21
Species		Date	Trial #	Segement #	Individual #
B. craniifer		2013-02-28	1	T2	1
Puncture Testing Raw Data			2	T3	1
			3	A2	1
Disp (mm)	Force (N)	Trial #	4	A3	1
0	0	1	5	A4	1
0	0	1	6	A5	1
0	0	1	7	A6	1
0	0	1
0.01	0	1
0.02	0	1
0.03	0	1
0.05	0	1
0.05	0	1
0.06	0	1
0.08	0	1
0.09	0	1
0.1	0	1
0.11	0	1
0.12	0	1
0.14	0	1
0.15	0	1
0.16	0	1
0.18	0	1
0.19	0	1
0.2	0	1
0.21	0	1
0.22	0	1
0.23	0	1
0.24	0	1
0.26	0	1
0.27	0	1
0.28	0	1
0.3	0	1
0.31	0	1
0.31	0	1
0.33	0	1
0.35	0	1
0.36	0	1
0.37	0	1
0.38	0	1
0.39	0	1
0.41	0	1
0.42	0	1
0.43	0	1
0.44	0	1
0.45	0	1
0.46	0	1
0.48	0	1
0.49	0	1
0.5	0	1
0.52	0	1
0.53	0	1
0.54	0	1
0.56	0	1
0.57	0	1
0.58	0	1
0.59	0	1
0.61	0	1
0.62	0	1
0.63	0	1
0.64	0	1
0.65	0	1
0.67	0	1
0.68	0	1
0.69	0	1
0.7	0	1
0.71	0	1
0.73	0	1
0.74	0	1
0.75	0	1
0.77	0	1
0.78	0	1
0.79	0	1
0.8	0	1
0.82	0	1
0.83	0	1
0.84	0	1
0.85	0	1
0.86	0	1
0.88	0	1
0.89	0	1
0.9	0	1
0.92	0	1
0.93	0	1
0.94	0	1
0.95	0.17	1
0.96	0.37	1
0.98	0.56	1
0.99	0.78	1
1	0.95	1
1.01	1.13	1
1.03	1.39	1
1.04	1.6	1
1.05	1.82	1
1.06	2.05	1
1.07	2.24	1
1.08	2.42	1
1.1	2.64	1
1.11	2.83	1
1.12	3.01	1
1.13	3.25	1
1.15	3.53	1
1.15	3.82	1
1.17	4.21	1
1.18	4.53	1
1.19	4.91	1
1.21	5.38	1
1.22	5.79	1
1.23	6.21	1
1.24	6.77	1
1.25	7.21	1
1.26	7.68	1
1.27	8.23	1
1.28	8.69	1
1.29	9.16	1
1.31	9.6	1
1.31	9.98	1
1.33	9.77	1
1.34	9.83	1
1.35	10.26	1
1.36	10.69	1
1.37	11.12	1
1.39	8.7	1
1.4	8.36	1
1.41	8.36	1
1.42	8.48	1
1.44	8.71	1
1.45	9	1
1.46	9.22	1
1.47	9.39	1
1.49	7.39	1
1.5	6.75	1
1.51	6.75	1
1.52	6.77	1
1.54	6.49	1
1.55	6.26	1
1.56	5.53	1
1.57	4.72	1
1.58	4.13	1
1.6	3.59	1
1.61	2.42	1
1.62	2.2	1
1.64	2.03	1
1.65	1.92	1
1.66	1.8	1
1.67	1.6	1
1.67	1.5	1
1.67	1.44	1
0	0	2
0	0	2
0	0	2
0	0.06	2
0	0.14	2
0	0.23	2
0.01	0.31	2
0.02	0.37	2
0.03	0.42	2
0.04	0.46	2
0.05	0.57	2
0.07	0.76	2
0.08	0.91	2
0.09	1.08	2
0.1	1.29	2
0.12	1.49	2
0.13	1.71	2
0.14	1.94	2
0.15	2.16	2
0.16	2.34	2
0.18	2.53	2
0.18	2.65	2
0.2	2.8	2
0.21	2.97	2
0.22	3.09	2
0.23	3.21	2
0.25	3.36	2
0.26	3.45	2
0.27	3.49	2
0.29	3.52	2
0.3	3.6	2
0.31	3.61	2
0.32	3.69	2
0.33	3.83	2
0.34	4.03	2
0.36	4.25	2
0.37	4.46	2
0.38	4.66	2
0.39	4.92	2
0.4	5.19	2
0.41	5.46	2
0.43	5.94	2
0.44	6.27	2
0.45	6.68	2
0.46	7.17	2
0.47	7.65	2
0.49	8.06	2
0.5	8.62	2
0.51	9.13	2
0.52	9.72	2
0.53	9.88	2
0.55	10	2
0.56	8.94	2
0.57	8.39	2
0.58	7.99	2
0.6	7.61	2
0.61	6.89	2
0.62	6.49	2
0.63	6.12	2
0.65	5.77	2
0.66	5.44	2
0.67	5.09	2
0.69	4.68	2
0.7	4.13	2
0.71	3.61	2
0.73	2.84	2
0.74	2.46	2
0.75	2.13	2
0.77	1.72	2
0.78	1.62	2
0.79	1.61	2
0.8	1.47	2
0	0	3
0	0	3
0	0	3
0	0	3
0	0	3
0	0.03	3
0.02	0.08	3
0.02	0.12	3
0.03	0.17	3
0.05	0.23	3
0.06	0.28	3
0.07	0.34	3
0.09	0.43	3
0.1	0.51	3
0.11	0.61	3
0.12	0.75	3
0.13	0.88	3
0.15	1.01	3
0.16	1.18	3
0.17	1.33	3
0.18	1.48	3
0.2	1.69	3
0.21	1.88	3
0.22	2.06	3
0.23	2.31	3
0.24	2.54	3
0.25	2.76	3
0.26	3.04	3
0.28	3.29	3
0.29	3.53	3
0.3	3.82	3
0.31	4.07	3
0.32	4.3	3
0.33	4.61	3
0.35	4.82	3
0.36	5.02	3
0.37	5.24	3
0.38	5.37	3
0.39	5.42	3
0.41	5	3
0.42	4.39	3
0.43	3.98	3
0.45	1.28	3
0.46	1.09	3
0.47	0.99	3
0.49	0.9	3
0.5	0.86	3
0.51	0.81	3
0.53	0.77	3
0.54	0.66	3
0.54	0.58	3
0.54	0.54	3
0	0	4
0	0	4
0	0.02	4
0	0.05	4
0.02	0.08	4
0.03	0.1	4
0.04	0.12	4
0.05	0.15	4
0.06	0.19	4
0.07	0.23	4
0.09	0.3	4
0.1	0.37	4
0.1	0.44	4
0.12	0.55	4
0.13	0.64	4
0.14	0.75	4
0.16	0.9	4
0.17	1.04	4
0.18	1.19	4
0.2	1.41	4
0.21	1.59	4
0.22	1.77	4
0.23	1.97	4
0.24	2.16	4
0.25	2.37	4
0.27	2.64	4
0.28	2.89	4
0.29	3.14	4
0.3	3.45	4
0.31	3.68	4
0.32	3.92	4
0.34	4.17	4
0.34	4.3	4
0.36	4.42	4
0.37	4.58	4
0.38	4.72	4
0.39	4.85	4
0.41	5.03	4
0.42	5.14	4
0.43	5.27	4
0.44	5.42	4
0.45	5.53	4
0.46	5.64	4
0.48	5.76	4
0.49	5.87	4
0.5	5.96	4
0.51	6.08	4
0.52	6.2	4
0.53	6.31	4
0.55	6.43	4
0.56	6.54	4
0.57	6.66	4
0.58	6.8	4
0.59	6.89	4
0.6	6.98	4
0.62	7.08	4
0.63	6.95	4
0.64	6.94	4
0.67	2.49	4
0.68	2.64	4
0.69	2.69	4
0.7	2.71	4
0.71	2.7	4
0.72	2.52	4
0.73	2.43	4
0.75	2.33	4
0.76	2.25	4
0.77	2.09	4
0.78	2.02	4
0.8	1.94	4
0.8	1.7	4
0	0	5
0	0	5
0	0	5
0	0.02	5
0	0.06	5
0.01	0.1	5
0.02	0.12	5
0.04	0.14	5
0.05	0.15	5
0.06	0.15	5
0.07	0.15	5
0.09	0.15	5
0.1	0.15	5
0.11	0.16	5
0.12	0.18	5
0.13	0.21	5
0.14	0.24	5
0.15	0.28	5
0.17	0.34	5
0.18	0.4	5
0.19	0.48	5
0.21	0.59	5
0.22	0.67	5
0.23	0.79	5
0.24	0.95	5
0.25	1.11	5
0.27	1.29	5
0.28	1.53	5
0.29	1.76	5
0.3	1.96	5
0.31	2.25	5
0.32	2.51	5
0.34	2.79	5
0.35	3.12	5
0.36	3.4	5
0.37	3.52	5
0.38	3.88	5
0.4	4.18	5
0.41	4.35	5
0.42	4.68	5
0.43	4.94	5
0.44	5.18	5
0.46	4.78	5
0.48	1.61	5
0.49	0.99	5
0.5	1.05	5
0.52	1.1	5
0.52	1.14	5
0.54	1.13	5
0	0	6
0	0	6
0	0	6
0	0	6
0	0	6
0	0.01	6
0.02	0.03	6
0.03	0.04	6
0.04	0.06	6
0.05	0.1	6
0.07	0.14	6
0.08	0.2	6
0.09	0.3	6
0.1	0.41	6
0.12	0.53	6
0.13	0.71	6
0.14	0.87	6
0.15	1.03	6
0.17	1.25	6
0.18	1.44	6
0.19	1.63	6
0.2	1.86	6
0.21	2.04	6
0.22	2.17	6
0.23	2.25	6
0.25	2.31	6
0.26	2.41	6
0.27	2.57	6
0.29	2.64	6
0.3	2.78	6
0.31	2.94	6
0.32	3.03	6
0.33	3.12	6
0.34	3.04	6
0.36	3.03	6
0.37	2.6	6
0.38	2.65	6
0.39	2.64	6
0.4	2.35	6
0.42	2.29	6
0.43	2.24	6
0.44	2.29	6
0.45	2.39	6
0.46	2.42	6
0.48	2.45	6
0.49	2.5	6
0.5	2.57	6
0.52	0.72	6
0.53	0.72	6
0.54	0.73	6
0.55	0.73	6
0.57	0.73	6
0.58	0.74	6
0	0	7
0	0	7
0	0	7
0	0.01	7
0	0.03	7
0.01	0.04	7
0.02	0.06	7
0.03	0.08	7
0.04	0.1	7
0.05	0.11	7
0.07	0.12	7
0.08	0.13	7
0.09	0.13	7
0.1	0.14	7
0.11	0.14	7
0.12	0.14	7
0.14	0.14	7
0.15	0.15	7
0.16	0.16	7
0.17	0.18	7
0.18	0.21	7
0.2	0.24	7
0.21	0.28	7
0.22	0.33	7
0.23	0.4	7
0.24	0.48	7
0.25	0.57	7
0.27	0.67	7
0.28	0.82	7
0.29	0.97	7
0.3	1.13	7
0.32	1.35	7
0.33	1.55	7
0.34	1.79	7
0.35	2.09	7
0.36	2.38	7
0.37	2.68	7
0.39	3.02	7
0.4	3.33	7
0.41	3.67	7
0.42	4.03	7
0.43	4.36	7
0.44	4.71	7
0.46	5.17	7
0.47	5.56	7
0.48	5.89	7
0.5	2.26	7
0.51	2.36	7
0.52	2.43	7
0.53	2.51	7
0.55	2.52	7
0.56	2.52	7
0.57	2.47	7
0.58	2.32	7
0.6	1.28	7
0.6	1.11	7
Species		Date	Trial #	Segement #	Individual #
B. craniifer		2013-03-04	1	T2	1
Puncture Testing Raw Data			2	T3	1
			3	A2	1
Disp (mm)	Force (N)	Trial #	4	A3	1
0	0	1	5	A4	1
0	0	1	6	A5	1
0	0	1	7	A6	1
0	0	1	8	T2	2
0	0.1	1	9	T3	2
0	0.24	1	10	A2	2
0	0.48	1	11	A3	2
0.01	0.68	1	12	A4	2
0.02	0.88	1	13	A5	2
0.03	1.1	1	14	A6	2
0.04	1.28	1	15	T2	3
0.05	1.46	1	16	T3	3
0.06	1.69	1	17	A2	3
0.07	1.89	1	18	A3	3
0.08	2.1	1	19	A4	3
0.09	2.35	1	20	A5	3
0.1	2.57	1	21	A6	3
0.11	2.81	1
0.13	3.12	1
0.14	3.4	1
0.15	3.71	1
0.16	4.13	1
0.17	4.52	1
0.19	4.94	1
0.2	5.51	1
0.21	5.99	1
0.22	6.51	1
0.23	7.15	1
0.24	7.67	1
0.25	8.22	1
0.27	8.91	1
0.28	9.51	1
0.29	10.08	1
0.3	7.98	1
0.32	7.67	1
0.33	6.79	1
0.34	6.04	1
0.35	5.95	1
0.37	5.96	1
0.38	4.96	1
0.4	4.8	1
0.41	4.74	1
0.42	4.66	1
0.43	4.58	1
0.45	3.99	1
0.46	3.98	1
0.47	4	1
0.48	4	1
0.5	3.98	1
0.51	2.69	1
0.52	2.67	1
0.53	2.63	1
0.54	2.56	1
0.56	2.49	1
0.57	2.29	1
0.57	2.16	1
0	0	2
0	0	2
0	0	2
0	0	2
0	0	2
0	0	2
0	0	2
0	0	2
0	0	2
0	0	2
0	0	2
0	0	2
0.01	0	2
0.01	0	2
0.02	0	2
0.03	0	2
0.04	0	2
0.05	0.01	2
0.06	0.03	2
0.07	0.1	2
0.08	0.22	2
0.09	0.51	2
0.1	0.78	2
0.11	1.04	2
0.12	1.32	2
0.13	1.53	2
0.14	1.73	2
0.16	1.94	2
0.17	2.1	2
0.18	2.25	2
0.19	2.46	2
0.2	2.61	2
0.21	2.76	2
0.23	2.93	2
0.24	3.05	2
0.25	3.18	2
0.27	3.34	2
0.28	3.48	2
0.29	3.62	2
0.31	1.68	2
0.32	1.79	2
0.33	1.95	2
0.34	2.15	2
0.35	2.32	2
0.36	2.49	2
0.38	2.69	2
0.39	2.88	2
0.4	3.08	2
0.42	3.32	2
0.43	3.57	2
0.44	3.78	2
0.45	4.02	2
0.46	4.25	2
0.47	4.53	2
0.49	4.83	2
0.5	5.13	2
0.51	5.46	2
0.52	5.84	2
0.53	6.04	2
0.54	6.1	2
0.56	6.03	2
0.57	6.18	2
0.58	6.32	2
0.59	6.48	2
0.6	6.57	2
0.61	6.6	2
0.63	6.57	2
0.64	4.63	2
0.65	4.4	2
0.67	4.27	2
0.68	4.13	2
0.69	3.96	2
0.71	3.85	2
0.72	3.81	2
0.73	3.86	2
0.74	3.91	2
0.75	3.96	2
0.76	3.98	2
0.78	3.92	2
0.78	3.93	2
0.8	3.91	2
0.81	3.77	2
0.82	3.34	2
0.83	2.76	2
0.85	2.51	2
0.86	2.35	2
0.87	2.23	2
0.88	2.12	2
0.9	2.03	2
0.91	1.95	2
0.92	1.8	2
0.93	1.81	2
0.94	1.82	2
0.96	1.53	2
0.97	1.48	2
0.98	1.4	2
0.99	1.42	2
1	1.35	2
1.02	1.35	2
1.03	1.33	2
1.04	1.27	2
1.05	1.2	2
1.07	0.95	2
1.08	0.83	2
1.09	0.79	2
1.11	0.78	2
1.12	0.72	2
0	0	3
0	0	3
0	0	3
0	0	3
0	0	3
0	0	3
0	0	3
0	0	3
0	0	3
0	0	3
0	0	3
0	0	3
0	0	3
0	0	3
0.01	0	3
0.02	0	3
0.03	0	3
0.04	0.02	3
0.05	0.03	3
0.07	0.05	3
0.08	0.05	3
0.09	0.06	3
0.1	0.06	3
0.11	0.07	3
0.12	0.07	3
0.13	0.07	3
0.14	0.07	3
0.15	0.08	3
0.16	0.08	3
0.17	0.09	3
0.18	0.1	3
0.2	0.1	3
0.21	0.11	3
0.22	0.12	3
0.23	0.14	3
0.25	0.16	3
0.26	0.19	3
0.27	0.23	3
0.28	0.27	3
0.3	0.32	3
0.31	0.39	3
0.32	0.47	3
0.33	0.54	3
0.35	0.65	3
0.36	0.75	3
0.36	0.83	3
0.38	0.93	3
0.39	1.02	3
0.4	1.1	3
0.42	1.2	3
0.43	1.28	3
0.44	1.36	3
0.45	1.47	3
0.46	1.55	3
0.48	1.65	3
0.49	1.76	3
0.5	1.86	3
0.52	1.96	3
0.53	2.07	3
0.54	2.18	3
0.55	2.27	3
0.56	2.39	3
0.57	2.48	3
0.58	2.58	3
0.6	2.65	3
0.61	1.96	3
0.62	1.94	3
0.64	1.69	3
0.65	1.5	3
0.66	1.33	3
0.68	1.29	3
0.69	1.3	3
0.7	1.25	3
0.71	1.2	3
0.72	1.18	3
0.74	1.16	3
0.75	1.13	3
0.76	1.1	3
0.77	1.06	3
0.79	1.04	3
0.8	0.99	3
0.81	0.94	3
0.82	0.9	3
0.83	0.88	3
0.84	0.84	3
0.86	0.8	3
0.87	0.78	3
0.88	0.76	3
0.89	0.72	3
0.91	0.7	3
0.92	0.67	3
0.94	0.62	3
0.94	0.54	3
0	0	4
0	0	4
0	0	4
0	0	4
0	0.01	4
0.01	0.03	4
0.02	0.05	4
0.03	0.06	4
0.04	0.06	4
0.06	0.07	4
0.06	0.07	4
0.07	0.08	4
0.08	0.09	4
0.1	0.09	4
0.1	0.09	4
0.11	0.09	4
0.13	0.09	4
0.14	0.09	4
0.15	0.1	4
0.16	0.1	4
0.18	0.1	4
0.19	0.1	4
0.2	0.12	4
0.21	0.13	4
0.22	0.15	4
0.23	0.17	4
0.25	0.18	4
0.26	0.21	4
0.27	0.23	4
0.29	0.26	4
0.3	0.29	4
0.31	0.33	4
0.32	0.38	4
0.34	0.43	4
0.35	0.49	4
0.36	0.54	4
0.37	0.59	4
0.38	0.66	4
0.4	0.72	4
0.41	0.77	4
0.42	0.85	4
0.43	0.91	4
0.44	0.97	4
0.45	1.04	4
0.47	1.1	4
0.48	1.17	4
0.49	1.23	4
0.51	1.3	4
0.52	1.36	4
0.53	1.44	4
0.54	1.49	4
0.55	1.36	4
0.56	1.44	4
0.57	1.5	4
0.59	1.51	4
0.6	1.49	4
0.61	1.52	4
0.62	1.57	4
0.63	1.6	4
0.65	1.65	4
0.66	1.69	4
0.67	1.71	4
0.68	1.73	4
0.69	1.76	4
0.71	1.75	4
0.72	1.65	4
0.73	1.62	4
0.75	1.63	4
0.76	1.62	4
0.77	1.54	4
0.78	1.44	4
0.79	1.38	4
0.8	1.36	4
0.82	1.36	4
0.83	1.33	4
0.84	1.27	4
0.85	1.22	4
0.86	1.21	4
0.88	1.11	4
0.89	0.99	4
0.9	0.98	4
0.92	0.98	4
0.93	0.93	4
0.94	0.9	4
0.95	0.86	4
0.97	0.82	4
0.98	0.79	4
0.99	0.73	4
1	0.68	4
1.02	0.65	4
1.03	0.63	4
1.04	0.62	4
1.05	0.6	4
1.06	0.58	4
1.08	0.56	4
1.09	0.55	4
1.1	0.51	4
0	0	5
0	0	5
0	0	5
0	0	5
0	0	5
[truncated: 1,468 more rows]

## Sheet: American-Puncture
Species		Date	Trial #	Segement #	Individual #
P. americana		2013-01-24	1	T2	1
Puncture Testing Raw Data			2	T3	1
			3	A2	1
Disp (mm)	Force (N)	Trial #	4	A3	1
0	0	1	5	A4	1
0	0	1	6	A5	1
0	0	1	7	A6	1
0	0	1	8	T2	2
0	0	1	9	T3	2
0	0.02	1	10	A2	2
0.02	0.06	1	11	A3	2
0.03	0.1	1	12	A4	2
0.04	0.14	1	13	A5	2
0.05	0.17	1	14	A6	2
0.06	0.19	1
0.08	0.21	1
0.09	0.23	1
0.1	0.25	1
0.12	0.26	1
0.12	0.26	1
0.14	0.27	1
0.15	0.26	1
0.16	0.26	1
0.18	0.25	1
0.19	0.25	1
0.2	0.25	1
0.21	0.26	1
0.22	0.27	1
0.23	0.29	1
0.25	0.31	1
0.26	0.33	1
0.27	0.36	1
0.29	0.4	1
0.3	0.44	1
0.31	0.49	1
0.32	0.55	1
0.33	0.6	1
0.35	0.66	1
0.36	0.73	1
0.37	0.8	1
0.38	0.87	1
0.4	0.96	1
0.41	1.04	1
0.42	1.11	1
0.43	1.21	1
0.44	1.3	1
0.46	1.39	1
0.47	1.49	1
0.48	1.57	1
0.49	1.64	1
0.51	1.7	1
0.52	1.74	1
0.53	1.76	1
0.54	1.81	1
0.55	1.87	1
0.57	1.92	1
0.58	1.97	1
0.59	2.02	1
0.6	2.06	1
0.62	2.12	1
0.63	2.13	1
0.64	2.18	1
0.65	2.24	1
0.66	2.27	1
0.67	2.33	1
0.69	2.39	1
0.7	2.42	1
0.71	2.47	1
0.72	2.44	1
0.74	2.41	1
0.75	2.39	1
0.76	2.41	1
0.77	2.44	1
0.79	2.48	1
0.8	2.51	1
0.81	2.51	1
0.83	2.58	1
0.84	2.68	1
0.85	2.76	1
0.86	2.85	1
0.87	2.94	1
0.88	3.01	1
0.89	3.11	1
0.91	3.21	1
0.92	3.28	1
0.93	3.35	1
0.95	3.44	1
0.96	3.46	1
0.97	3.46	1
0.99	3.45	1
1	3.41	1
1.01	3.33	1
1.03	3.31	1
1.04	3.35	1
1.05	3.37	1
1.06	1.9	1
1.07	1.91	1
1.09	2	1
1.1	1.8	1
1.11	1.68	1
1.12	1.05	1
1.14	0.97	1
1.15	0.98	1
1.16	0.93	1
1.16	0.83	1
1.16	0.78	1
1.16	0.76	1
1.16	0.75	1
0	0	2
0.02	0.01	2
0.0299997	0.04	2
0.04	0.12	2
0.0499997	0.22	2
0.0699997	0.31	2
0.0799999	0.38	2
0.0899997	0.49	2
0.0999999	0.57	2
0.11	0.64	2
0.13	0.72	2
0.14	0.77	2
0.15	0.82	2
0.17	0.88	2
0.18	0.94	2
0.19	1	2
0.2	1.08	2
0.21	1.16	2
0.22	0.79	2
0.24	0.89	2
0.25	1.01	2
0.26	1.13	2
0.27	1.28	2
0.29	1.4	2
0.3	0.99	2
0.31	1.06	2
0.33	1.23	2
0.34	1.39	2
0.35	1.59	2
0.36	1.77	2
0.37	1.93	2
0.38	2.11	2
0.39	2.07	2
0.41	2.29	2
0.42	2.61	2
0.43	2.79	2
0.44	2.62	2
0.46	2.7	2
0.47	2.06	2
0.48	1.91	2
0.5	1.79	2
0.51	1.85	2
0.52	1.87	2
0.53	1.93	2
0.54	1.99	2
0.56	2.04	2
0.57	2.12	2
0.58	2.18	2
0.59	2.24	2
0.6	2.3	2
0.62	2.37	2
0.63	2.43	2
0.64	2.5	2
0.65	2.57	2
0.66	2.6	2
0.68	2.67	2
0.69	2.7	2
0.7	2.71	2
0.71	2.66	2
0.73	2.64	2
0.74	2.63	2
0.75	2.61	2
0.77	2.59	2
0.78	2.59	2
0.79	2.59	2
0.8	2.6	2
0.81	2.62	2
0.83	2.62	2
0.84	2.55	2
0.85	2.5	2
0.86	2.45	2
0.87	2.08	2
0.89	1.97	2
0.9	1.65	2
0.91	1.57	2
0.93	1.54	2
0.94	1.5	2
0.95	1.47	2
0.96	1.45	2
0.98	1.42	2
0.99	1.39	2
1	1.36	2
1.01	1.25	2
1.02	1.13	2
1.04	0.86	2
1.05	0.66	2
1.06	0.58	2
1.07	0.46	2
1.09	0.43	2
1.1	0.4	2
1.11	0.38	2
1.13	0.36	2
1.14	0.35	2
1.15	0.35	2
1.17	0.35	2
1.18	0.34	2
1.19	0.33	2
1.2	0.3	2
1.2	0.28	2
1.2	0.27	2
0	0	3
0.02	0.03	3
0.03	0.06	3
0.04	0.08	3
0.05	0.11	3
0.0699999	0.13	3
0.0799999	0.14	3
0.0899999	0.15	3
0.0999999	0.16	3
0.11	0.16	3
0.13	0.16	3
0.14	0.17	3
0.15	0.15	3
0.16	0.13	3
0.18	0.11	3
0.19	0.1	3
0.2	0.09	3
0.22	0.09	3
0.23	0.09	3
0.24	0.09	3
0.25	0.09	3
0.26	0.1	3
0.28	0.1	3
0.29	0.11	3
0.3	0.11	3
0.31	0.11	3
0.32	0.12	3
0.34	0.11	3
0.35	0.1	3
0.36	0.1	3
0.37	0.12	3
0.39	0.14	3
0.4	0.17	3
0.41	0.2	3
0.42	0.23	3
0.44	0.27	3
0.45	0.34	3
0.46	0.41	3
0.47	0.48	3
0.49	0.58	3
0.5	0.68	3
0.51	0.77	3
0.52	0.86	3
0.54	0.98	3
0.54	1.12	3
0.56	0.95	3
0.57	1.09	3
0.58	1.18	3
0.6	0.27	3
0.61	0.26	3
0.62	0.26	3
0.63	0.26	3
0.65	0.25	3
0.66	0.25	3
0.67	0.25	3
0.68	0.24	3
0.69	0.23	3
0.71	0.22	3
0.72	0.22	3
0.73	0.2	3
0.74	0.19	3
0.75	0.18	3
0.76	0.18	3
0.78	0.18	3
0.79	0.18	3
0.8	0.17	3
0.81	0.17	3
0.83	0.16	3
0.84	0.16	3
0.85	0.15	3
0.86	0.15	3
0.88	0.14	3
0.89	0.14	3
0.9	0.14	3
0.91	0.13	3
0.93	0.13	3
0.94	0.13	3
0.95	0.13	3
0.96	0.13	3
0.97	0.13	3
0.98	0.12	3
1	0.12	3
1.01	0.12	3
1.02	0.12	3
1.03	0.11	3
1.05	0.11	3
1.06	0.1	3
1.07	0.1	3
1.08	0.09	3
1.09	0.09	3
1.11	0.09	3
1.11	0.08	3
1.12	0.07	3
0	0	4
0	0	4
0	0	4
0	0	4
0	0	4
0	0	4
0	0	4
0.01	0	4
0.02	0	4
0.03	0	4
0.05	0	4
0.06	0.01	4
0.07	0	4
0.08	0.01	4
0.09	0.01	4
0.11	0.01	4
0.12	0.01	4
0.13	0.01	4
0.14	0.01	4
0.16	0.01	4
0.17	0.01	4
0.18	0.01	4
0.19	0.01	4
0.2	0.01	4
0.21	0.01	4
0.22	0.01	4
0.24	0.01	4
0.25	0.01	4
0.26	0.01	4
0.27	0.01	4
0.29	0.02	4
0.3	0.02	4
0.31	0.02	4
0.33	0.03	4
0.34	0.04	4
0.35	0.05	4
0.36	0.07	4
0.38	0.09	4
0.39	0.12	4
0.4	0.15	4
0.41	0.19	4
0.42	0.23	4
0.44	0.29	4
0.45	0.34	4
0.46	0.41	4
0.47	0.49	4
0.49	0.55	4
0.5	0.61	4
0.51	0.68	4
0.52	0.74	4
0.53	0.8	4
0.54	0.86	4
0.56	0.92	4
0.57	0.97	4
0.58	1.03	4
0.59	1.08	4
0.61	1.12	4
0.62	1.18	4
0.63	1.22	4
0.64	1.25	4
0.66	1.3	4
0.66	1.34	4
0.67	1.38	4
0.69	1.42	4
0.7	1.47	4
0.71	1.51	4
0.72	1.55	4
0.74	1.53	4
0.75	1.58	4
0.76	1.62	4
0.78	1.11	4
0.79	1.23	4
0.8	1.32	4
0.81	1.33	4
0.83	1.3	4
0.84	1.26	4
0.85	1.27	4
0.86	0.92	4
0.87	0.76	4
0.89	0.6	4
0.9	0.27	4
0.91	0.25	4
0.92	0.26	4
0.93	0.24	4
0.95	0.22	4
0.96	0.21	4
0.97	0.2	4
0.98	0.18	4
0.99	0.16	4
0.99	0.15	4
0.99	0.14	4
0	0	5
0	0	5
0	0	5
0	0	5
0	0	5
0	0	5
0	0	5
0	0	5
0.01	0	5
0.02	0	5
0.03	0	5
0.05	0	5
0.06	0	5
0.07	0	5
0.08	0	5
0.09	0	5
0.1	0	5
0.11	0	5
0.12	0	5
0.14	0	5
0.15	0	5
0.16	0	5
0.17	0	5
0.18	0	5
0.2	0	5
0.21	0	5
0.22	0	5
0.24	0	5
0.25	0	5
0.26	0	5
0.27	0	5
0.28	0	5
0.3	0	5
0.31	0	5
0.32	0	5
0.33	0	5
0.34	0	5
0.35	0	5
0.37	0	5
0.38	0	5
0.39	0	5
0.41	0	5
0.42	0	5
0.43	0	5
0.44	0	5
0.46	0	5
0.47	0	5
0.48	0	5
0.49	0	5
0.51	0	5
0.52	0	5
0.53	0	5
0.54	0	5
0.55	0	5
0.56	0	5
0.57	0	5
0.59	0	5
0.6	0	5
0.61	0	5
0.63	0	5
0.64	0	5
0.65	0	5
0.67	0	5
0.68	0	5
0.69	0	5
0.7	0	5
0.72	0	5
0.73	0	5
0.74	0	5
0.75	0	5
0.77	0	5
0.78	0	5
0.79	0	5
0.8	0	5
0.82	0	5
0.83	0	5
0.84	0	5
0.85	0	5
0.87	0	5
0.88	0	5
0.89	0	5
0.9	0	5
0.92	0	5
0.93	0	5
0.94	0	5
0.95	0	5
0.96	0	5
0.98	0	5
0.99	0	5
1	0	5
1.01	0	5
1.03	0	5
1.04	0	5
1.05	0	5
1.07	0	5
1.08	0	5
1.09	0	5
1.1	0	5
1.12	0	5
1.13	0	5
1.14	0	5
1.15	0	5
1.16	0	5
1.18	0	5
1.19	0	5
1.2	0	5
1.21	0	5
1.23	0	5
1.24	0	5
1.26	0	5
1.26	0	5
1.28	0	5
1.29	0	5
1.31	0	5
1.32	0	5
1.33	0	5
1.34	0	5
1.36	0	5
1.37	0	5
1.38	0	5
1.39	0	5
1.41	0	5
1.42	0	5
1.43	0	5
1.44	0	5
1.46	0	5
1.47	0	5
1.48	0	5
1.49	0	5
1.51	0	5
1.52	0	5
1.53	0	5
1.55	0	5
1.56	0	5
1.57	0	5
1.58	0	5
1.59	0	5
1.61	0	5
1.62	0	5
1.63	0	5
1.64	0	5
1.65	0	5
1.67	0	5
1.68	0	5
1.69	0	5
1.7	0	5
1.72	0	5
1.73	0	5
1.74	0	5
1.75	0.01	5
1.76	0.01	5
1.78	0.01	5
1.79	0.01	5
1.8	0.01	5
1.81	0.01	5
1.82	0.01	5
1.83	0.01	5
1.84	0.01	5
1.86	0.01	5
1.87	0.01	5
1.88	0.01	5
1.9	0.01	5
1.91	0.01	5
1.92	0.01	5
1.93	0.01	5
1.94	0.01	5
1.96	0.01	5
1.97	0.01	5
1.98	0.02	5
1.99	0.02	5
2	0.02	5
2.02	0.02	5
2.03	0.02	5
2.04	0.03	5
2.06	0.03	5
2.07	0.03	5
2.08	0.05	5
2.09	0.07	5
2.11	0.1	5
2.12	0.13	5
2.13	0.17	5
2.15	0.23	5
2.16	0.3	5
2.17	0.37	5
2.18	0.45	5
2.19	0.54	5
2.2	0.61	5
2.22	0.73	5
2.23	0.8	5
2.24	0.89	5
2.26	1.02	5
2.27	0.11	5
2.28	0.11	5
2.3	0.12	5
2.31	0.12	5
2.32	0.11	5
2.33	0.12	5
2.35	0.12	5
2.36	0.13	5
2.37	0.13	5
2.38	0.05	5
2.39	0.04	5
2.4	0.05	5
2.41	0.05	5
2.43	0.05	5
2.44	0.05	5
2.45	0.04	5
2.46	0.04	5
2.47	0.03	5
2.49	0.03	5
2.5	0.03	5
2.51	0.03	5
2.53	0.03	5
2.54	0.03	5
2.54	0.03	5
0	0	6
0	0.01	6
0.01	0.02	6
0.02	0.04	6
0.03	0.07	6
0.05	0.1	6
0.05	0.14	6
0.07	0.2	6
0.08	0.26	6
0.09	0.34	6
0.1	0.44	6
0.12	0.54	6
0.13	0.58	6
0.14	0.7	6
0.15	0.82	6
0.17	0.94	6
0.18	0.48	6
0.19	0.52	6
0.21	0.52	6
0.21	0.53	6
0.21	0.54	6
0.23	0.56	6
0.24	0.57	6
0.25	0.51	6
0.27	0.52	6
0.28	0.53	6
0.29	0.53	6
0.3	0.33	6
0.31	0.27	6
0.33	0.21	6
0.34	0.19	6
0.35	0.19	6
0.36	0.19	6
0.38	0.2	6
0.39	0.2	6
0.4	0.21	6
0.41	0.21	6
0.42	0.21	6
0.43	0.21	6
0.45	0.08	6
0.46	0.08	6
0.47	0.07	6
0.48	0.07	6
0.49	0.07	6
0.5	0.07	6
0.5	0.07	6
0	0	7
0	0	7
0	0	7
0	0	7
0	0	7
0	0.01	7
0.01	0.01	7
0.02	0.02	7
0.03	0.02	7
0.04	0.03	7
0.06	0.04	7
0.07	0.06	7
0.08	0.08	7
0.09	0.12	7
0.1	0.16	7
0.12	0.23	7
0.13	0.3	7
0.14	0.38	7
0.15	0.49	7
0.17	0.56	7
0.18	0.66	7
0.19	0.74	7
0.2	0.85	7
0.22	0.97	7
0.23	1.07	7
0.24	0.51	7
0.25	0.55	7
0.27	0.51	7
0.28	0.52	7
0.29	0.47	7
0.3	0.42	7
0.31	0.43	7
0.33	0.44	7
0.34	0.45	7
0.35	0.46	7
0.36	0.42	7
0.38	0.21	7
0.39	0.18	7
0.4	0.12	7
0.41	0.09	7
0.41	0.08	7
0.41	0.08	7
0	0	8
0	0	8
0	0	8
0	0	8
0	0	8
0	0	8
0	0	8
0	0	8
0	0	8
0	0	8
0	0	8
0	0	8
0	0	8
0	0	8
0	0	8
0.01	0	8
0.02	0	8
0.03	0	8
0.04	0.03	8
0.06	0.07	8
0.07	0.13	8
0.08	0.21	8
0.09	0.28	8
0.1	0.36	8
0.11	0.46	8
0.12	0.57	8
0.13	0.69	8
0.14	0.84	8
0.15	0.97	8
0.16	1.1	8
0.18	1.27	8
0.18	1.41	8
0.2	1.57	8
0.21	1.77	8
0.22	1.69	8
0.23	1.51	8
0.25	1.56	8
0.26	1.28	8
0.27	1.09	8
0.29	1.15	8
0.3	1.23	8
0.31	1.28	8
0.32	1.35	8
0.33	1.41	8
0.34	1.47	8
0.36	1.55	8
0.37	1.58	8
0.38	1.6	8
0.39	1.62	8
0.41	1.65	8
0.42	1.66	8
0.43	1.01	8
0.44	0.99	8
0.45	0.95	8
0.47	0.89	8
0.48	0.89	8
0.49	0.91	8
0.51	0.93	8
0.52	0.97	8
0.53	1	8
0.54	1.03	8
0.55	1.05	8
0.56	1.07	8
0.58	1.08	8
0.59	1.07	8
0.6	1.04	8
0.61	1.02	8
0.63	0.96	8
0.64	0.83	8
0.65	0.76	8
0.66	0.72	8
0.67	0.68	8
0.69	0.66	8
0.7	0.64	8
0.71	0.61	8
0.73	0.52	8
0.74	0.43	8
0.75	0.39	8
0.76	0.36	8
0.77	0.35	8
0.78	0.33	8
0.8	0.32	8
0.81	0.29	8
0.82	0.27	8
0.84	0.27	8
0.84	0.24	8
0.84	0.22	8
0.84	0.21	8
0.84	0.2	8
0.84	0.2	8
0	0	9
0	0	9
0	0	9
0	0	9
0	0	9
0.01	0	9
0.02	0	9
0.03	0	9
0.04	0	9
0.05	0	9
0.06	0	9
0.08	0	9
0.09	0	9
0.1	0	9
0.11	0	9
0.13	0	9
0.14	0	9
0.15	0	9
0.16	0	9
0.18	0	9
0.19	0	9
0.2	0	9
0.21	0	9
0.22	0	9
0.24	0	9
0.25	0	9
0.26	0	9
0.27	0	9
0.28	0	9
0.3	0	9
0.31	0	9
0.32	0	9
0.33	0	9
0.34	0	9
0.36	0	9
0.37	0	9
0.38	0	9
0.4	0	9
0.41	0	9
0.42	0	9
0.43	0	9
0.45	0	9
0.46	0	9
0.47	0	9
0.48	0	9
0.5	0	9
0.51	0	9
0.52	0	9
0.53	0	9
0.54	0	9
0.56	0	9
0.57	0	9
0.58	0	9
0.6	0	9
0.61	0	9
0.62	0	9
0.64	0	9
0.65	0	9
0.66	0	9
0.67	0	9
0.68	0	9
0.7	0	9
0.71	0	9
0.72	0	9
0.73	0	9
0.74	0	9
0.76	0	9
0.77	0	9
0.78	0	9
0.8	0	9
0.81	0	9
0.82	0	9
0.83	0	9
0.84	0	9
0.86	0	9
0.87	0	9
0.88	0	9
0.89	0	9
0.9	0	9
0.92	0	9
0.93	0.05	9
0.94	0.12	9
0.95	0.2	9
0.97	0.27	9
0.98	0.31	9
0.99	0.38	9
1.01	0.46	9
1.02	0.52	9
1.03	0.58	9
1.04	0.66	9
1.05	0.72	9
1.06	0.8	9
1.08	0.85	9
1.09	0.91	9
1.1	0.99	9
1.11	1.06	9
1.12	1.14	9
1.14	1.24	9
1.15	1.31	9
1.16	1.39	9
1.17	1.46	9
1.19	1.53	9
1.2	1.57	9
1.21	1.61	9
1.23	1.65	9
1.24	1.69	9
1.25	1.75	9
1.26	1.45	9
1.27	1.52	9
1.29	1.6	9
1.3	1.66	9
1.31	1.7	9
1.33	1.75	9
1.34	1.84	9
1.35	1.9	9
1.36	1.95	9
1.37	1.91	9
1.38	1.78	9
1.4	1.26	9
1.41	1.27	9
1.42	1.3	9
1.44	1.35	9
1.45	1.39	9
1.46	1.42	9
1.47	1.45	9
1.48	1.43	9
1.49	1.42	9
1.51	1.44	9
1.52	1.43	9
1.53	1.43	9
1.54	1.42	9
1.56	1.42	9
1.57	1.41	9
1.58	1.34	9
1.59	1.32	9
1.6	0.91	9
1.62	0.86	9
1.63	0.84	9
1.64	0.81	9
1.65	0.8	9
1.67	0.78	9
1.68	0.76	9
1.69	0.73	9
1.7	0.59	9
1.71	0.55	9
1.73	0.52	9
1.74	0.5	9
1.75	0.48	9
1.76	0.46	9
1.78	0.45	9
1.78	0.42	9
1.8	0.41	9
1.81	0.4	9
1.82	0.39	9
1.84	0.38	9
1.85	0.37	9
1.86	0.37	9
1.88	0.37	9
1.89	0.37	9
1.9	0.37	9
1.91	0.33	9
0	0	10
0	0	10
0	0	10
0	0	10
0	0	10
0.01	0	10
0.03	0	10
0.03	0	10
0.04	0	10
0.06	0	10
0.07	0	10
0.08	0	10
0.09	0	10
0.1	0	10
0.12	0	10
0.13	0	10
0.14	0	10
0.16	0	10
0.17	0	10
0.18	0	10
0.19	0	10
0.21	0	10
0.22	0	10
0.23	0	10
0.24	0	10
0.25	0	10
0.27	0	10
0.28	0	10
0.29	0	10
0.3	0	10
0.32	0	10
0.33	0	10
0.34	0	10
0.36	0	10
0.37	0	10
0.39	0	10
0.4	0	10
0.41	0	10
0.42	0	10
0.43	0	10
0.45	0	10
0.46	0	10
0.47	0	10
0.48	0	10
0.49	0	10
0.51	0	10
0.52	0	10
0.53	0	10
0.55	0	10
0.56	0	10
0.57	0	10
0.58	0	10
0.59	0	10
0.61	0	10
0.62	0	10
0.63	0	10
0.64	0	10
0.66	0	10
0.67	0	10
0.68	0	10
0.69	0	10
0.7	0	10
0.71	0	10
0.73	0	10
0.74	0	10
0.75	0	10
0.77	0	10
0.78	0	10
0.79	0	10
0.81	0	10
0.82	0	10
0.83	0	10
0.84	0	10
0.85	0	10
0.87	0	10
0.88	0	10
0.89	0	10
0.9	0	10
0.92	0	10
0.93	0	10
0.94	0	10
0.96	0	10
0.97	0	10
0.98	0	10
0.99	0	10
1.01	0	10
1.02	0	10
1.03	0	10
1.05	0	10
1.05	0	10
1.07	0	10
1.08	0	10
1.09	0	10
1.11	0	10
1.12	0	10
1.13	0	10
1.14	0	10
1.15	0	10
1.16	0	10
1.18	0	10
1.19	0	10
1.2	0	10
1.22	0	10
1.23	0.01	10
1.24	0.01	10
1.26	0.01	10
1.26	0.01	10
1.28	0.01	10
1.29	0.01	10
1.3	0.01	10
1.31	0.01	10
1.32	0.01	10
1.34	0.01	10
1.35	0.01	10
1.36	0.01	10
1.37	0.02	10
1.39	0.01	10
1.4	0.02	10
1.41	0.01	10
1.43	0.01	10
1.44	0.01	10
1.45	0.01	10
1.46	0.02	10
1.47	0.02	10
1.48	0.02	10
1.5	0.03	10
1.51	0.04	10
1.52	0.05	10
1.54	0.07	10
1.55	0.09	10
1.56	0.11	10
1.57	0.15	10
1.58	0.18	10
1.59	0.23	10
1.61	0.29	10
1.62	0.34	10
1.63	0.4	10
1.65	0.46	10
1.66	0.5	10
1.67	0.55	10
1.68	0.6	10
1.69	0.65	10
1.7	0.69	10
1.72	0.75	10
1.73	0.79	10
1.74	0.84	10
1.75	0.19	10
1.77	0.22	10
1.78	0.23	10
1.79	0.24	10
1.8	0.24	10
1.81	0.23	10
1.83	0.21	10
1.84	0.2	10
1.85	0.16	10
1.87	0.16	10
1.88	0.15	10
1.89	0.15	10
1.9	0.15	10
1.91	0.15	10
1.92	0.15	10
1.93	0.13	10
1.93	0.13	10
0	0	11
0	0	11
0	0	11
0	0	11
0	0	11
0	0	11
0	0	11
0	0	11
0	0	11
0	0	11
0	0	11
0.01	0	11
0.01	0	11
0.02	0	11
0.03	0	11
0.04	0	11
0.05	0	11
0.06	0	11
0.08	0	11
0.09	0	11
0.1	0	11
0.11	0	11
0.12	0	11
0.13	0	11
0.14	0	11
0.15	0	11
0.17	0	11
0.18	0.01	11
0.18	0.01	11
0.2	0.02	11
0.21	0.02	11
0.22	0.02	11
0.23	0.02	11
0.24	0.02	11
0.25	0.02	11
0.27	0.03	11
0.28	0.03	11
0.29	0.02	11
0.31	0.03	11
0.32	0.03	11
0.33	0.03	11
0.34	0.03	11
0.35	0.03	11
0.37	0.03	11
0.38	0.03	11
0.39	0.03	11
0.4	0.03	11
0.41	0.02	11
0.42	0.02	11
0.43	0.03	11
0.45	0.03	11
0.46	0.03	11
0.47	0.03	11
0.49	0.03	11
0.5	0.03	11
0.51	0.03	11
0.52	0.04	11
0.54	0.04	11
0.55	0.04	11
0.56	0.05	11
0.57	0.06	11
0.58	0.06	11
0.6	0.08	11
0.61	0.09	11
0.62	0.1	11
0.63	0.11	11
0.64	0.13	11
0.66	0.15	11
0.67	0.18	11
0.68	0.21	11
0.69	0.24	11
0.71	0.27	11
0.72	0.3	11
0.73	0.36	11
0.74	0.44	11
0.76	0.5	11
0.77	0.41	11
0.78	0.45	11
0.79	0.49	11
0.8	0.52	11
0.82	0.55	11
0.83	0.59	11
0.84	0.63	11
0.85	0.68	11
0.86	0.73	11
0.87	0.77	11
0.89	0.83	11
0.9	0.88	11
0.91	0.92	11
0.93	0.98	11
0.94	1.02	11
0.95	0.45	11
0.96	0.52	11
0.98	0.58	11
0.99	0.64	11
1	0.37	11
1.01	0.38	11
1.02	0.38	11
1.04	0.37	11
1.05	0.32	11
1.06	0.28	11
1.07	0.27	11
1.08	0.24	11
1.1	0.24	11
1.1	0.21	11
0	0	12
0	0	12
0	0	12
0	0	12
0	0	12
0	0	12
0	0	12
0	0	12
0	0	12
0.01	0.01	12
0.02	0.01	12
0.03	0.01	12
0.05	0.01	12
0.06	0.01	12
0.07	0.01	12
0.09	0.01	12
0.1	0.02	12
0.11	0.02	12
0.12	0.02	12
0.13	0.02	12
0.14	0.03	12
0.16	0.03	12
0.17	0.03	12
0.18	0.03	12
0.19	0.04	12
0.2	0.04	12
0.22	0.04	12
0.23	0.04	12
0.24	0.04	12
0.26	0.04	12
0.27	0.04	12
0.28	0.04	12
0.29	0.04	12
0.3	0.04	12
0.31	0.04	12
0.33	0.04	12
0.34	0.04	12
0.35	0.04	12
0.36	0.04	12
0.37	0.05	12
0.38	0.05	12
0.4	0.05	12
0.41	0.05	12
0.42	0.05	12
0.43	0.05	12
0.45	0.06	12
0.46	0.06	12
0.47	0.06	12
0.48	0.06	12
0.49	0.06	12
0.51	0.06	12
0.52	0.06	12
0.53	0.06	12
0.54	0.06	12
0.55	0.07	12
0.57	0.07	12
0.58	0.07	12
0.59	0.06	12
0.6	0.05	12
0.62	0.05	12
0.63	0.05	12
0.64	0.06	12
0.65	0.07	12
0.66	0.08	12
0.67	0.09	12
0.69	0.1	12
0.7	0.12	12
0.71	0.13	12
0.73	0.15	12
0.74	0.18	12
0.75	0.21	12
0.76	0.27	12
0.77	0.32	12
0.78	0.37	12
0.8	0.46	12
0.81	0.55	12
0.82	0.64	12
0.84	0.77	12
0.84	0.78	12
0.86	0.85	12
0.87	1.03	12
0.88	0.98	12
0.89	1.03	12
0.91	0.27	12
0.92	0.27	12
0.94	0.28	12
0.95	0.3	12
0.96	0.3	12
0.97	0.3	12
0.98	0.28	12
0.99	0.24	12
0.99	0.22	12
1	0.21	12
0	0	13
0	0	13
0	0	13
0	0	13
0	0	13
0.01	0	13
0.02	0	13
0.03	0	13
0.04	0	13
0.06	0	13
0.07	0	13
0.08	0	13
0.1	0	13
0.11	0	13
0.12	0	13
0.13	0	13
0.15	0	13
0.16	0	13
0.17	0	13
0.18	0	13
0.19	0	13
0.2	0	13
0.21	0	13
0.23	0	13
0.24	0	13
0.25	0	13
0.27	0	13
0.28	0	13
0.29	0	13
0.3	0	13
0.31	0	13
0.32	0	13
0.34	0	13
0.35	0	13
0.36	0	13
0.37	0	13
0.38	0	13
0.39	0	13
0.41	0	13
0.42	0	13
0.43	0	13
0.44	0	13
0.46	0	13
0.47	0	13
0.48	0	13
0.49	0	13
0.51	0	13
0.52	0	13
0.53	0	13
0.54	0	13
0.56	0.01	13
0.57	0.02	13
0.58	0.02	13
0.59	0.03	13
0.61	0.03	13
0.62	0.04	13
0.63	0.05	13
0.64	0.07	13
0.65	0.1	13
0.66	0.14	13
0.68	0.2	13
0.69	0.26	13
0.7	0.36	13
0.72	0.45	13
0.73	0.56	13
0.74	0.69	13
0.75	0.82	13
0.76	0.96	13
0.77	1.12	13
0.79	1.26	13
0.8	1.38	13
0.81	1.47	13
0.82	1.5	13
0.83	0.72	13
0.85	0.65	13
0.86	0.54	13
0.87	0.55	13
0.89	0.51	13
0.9	0.53	13
0.91	0.53	13
0.92	0.35	13
0.94	0.35	13
0.95	0.34	13
0.96	0.3	13
0.97	0.28	13
0.99	0.27	13
1	0.09	13
1	0.08	13
0	0	14
0	0	14
0	0	14
0	0	14
0	0	14
0	0.01	14
0	0.01	14
0	0.01	14
0	0.01	14
0	0.02	14
0	0.03	14
0.01	0.03	14
0.02	0.04	14
0.03	0.04	14
0.04	0.04	14
0.05	0.04	14
0.06	0.05	14
0.07	0.05	14
0.08	0.05	14
0.09	0.04	14
0.11	0.04	14
0.12	0.04	14
0.13	0.04	14
0.14	0.04	14
0.15	0.04	14
0.16	0.04	14
0.18	0.04	14
0.19	0.04	14
0.2	0.04	14
0.21	0.05	14
0.22	0.05	14
0.23	0.05	14
0.25	0.06	14
0.26	0.07	14
0.27	0.08	14
0.28	0.08	14
0.3	0.09	14
0.31	0.09	14
0.32	0.11	14
0.33	0.13	14
0.34	0.15	14
0.35	0.17	14
0.37	0.21	14
0.38	0.27	14
0.39	0.33	14
0.4	0.4	14
0.42	0.49	14
0.43	0.57	14
0.44	0.66	14
0.45	0.79	14
0.46	0.92	14
0.48	1.05	14
0.49	0.83	14
0.5	0.81	14
0.51	0.87	14
0.52	0.9	14
0.53	0.92	14
0.55	0.87	14
0.56	0.83	14
0.57	0.79	14
0.58	0.78	14
0.6	0.7	14
0.61	0.63	14
0.62	0.59	14
0.63	0.48	14
0.65	0.46	14
0.66	0.44	14
0.67	0.41	14
0.68	0.4	14
0.7	0.34	14
0.71	0.28	14
0.72	0.24	14
0.73	0.21	14
0.75	0.17	14
0.76	0.17	14
0.77	0.17	14
0.79	0.15	14
0.79	0.13	14
0.79	0.12	14
Species		Date	Trial #	Segement #	Individual #
P. americana		2013-01-31	1	T2	1
Puncture Testing Raw Data			2	T3	1
			4	A3	1
Disp (mm)	Force (N)	Trial #	5	A4	1
1	0	0	6	A5	1
1	0	0	7	A6	1
1	0	0
1	0	0
1	0	0
1	0	0
1	0	0
1	0.01	0
1	0.03	0
1	0.04	0
1	0.05	0
1	0.06	0
1	0.08	0
1	0.09	0
1	0.1	0
1	0.11	0
1	0.13	0
1	0.14	0
1	0.15	0
1	0.16	0
1	0.17	0
1	0.19	0
1	0.2	0
1	0.21	0
1	0.22	0
1	0.24	0
1	0.25	0
1	0.26	0
1	0.28	0
1	0.29	0
1	0.3	0
1	0.31	0
1	0.32	0
1	0.33	0
1	0.35	0
1	0.36	0
1	0.37	0
1	0.39	0
1	0.4	0
1	0.41	0
1	0.42	0
1	0.44	0
1	0.45	0
1	0.46	0
1	0.47	0
1	0.48	0
1	0.5	0
1	0.51	0
1	0.53	0
1	0.54	0
1	0.55	0
1	0.56	0
1	0.57	0
1	0.58	0
1	0.6	0
1	0.61	0
1	0.62	0
1	0.63	0
1	0.64	0
1	0.66	0
1	0.67	0
1	0.68	0
1	0.7	0
1	0.71	0
1	0.72	0
1	0.73	0
1	0.74	0
1	0.76	0
1	0.77	0
1	0.78	0
1	0.79	0.01
1	0.8	0.03
1	0.82	0.05
1	0.83	0.08
1	0.84	0.11
1	0.85	0.14
1	0.86	0.16
1	0.88	0.18
1	0.89	0.19
1	0.9	0.2
1	0.92	0.21
1	0.93	0.21
1	0.94	0.22
1	0.95	0.23
1	0.96	0.24
1	0.98	0.25
1	0.99	0.28
1	1	0.31
1	1.01	0.37
1	1.02	0.42
1	1.03	0.5
1	1.04	0.59
1	1.05	0.69
1	1.07	0.8
1	1.08	0.96
1	1.09	1.1
1	1.1	1.25
1	1.11	1.35
1	1.13	1.49
1	1.14	1.63
1	1.15	1.79
1	1.16	1.91
1	1.17	2.02
1	1.19	2.17
1	1.2	2.28
1	1.21	2.37
1	1.22	2.19
1	1.23	2.25
1	1.25	2.33
1	1.26	2.39
1	1.27	2.42
1	1.28	2.36
1	1.3	2.25
1	1.31	2.2
1	1.32	2.18
1	1.33	2.18
1	1.35	2.19
1	1.36	2.19
1	1.37	2.16
1	1.38	2.13
1	1.39	2.11
1	1.41	2.09
1	1.42	2.05
1	1.43	2
1	1.44	1.99
1	1.46	1.99
1	1.47	2
1	1.48	2.01
1	1.49	2
1	1.5	2.01
1	1.52	2.01
1	1.53	1.88
1	1.54	1.87
1	1.55	1.88
1	1.57	1.81
1	1.58	1.73
1	1.59	1.54
1	1.6	1.54
1	1.61	1.49
1	1.63	1.44
1	1.64	1.41
1	1.65	1.39
1	1.66	1.37
1	1.68	1.32
1	1.69	1.32
1	1.7	1.27
1	1.71	1.22
1	1.73	1.17
1	1.74	1.1
1	1.75	1
1	1.77	0.91
1	1.78	0.84
1	1.79	0.82
1	1.8	0.79
1	1.82	0.72
1	1.83	0.55
1	1.84	0.53
1	1.85	0.53
1	1.87	0.53
1	1.88	0.54
1	1.89	0.55
1	1.9	0.56
1	1.92	0.57
1	1.93	0.57
1	1.94	0.58
1	1.95	0.58
1	1.97	0.58
1	1.98	0.57
1	1.99	0.58
1	2	0.56
1	2.01	0.5
1	2.01	0.46
1	2.01	0.45
1	2.01	0.44
1	2.01	0.43
2	0	0
2	0	0
2	0	0
2	0	0
2	0	0
2	0	0
2	0.01	0
2	0.01	0
2	0.03	0
2	0.04	0
2	0.05	0
2	0.06	0
2	0.07	0
2	0.08	0
2	0.1	0
2	0.11	0
2	0.12	0
2	0.13	0
2	0.15	0
2	0.16	0
2	0.17	0
2	0.18	0
2	0.2	0
2	0.21	0
2	0.22	0
2	0.23	0
2	0.24	0
2	0.26	0
2	0.26	0
2	0.28	0
2	0.29	0
2	0.3	0
2	0.32	0
2	0.33	0
2	0.34	0
2	0.36	0
2	0.37	0
2	0.38	0
2	0.39	0
2	0.41	0
2	0.42	0
2	0.43	0
2	0.44	0
2	0.45	0
2	0.47	0
2	0.48	0
2	0.49	0
2	0.5	0
2	0.52	0
2	0.53	0
2	0.54	0
2	0.55	0
2	0.57	0
2	0.58	0
2	0.59	0
2	0.6	0
2	0.62	0
2	0.63	0
2	0.64	0
2	0.65	0
2	0.66	0
2	0.67	0
2	0.69	0
2	0.7	0
2	0.71	0
2	0.73	0
2	0.74	0
2	0.75	0
2	0.76	0
2	0.78	0
2	0.79	0
2	0.8	0
2	0.81	0
2	0.83	0
2	0.84	0.03
2	0.85	0.05
2	0.86	0.08
2	0.87	0.12
2	0.88	0.16
2	0.9	0.19
2	0.91	0.24
2	0.92	0.27
2	0.93	0.3
2	0.95	0.34
2	0.96	0.37
2	0.97	0.4
2	0.99	0.45
2	1	0.49
2	1.01	0.52
2	1.03	0.54
2	1.04	0.58
2	1.05	0.62
2	1.06	0.65
2	1.07	0.7
2	1.08	0.74
2	1.1	0.79
2	1.11	0.83
2	1.12	0.87
2	1.14	0.92
2	1.15	0.96
2	1.16	1
2	1.18	1.04
2	1.19	0.73
2	1.2	0.76
2	1.21	0.6
2	1.23	0.66
2	1.24	0.77
2	1.25	0.88
2	1.26	0.98
2	1.27	1.08
2	1.29	1.21
2	1.3	1.3
2	1.31	1.38
2	1.32	1.47
2	1.33	1.52
2	1.35	1.54
2	1.36	1.45
2	1.37	1.36
2	1.38	1.43
2	1.4	1.51
2	1.41	1.42
2	1.42	1.28
2	1.44	1.32
2	1.45	1.37
2	1.46	1.43
2	1.47	1.51
2	1.48	1.42
2	1.49	1.42
2	1.51	1.14
2	1.52	1.15
2	1.53	1.21
2	1.54	0.91
2	1.55	0.92
2	1.57	0.92
2	1.58	0.88
2	1.59	0.84
2	1.6	0.82
2	1.62	0.79
2	1.63	0.73
2	1.64	0.65
2	1.66	0.58
2	1.67	0.57
2	1.68	0.61
2	1.69	0.66
2	1.7	0.65
2	1.71	0.62
2	1.73	0.58
2	1.74	0.55
2	1.75	0.51
2	1.77	0.49
2	1.78	0.47
2	1.79	0.47
2	1.8	0.46
2	1.82	0.46
2	1.83	0.45
2	1.84	0.44
2	1.86	0.46
2	1.87	0.54
2	1.88	0.62
3	0	0
3	0	0
3	0	0
3	0	0
3	0	0
3	0	0
3	0	0
3	0.01	0
3	0.03	0
3	0.04	0
3	0.05	0
3	0.06	0
3	0.07	0
3	0.08	0
3	0.1	0
3	0.11	0
3	0.12	0
3	0.13	0
3	0.14	0
3	0.16	0
3	0.17	0
3	0.18	0
3	0.19	0
3	0.21	0
3	0.22	0
3	0.23	0
3	0.25	0
3	0.26	0
3	0.27	0
3	0.28	0
3	0.29	0
3	0.3	0
3	0.32	0
3	0.33	0
3	0.34	0
3	0.36	0
3	0.37	0
3	0.38	0
3	0.39	0
3	0.41	0
3	0.42	0
3	0.43	0
3	0.45	0
3	0.45	0
3	0.47	0
3	0.48	0
3	0.49	0
3	0.51	0
3	0.52	0
3	0.53	0
3	0.54	0.02
3	0.55	0.03
3	0.57	0.03
3	0.58	0.04
3	0.59	0.04
3	0.61	0.05
3	0.62	0.05
3	0.63	0.04
3	0.64	0.04
3	0.66	0.04
3	0.67	0.06
3	0.68	0.07
3	0.69	0.08
3	0.71	0.09
3	0.72	0.08
3	0.73	0.08
3	0.74	0.08
3	0.75	0.08
3	0.77	0.09
3	0.78	0.09
3	0.79	0.1
3	0.8	0.1
3	0.82	0.11
3	0.83	0.11
3	0.84	0.11
3	0.85	0.11
3	0.87	0.12
3	0.88	0.12
3	0.89	0.12
3	0.91	0.12
3	0.92	0.13
3	0.93	0.13
3	0.94	0.14
3	0.95	0.14
3	0.96	0.14
3	0.98	0.14
3	0.99	0.13
3	1	0.13
3	1.01	0.11
3	1.03	0.11
3	1.04	0.11
3	1.05	0.11
3	1.06	0.1
3	1.08	0.09
3	1.09	0.09
3	1.1	0.07
3	1.11	0.07
3	1.13	0.07
3	1.14	0.06
3	1.15	0.06
3	1.16	0.06
3	1.17	0.04
3	1.19	0.04
3	1.2	0.05
3	1.21	0.05
3	1.22	0.06
3	1.24	0.06
3	1.25	0.07
3	1.25	0.07
3	1.25	0.07
3	1.25	0.07
3	1.25	0.06
5	0	0
5	0	0
5	0	0
5	0	0
5	0	0
5	0	0
5	0.01	0
5	0.03	0
5	0.04	0
5	0.05	0
5	0.06	0
5	0.08	0
5	0.09	0
5	0.1	0.01
5	0.11	0.01
5	0.12	0.01
5	0.14	0.02
5	0.15	0.02
5	0.16	0.02
5	0.18	0.02
5	0.18	0.02
5	0.2	0.02
5	0.21	0.02
5	0.22	0.02
5	0.24	0.02
5	0.25	0.02
5	0.26	0.02
5	0.27	0.03
5	0.29	0.03
5	0.3	0.04
5	0.31	0.05
5	0.32	0.06
5	0.33	0.07
5	0.35	0.11
5	0.36	0.17
5	0.37	0.22
5	0.38	0.29
5	0.4	0.4
5	0.41	0.49
5	0.42	0.59
5	0.43	0.72
5	0.44	0.09
5	0.45	0.05
5	0.46	0.06
5	0.48	0.06
5	0.49	0.07
5	0.5	0.08
5	0.51	0.08
5	0.53	0.09
5	0.54	0.09
5	0.55	0.09
5	0.56	0.09
6	0	0
6	0	0
6	0	0
6	0	0
6	0	0
6	0	0
6	0	0
6	0	0
6	0	0
6	0.01	0
6	0.02	0
6	0.03	0
6	0.04	0
6	0.05	0
6	0.07	0
6	0.08	0
6	0.09	0
6	0.1	0
6	0.11	0
6	0.13	0
6	0.14	0
6	0.15	0
[truncated: 2,910 more rows]
